# Supplementary material
Source: MDPI journal article supplement (https://www.mdpi.com/2571-550X/2/1/13)
Supplement: s1 [file s1]

## Sheet: Cored Lakes
Supplemental Table 1: Carbon Content of Cored Lakes
FID	Permanent_ID	GNIS_Name	Area	Perimeter	Complexity	Elevation	Depth	Forest	Total C in Core	Total C since 11700 BP	Total C 11,700 to 2000 BP	Holocene C	Predicted C	Holocene C Rate
--	--	--	m2	m	--	m	m	%	g/cm2	g/cm2	g/cm2	g/cm2	g/cm2	g/m2/yr
3308	35210292	Bald Lake	22404.6	731.614	1.37855	3365.87	7	100	7.86	7.74	6.67	8.04526	8.56	6.87629
235	35189846	Dead Horse Lake	57754.8	1190.29	1.39691	3317.25	12.5	18.7	2.74	2.63	2.33	2.81*	--	--
2024	58224588	Elbow Lake	100101	2011.57	1.79318	3332.9	10.7	9.5	8.1	7.28	7.27	8.76897	7.23	7.49485
1818	35210286	Hessie Lake	53423.8	998.981	1.21898	3237.87	6.1	0	9.55	9.55	9.55	17.0*	--	--
4039	58225152	Hoover Lake	78126.7	1168.14	1.1787	3019.13	7.9	100	3.43	3.19	3.01	3.63062	4.4	3.10309
493	75276491	Island Lake	452768	4423	1.8539	3286.53	11.4	49.7	3.4	3.06	2.78	3.3532	3.06	2.86598
150	46852463	Kermsuh Lake	39084.7	1106.69	1.57882	3141.44	5.2	51.6	4.35	4.34	4.03	4.86093	6.47	4.15464
1780	58225000	Little Superior Lake	60107.2	1039.96	1.19635	3417.87	9.5	3.7	6.35	6.35	6.23	7.51454	6.19	6.42268
3324	35210536	Lower Red Castle Lake	176020	2456.72	1.65151	3280.77	9.1	100	2.53	2.42	2.42	4.51*	--	--
125	58225236	Marshall Lake	80319.1	1169.29	1.16364	3045.52	10.7	71.3	4.53	3.78	3.39	4.08897	5.82	3.49485
345	58224472	North Star Lake	57813.6	940.142	1.10277	3474.97	5.8	2.8	3.54	3.45	3.35	4.04072	3.84	3.45361
1663	46846117	Ostler Lake	52819.1	1047.51	1.2855	3214.2	5.2	0	4.47	4.46	4.07	4.90918	4.53	4.19588
100	58225742	Pyramid Lake	58800.6	995.926	1.15836	2960.38	10.7	49.3	5.46	5.44	5.2	6.27216	6.77	5.36082
536	58224678	Reader Lake	47557.8	1177.87	1.52333	3310.53	4	60.4	6.29	6.1	5.12	6.17567	5.01	5.27835
2433	46852531	Ryder Lake	85836.5	1504.42	1.44824	3238.63	17.4	73.5	10.35	9.74	9.01	10.8677	10.42	9.28866
4944	58225834	Spider Lake	81115.1	2413.56	2.39009	3316.67	12.8	100	9.14	9.14	8.09	9.75804	10.45	8.34021
331	58226550	Swasey Lake	146211	2073.17	1.52916	3267.57	9.5	54.8	4.06	3.79	3.79	4.57144	4.58	3.90722
5151	58224614	Taylor Lake	90064.1	1337.32	1.25681	3420.53	11	85.7	4.48	4.11	3.65	4.40258	6	3.76289
1896	58227602	Upper Lily Pad	39925.6	799.733	1.12883	3127.43	9.8	100	10.12	9.2	7.83	9.44443	7.35	8.07216
												*not used in regression

## Sheet: Lakes with Depths
Supplemental Table 2: Carbon Content of Lakes with Depths
FID	Permanent_ID	GNIS_Name	Cored?	Area	Perimeter	Complexity	Elevation	Depth	Predicted C	Holocene C Rate
--	--	--	--	m2	m	--	m	m	g/cm2	g/m2/yr
324	58225416	Five Point Lake		330587	2973.55	1.45861	3357.17	6.4	0.0852577	0.0728698
3168	58226008	Governor Dern Lake		130579	1584.16	1.23643	3043.53	3	0.285894	0.244354
4371	58224024	Kidney Lakes		87593	1317.11	1.25515	3310.63	1	0.487967	0.417066
201	46845963	Scow Lake		87572.5	1190.76	1.13488	3083.09	2	0.559745	0.478414
1529	82733727	Lost Lake		250773	2294.96	1.29254	3019.08	7	0.698302	0.596839
5796	58225194	Lake Atwood		831264	5206.64	1.61063	3363.83	12.2	0.927242	0.792515
3136	58226806	Mohawk Lake		192176	2008.28	1.29206	3168.23	7	1.52789	1.30589
487	58224168			72956.2	1182.53	1.23478	3303.33	2	1.5389	1.3153
2680	58223946	Rainbow Lake		140150	1583.78	1.19318	3394.23	6	1.56943	1.34139
5148	58226098	Rasmussen Lakes		66137.5	1069.72	1.17316	3193.57	2	1.59741	1.36531
1216	58225232	Cleveland Lake		88678.6	1497.26	1.41807	3238.53	2	1.59966	1.36723
3367	58226076	Farmers Lake		195607	2236.02	1.4259	3345.37	7	1.9501	1.66675
4563	40036145	Goose Lakes		85792.9	1414.7	1.36222	3126.46	3	2.06738	1.76699
3400	58225600	B-29 Lake		73750.5	1392.5	1.44617	3274.53	2	2.27057	1.94065
493	75276491	Island Lake	Yes	452768	4423	1.8539	3286.53	10	2.27683	1.94601
3976	22AA40D6	Wigwam Lake		62199.7	1057.56	1.19597	3238.53	3	2.44145	2.08671
1364	40036335	Ashley Twin Lakes		126246	2401.89	1.90656	3151.37	3	2.48915	2.12748
521	58226158			60616.8	1178.89	1.35046	3187.77	2	2.55152	2.18079
1272	58225878	Workman Lake		83460	1356.64	1.32444	3189.36	4	2.57626	2.20193
3164	58226952	Grandaddy Lake		680788	5999.57	2.05079	3141.03	12	2.60962	2.23045
4110	58224552	Shaler Lake		43412.4	815.426	1.10379	3328.44	2	2.61728	2.23699
4415	58224460	Brook Lake		53726.2	1062.27	1.29256	3334.93	2	2.7162	2.32153
5606	58224438	Rosalie Lake		40360.2	776.503	1.09012	3325.61	2	2.78466	2.38005
185	58226538	Powell Lake		100096	1558.97	1.38976	3043.53	5	2.80064	2.39371
1668	58225780	Daynes Lake		92647.3	1305.97	1.21011	3250.83	6	2.93071	2.50488
5837	58223930			60110.3	1007.46	1.15894	3421.03	4	2.95487	2.52553
1891	58224744			45347	923.898	1.22365	3477.06	2	2.98048	2.54742
1072	35210776	Smiths Fork Pass Lake		104528	1726.37	1.506	3400.87	5	3.05443	2.61062
2632	35180910	Marsh Lake		144473	2229.65	1.65444	2846.96	6	3.05779	2.61349
5085	75276737	GR-177		74809.1	1403.62	1.44737	3311.13	3.5	3.06855	2.6227
5063	58226232	Middle Chain Lake		56619.4	970.962	1.15087	3237.53	4	3.10793	2.65635
6060	58224902	Sharlee		37420.2	866.662	1.26359	3274.23	1	3.17725	2.71559
428	58224822			58816.6	930.665	1.08231	3363.76	5	3.25044	2.77816
4034	72140211	Picturesque/Scout Lake		73922.3	1211.93	1.25718	3168.18	5	3.26189	2.78794
1161	75276479	Beaver Lake		144577	1647.64	1.22214	3203.63	9	3.26545	2.79098
488	58224254	Dime/Dollar Lake		41932.8	897.07	1.23554	3264.33	2	3.27184	2.79645
5028	58225074			62101.6	1418.81	1.60576	3481.43	2	3.31468	2.83306
3423	58224070			55220.7	986.073	1.18349	3310.63	4	3.32145	2.83885
2447	58227376	Arta Lake		50588.2	1139.6	1.42901	3193.53	2	3.39033	2.89772
345	58224472	North Star Lake	Yes	57813.6	940.142	1.10277	3474.97	5	3.39491	2.90163
3536	58225576	Sand Lake		50922.8	1341.8	1.67702	3176.57	1	3.58598	3.06494
5588	58227018	Fern Lake		76650.9	1204.7	1.22724	3019.13	6	3.59087	3.06912
4349	58225616	Carrot Lake		130642	1586.97	1.23833	3298.53	9	3.6458	3.11607
744	58227964	Moon Lake		3.10523e+06	12998.2	2.08039	2465.32	22.25	3.66799	3.13504
4075	58225218	Packard Lake		37086.6	760.178	1.11331	3044.53	3	3.70986	3.17082
3078	58224388			215088	2267.67	1.37905	3055.68	11	3.72767	3.18604
929	58225584	Jean Lake		91416.6	1355.18	1.26413	3279.13	7	3.74304	3.19918
5430	82733875	Buckeye Lake		32833.9	751.453	1.16963	2951.58	2	3.77041	3.22257
47	82733809	Beth Lake		33117.2	676.856	1.049	2983.7	3	3.7753	3.22675
5769	75288985	Grass Lake		41661.9	1109.02	1.53241	3298.77	1	3.7762	3.22752
4179	35205128	Lyman Lake		149895	1932.11	1.40749	2839.62	9	3.83662	3.27916
3807	35180878	Bridger Lake		86143.9	1626.92	1.56337	2850.06	5	3.8398	3.28188
4146	58224040	Helen Lake		42859	824.469	1.12321	3329.87	4	3.85987	3.29903
1663	46846117	Ostler Lake	Yes	52819.1	1047.51	1.2855	3214.2	4	3.86084	3.29986
5804	58225422	Allen Lake		65257.4	1194.61	1.31892	3348.43	5	3.88357	3.31929
3987	82733567	Petit Lake		30836.6	803.772	1.29094	3119.6	1	3.88551	3.32095
4124	58226000	Allen Lake		56202	1014.57	1.20702	3167.45	5	3.92078	3.3511
2645	58225940			33674.6	809.738	1.24452	3371.93	2	3.99206	3.41202
3261	58226770			67057.6	1261.64	1.3741	3243.54	5	3.99712	3.41634
5744	35210380			29446.7	697.137	1.1458	3238.27	2	4.0108	3.42803
4436	58224452			39444.6	869.18	1.23431	3371.53	3	4.01711	3.43343
1851	58225898	East Timothy Lake		168649	1823.71	1.25248	3360.43	11	4.02116	3.43689
4103	58226188	Rainbow Lake		71079.9	1364.27	1.44323	3032.05	5	4.05291	3.46403
253	58226408	Picture Lake		78288.7	1716.26	1.72998	3272.44	4	4.07004	3.47866
4531	75294639	Potter Lake		79620.6	1566.57	1.56583	3089.27	5	4.0934	3.49863
2050	58225702	Saucer Lake		22988.6	599.966	1.11603	3201.97	1	4.09774	3.50234
4863	58226282	Squaw Lake		43979.8	1001.31	1.34664	3202.73	3	4.09903	3.50345
3324	35210536	Lower Red Castle Lake	Yes	176020	2456.72	1.65151	3280.77	9	4.10922	3.51216
1275	75294491	Daggett Lake		162556	2250.25	1.57411	3190.47	9	4.1253	3.5259
1818	35210286	Lake Hessie	Yes	53423.8	998.981	1.21898	3237.87	5	4.12692	3.52728
315	58224174			49067	1022.66	1.30209	3446.35	4	4.15317	3.54972
2587	58225974			54185.9	1025.27	1.24223	3299.57	5	4.17418	3.56768
35	82733979	Alexander Lake		96149.8	1250.7	1.13759	2848.3	9	4.19242	3.58327
4843	46867131	Norice Lake		29704.9	826.434	1.35239	3191.97	1	4.22756	3.6133
5411	82733679	Duck Lake		67699.6	1338.81	1.45122	2982.57	5	4.23187	3.61698
2486	58224508	Black Lake		48309.7	1021.12	1.31029	3178.47	4	4.23216	3.61723
1054	58225590	Gem Lake		48915	923.015	1.17705	3302.67	5	4.23279	3.61777
2676	58226332	Lower Chain Lake		243914	2592.13	1.48028	3226.43	12	4.23693	3.62131
3988	82733637	Crystal Lake		29143.7	722.627	1.19385	3057.76	2	4.24214	3.62576
335	58225132	Superior Lake		146022	2291.5	1.69129	3404.17	8	4.24921	3.6318
4231	58225854	Bluebell Lake		154857	1947.52	1.3958	3322.17	10	4.25349	3.63546
2481	58225572	Thompson Lake		87100.4	1274.17	1.21766	3259.95	8	4.27169	3.65102
5014	58225790	Lower Carroll Lake		27659.5	685.33	1.16221	3372.63	2	4.27531	3.65411
2669	58226078	Upper Chain Lake		198686	1842.77	1.16599	3239.73	13	4.28051	3.65855
5592	58224470	Margie Lake		33138.2	754.477	1.16893	3349.72	3	4.29769	3.67324
1126	58225318	Allred Lake		130589	1821.3	1.42146	3347.33	9	4.3152	3.6882
4791	58226544	Fish Hatchery Lake		122485	1692.73	1.36412	3117.52	9	4.31587	3.68878
331	58226550	Swasey Lake	Yes	146211	2073.17	1.52916	3267.57	9	4.31598	3.68887
3305	58224714			34929.4	717.683	1.08304	3493.17	4	4.32255	3.69449
435	58225002	Craig Lake		39697.4	833.391	1.17971	3308.23	4	4.33699	3.70683
4855	58224268	Continent Lake		81532	1353.3	1.33671	3441.35	7	4.37094	3.73584
4400	58223984	Samuels Lake		23343.9	579.132	1.06905	3347.93	2	4.40047	3.76108
5418	82733573	Long Lake		133494	2135.44	1.6484	3080.08	8	4.40498	3.76494
383	75294559	Henrys Fork Lake		69520.9	1278.55	1.36763	3298.87	6	4.42054	3.77824
2646	58224888	U-75		41745.5	801.177	1.10594	3578.66	5	4.42604	3.78294
1940	58223948	Davis Lakes		25344.5	641.886	1.13717	3358.97	2	4.44282	3.79729
6099	40037029	Paul Lake		44130.5	865.262	1.16168	3237.96	5	4.49066	3.83817
4366	75276707	Coffin Lake		105950	1487.45	1.28884	3309.73	9	4.49388	3.84093
6067	75273305	Summit		37039.7	1003.83	1.47107	3189.53	2	4.50466	3.85013
4420	58224898			54982.9	994.911	1.19668	3323.33	6	4.50661	3.8518
1133	58227298			27213.9	709.72	1.21339	3213.43	2	4.53478	3.87588
1103	120027883	Dollar Lake		37353.1	722.065	1.05371	3289.11	5	4.53898	3.87947
2763	58226532	Angel		46796	934.646	1.21857	3173.77	5	4.53907	3.87954
3205	58224244	Gladys Lake		32063.7	860.617	1.35554	3324.33	2	4.5591	3.89667
5059	58224876	Painter Lakes		53411.3	1092.16	1.33284	3365.86	5	4.56019	3.8976
4883	58225288	Lower Ottoson Lake		34586.9	940.13	1.42574	3378.77	2	4.56706	3.90347
161	58226516	Farney Lake		49472.3	1125.35	1.42697	3182.85	4	4.57109	3.90691
3548	75294767			23512	609.043	1.12024	3286.47	2	4.60463	3.93559
1905	58227584			41677.6	834.074	1.15229	3082.53	5	4.62999	3.95726
3301	58226004			52076.3	1211	1.49668	3300.57	4	4.6419	3.96744
4332	75294419	Gilbert Lake		62180.4	1180.76	1.3355	3325.66	6	4.65397	3.97775
5156	75273253	Fish Lake		153117	2960.39	2.13375	3258.53	7	4.6677	3.98948
1273	58225648	Teds Lake		55237.7	1043.47	1.25219	3152.07	6	4.7118	4.02718
3742	58228360	Heart Lake		61149.6	1186.28	1.353	2788.51	6	4.76926	4.07629
1780	58225000	Little Superior Lake	Yes	60107.2	1039.96	1.19635	3417.87	7	4.78593	4.09054
2715	58224494	Crescent Lake		121824	2338.55	1.88968	3302.4	7	4.79347	4.09698
2345	58226456	Broadhead Lake		36492.5	743.142	1.09718	3032	5	4.80762	4.10908
2521	58227434	Island Lake		268381	2309.94	1.25757	3125.82	15	4.82548	4.12434
3978	82733793			28977.3	645.725	1.06986	3093.46	4	4.84681	4.14257
4200	58227292	Atwine Lake		127697	1573.44	1.24184	3091.32	11	4.84877	4.14425
46	82733795	Haystack Lake		74559.1	1070.54	1.10576	3031.28	9	4.84941	4.14479
4865	58226028	X-97/Rock Creek 2		32614.5	660.018	1.03076	3220.27	5	4.85609	4.15051
1832	75289001	Castle Lake		42762.8	1138.12	1.55225	3465.17	3	4.87502	4.16669
2722	58224386	Fox Lake		356821	3645.89	1.72141	3287.23	14	4.89759	4.18597
3576	40035367	Deadman Lake		28535.9	720.374	1.20273	3347.57	3	4.90288	4.19049
3609	40035493			41374.7	876.508	1.21534	3290.96	5	4.91082	4.19728
42	72140321	Hidden Lake		27324.4	771.712	1.3167	3130.62	2	4.91795	4.20337
2161	40036063	Hopper Lakes		20883	638.513	1.24618	3203.74	1	4.93213	4.21549
3208	58224150	Lightning Lake		63894.9	1153.06	1.28655	3300.97	7	4.94714	4.22832
575	75294577	Lower Anson Lake		52188	1027.13	1.26808	3224.97	6	4.95031	4.23104
5767	75294637	Lake Blanchard		121817	1918.96	1.55067	3404.57	9	4.95384	4.23405
3507	58224910	Chepeta Lake		564410	4429.14	1.66276	3220.43	17	4.97422	4.25147
1004	58227368			23197.2	578.535	1.07132	3140.02	3	4.98943	4.26447
162	58226330	Lily Pad Lake		41365.3	999.75	1.38638	3134.24	4	4.99037	4.26528
2663	58226840	Albert		32783.3	966.323	1.50523	3301.63	2	4.9972	4.27111
2510	58227064	Mid Lake		19258.8	590.449	1.19999	3179.56	1	5.0021	4.2753
536	58224678	Reader Lake	Yes	47557.8	1177.87	1.52333	3310.53	4	5.01093	4.28285
4039	58225152	Hoover Lake	Yes	78126.7	1168.14	1.1787	3019.13	9	5.01281	4.28446
5031	75283695	GR-151		46044.2	1277.95	1.6797	3364.66	3	5.02633	4.29601
5139	58225276	Queant Lake		224111	2472.75	1.47318	3248.43	13	5.03714	4.30525
1723	58226594	Horseshoe Lake		86480.3	1893.93	1.81641	3269.74	6	5.11332	4.37036
3371	58225884	Center Timothy Lake		34769.4	754.525	1.14125	3360.53	5	5.14952	4.4013
3363	58225532	Milk Lake		62896.9	1328.91	1.49447	3350.77	6	5.163	4.41282
905	58224560	LeConte Lake		32621	703.839	1.09909	3330.04	5	5.1664	4.41572
1096	58226384	White Miller Lake		35316.1	776.231	1.16496	3250.53	5	5.20038	4.44477
1613	46846079	Hell Hole Lake		31364.5	855.369	1.3622	3153.31	3	5.21075	4.45364
399	58224918	Lake George Beard		32459.8	706.621	1.10617	3482.47	5	5.21298	4.45554
3179	58226448	Lost Lake		69788.2	1699.05	1.81394	3055.73	5	5.21766	4.45954
1005	58227534	Brown Duck Lake		128675	1528.2	1.20154	3106.32	12	5.22411	4.46505
5424	82733895	Spectacle Lake		49252.4	1143.95	1.45379	2973.7	5	5.23423	4.4737
2777	75273337			24679.6	733.935	1.31764	3213.33	2	5.23942	4.47814
3170	58225796	Pinto Lake		184762	2604.85	1.70916	3055.73	11	5.24203	4.48037
5581	58224904	Evermann Lake		32563.4	1014.21	1.58516	3208.14	2	5.26884	4.50329
1360	40035831	Hopper Lakes		22251.7	739.56	1.3983	3143.6	1	5.29174	4.52286
5146	58226740	Upper Rock Lake		139106	2138.56	1.61717	3230.07	10	5.30168	4.53135
1045	58225392			22166.8	658.162	1.24678	3379.57	2	5.30708	4.53597
1803	58224578	Tungsten Lake		52597.6	1407.88	1.73137	3460.01	4	5.31638	4.54392
5432	82733747	Tail Lake		37317.2	951.502	1.38919	3047.48	4	5.32194	4.54867
2311	82733685			27704.9	677.099	1.14731	3031.91	4	5.32567	4.55185
2466	58224676	Uintah Lake		42588.2	1114.18	1.52272	3336.13	4	5.35376	4.57587
38	82733777	Shadow Lake		41131.4	851.17	1.18369	3068.41	6	5.36044	4.58157
1469	72130431	South Erickson Lake		36579.8	939.061	1.38478	3081.43	4	5.36886	4.58877
889	58226150	Pine Island Lake		332838	4217.02	2.06156	3141.03	13	5.42943	4.64053
4357	58225964	Fourth Chain Lake		57549.2	898.529	1.05638	3310.43	9	5.43703	4.64703
4042	58224336	Bonnie Lake		17514.9	516.744	1.10123	3084.64	2	5.4416	4.65094
113	58224662	Moosehorn Lake		29061.8	827.207	1.36855	3168.49	3	5.47147	4.67647
4426	58225680			41479.9	992.003	1.37373	3238.57	5	5.49634	4.69773
1219	58225734	Point Lake		63480.3	1440.13	1.61209	3262.07	6	5.50113	4.70182
5490	58225436	Joan Lake		62384.1	1417.48	1.60062	3069.7	6	5.52097	4.71878
5720	58225170	Doll Lake		176262	1864.08	1.25225	3461.77	14	5.55935	4.75158
3251	58226980			24489.4	617.229	1.11241	3230.76	4	5.56141	4.75335
5464	82733689	Lilly Lake		23606	591.935	1.0866	3022.98	4	5.56249	4.75427
6168	40037203	Chimney Rock Lake		26928.9	615.406	1.05769	3211.56	5	5.57944	4.76875
5304	40035391	Hacking Lake		33888.2	802.155	1.22897	3240.06	5	5.58842	4.77642
1003	58227652	Big Dog Lake		24298.1	617.854	1.11791	3078.72	4	5.60981	4.79471
4657	72130409	North Erickson Lake		31913.4	845.293	1.33453	3056.95	4	5.61614	4.80012
2505	58224924	Anderson Lake		24812.3	633.716	1.13467	3228.65	4	5.61646	4.80039
4109	58224718	Jordan Lake		92463.1	1604.94	1.48862	3238.63	9	5.61731	4.80112
4882	58225866	Cleveland Lake		26821.6	873.856	1.50489	3408	2	5.6231	4.80606
3230	46867129	Allsop Lake		51483.6	1037.5	1.28962	3225.75	7	5.63334	4.81482
4730	46858647	Teal Lake		25107.2	644.59	1.14734	3131.01	4	5.63337	4.81485
3272	58224762	Lambert Lake		31230.7	740.76	1.18221	3347.84	5	5.65561	4.83385
3140	58225910	Margo Lake		61847.5	1021.57	1.15854	3177.63	9	5.6592	4.83692
5437	82733469	Clyde Lake		55766.2	1291.07	1.54196	3177.58	6	5.69042	4.86361
4527	40035847	Red Belly Lake		23155.3	749.067	1.38836	3214.86	2	5.69185	4.86483
2024	58224588	Elbow Lake	Yes	100101	2011.57	1.79318	3332.9	8	5.71205	4.88209
150	46852463	Kermsuh Lake	Yes	39084.7	1106.69	1.57882	3141.44	4	5.79718	4.95485
5147	58226910	Middle Rock Lake		27960.5	846.543	1.42785	3225.77	3	5.79765	4.95525
2108	40036329	Twin Lakes		50862.9	1058.53	1.32377	3140.96	7	5.79785	4.95543
5131	75276755	Round Lake		94931.5	1223.56	1.12003	3239.33	12	5.83388	4.98622
5676	58226900	Stewart Lake		34080.6	677.988	1.0358	3211.24	7	5.86036	5.00886
3172	58224782	Morat Lakes		19618.8	572.747	1.15328	3278.62	3	5.86993	5.01703
3229	58224184	Boot Lake		28203.1	689.753	1.15838	3385.5	5	5.87553	5.02182
3040	72140299	Bench Lake		23920.8	719.674	1.31237	3132.78	3	5.87656	5.0227
827	72140303	Pass Lake		27941.7	967.208	1.63193	3073.68	2	5.88786	5.03236
4860	58226320	Shamrock Lake		62808.3	972.99	1.09498	3160.95	10	5.89672	5.03993
1343	75294493			19414.3	642.071	1.29966	2828.08	2	5.92249	5.06195
1479	72130197	Olsen Lake		21472.4	578.037	1.11256	3118.71	4	5.97278	5.10494
125	58225236	Marshall Lake	Yes	80319.1	1169.29	1.16364	3045.52	11	5.9821	5.1129
3424	58224220	Bowden Lake		20015.3	535.226	1.067	3260.53	4	5.98974	5.11944
5134	58225864			25047.8	873.857	1.55727	3237.97	2	6.00258	5.13041
2636	75276959	Alligator Lake		66425.7	1336.56	1.46261	3059.72	8	6.00607	5.1334
140	58224650	Scudder Lake		16193.2	473.446	1.04933	3067.65	3	6.01182	5.13831
911	58226886	Lodgepole Lake		77499.7	1425.61	1.44431	3096.13	9	6.02241	5.14736
620	40035463	Blue Lake		24189.8	596.834	1.08229	3433.07	5	6.02591	5.15035
4899	58227050	Clement Lake		291417	3273.18	1.71009	3185.03	15	6.05715	5.17705
1690	58226118	Sea Lion Lake		37644	1259.64	1.83108	3167.05	3	6.07355	5.19107
2605	58224752			23830.3	596.837	1.09043	3435.77	5	6.10898	5.22135
2638	58225716	West Timothy Lake		150055	1738.98	1.26613	3384.63	14	6.11555	5.22697
2385	58225106	Shepard Lake		55953.3	893.994	1.06593	3044.65	10	6.12748	5.23717
5112	75276733	Bennion Lake		28973.3	842.918	1.39667	3339.33	4	6.13853	5.2466
224	46867093	Lake Lorena		46774.2	1159.4	1.51195	3227.13	6	6.14449	5.2517
2641	58224642			28253	732.174	1.22854	3469.26	5	6.15483	5.26054
1132	58227094			31924	948.434	1.49712	3286.43	4	6.17199	5.2752
93	72132837	Cuberant Lake		78303.2	1670.13	1.68332	3177.58	8	6.17302	5.27609
347	35210552			31675.1	840.288	1.33161	3315.67	5	6.18794	5.28884
5468	72155379	Fish Lake		202579	3138.4	1.96661	3114.74	12	6.19311	5.29326
4000	58227402	Iron Mine Lake		29152.9	681.819	1.12625	2923.47	6	6.19479	5.2947
5795	58225430	Roberts Lake		91433.5	1263.72	1.1787	3519.03	12	6.19852	5.29788
5042	58227448	Crow Lake		73798.3	1570.92	1.63094	3140.43	8	6.20498	5.3034
4716	82733519	Clegg Lake		18513.4	513.901	1.06523	3194.48	4	6.22539	5.32085
2801	58225434	Dollar Lake		30115.8	800.116	1.30036	3201.57	5	6.2306	5.3253
2031	58224530	Papoose Lake		56166.8	1459.03	1.73633	3250.43	6	6.24316	5.33603
2386	58224488	Blythe Lake		24139.8	700.382	1.27138	3021.57	4	6.25339	5.34478
2506	58224794	Phinney Lake		62876.5	1178.2	1.32521	3240.15	9	6.25873	5.34934
1234	75273293	Burnt Fork Lake		37307.9	727.95	1.06294	3238.53	8	6.26202	5.35215
4779	58225150	Wyman Lake		26259.9	688.507	1.19831	3048.23	5	6.26269	5.35272
3627	40036519			31695.5	762.292	1.20762	3299.56	6	6.27148	5.36024
938	58225676	Dale Lake		57249.8	1196.94	1.41089	3263.04	8	6.29607	5.38126
1968	58225976	Meadow Lake		14152.4	486.441	1.15325	3275.93	2	6.33108	5.41118
1484	72130187	Adax Lake		15668.4	488.511	1.1007	2961.87	3	6.34628	5.42417
4140	58224844	Brinkley Lake		24716.8	653.983	1.17322	3193.26	5	6.34936	5.4268
220	46867143	Priord Lake		43172.7	1103.8	1.49828	3312.08	6	6.35079	5.42803
3997	72140167	Meadow Lake		120204	1416.74	1.15249	2994.68	14	6.35295	5.42987
2340	46878227	Beaver Lake		55487	928.867	1.11216	2873.48	10	6.35926	5.43527
5655	58226126	Three Lakes		27164.8	820.666	1.40434	3299.24	4	6.36638	5.44135
4309	75294287	Sawmill Lake		27851.1	671.111	1.13418	3251.27	6	6.37147	5.4457
863	58226636	Sonny Lake		20601	598.896	1.17683	3191.35	4	6.37424	5.44807
984	58227318	Tworoose Lake		87259.7	1401.38	1.338	3140.93	11	6.39952	5.46967
5770	75294291	Bear Lake		68396.1	1061.37	1.14461	3283.57	11	6.4042	5.47368
5061	58227314	Bollie Lake		34471.4	973.383	1.47864	3250.23	5	6.43099	5.49657
445	58223940	Wilderness Lake/U-37		18851.5	550.958	1.13176	3413.48	4	6.46229	5.52333
3514	58226522	Cliff Lake		246339	2339.56	1.32946	3155.76	17	6.48046	5.53886
568	58225036	Pearl Lake		31288.6	882.704	1.40744	3262.57	5	6.49458	5.55092
5290	72130439	West Shingle Creek Lake		21866	658.801	1.25654	3031.61	4	6.50555	5.5603
4792	58224610	Blue Lake		70656.3	1128.24	1.19711	3336.13	11	6.51985	5.57252
4996	58226268			40276.9	1186.26	1.66709	3298.37	5	6.52587	5.57766
2997	82733717	Marjorie Lake		28186.7	788.463	1.32454	3045.42	5	6.52666	5.57834
3377	58225718	East Carroll Lake		33933	870.289	1.33248	3420.33	6	6.53499	5.58546
3364	35181086	Sargent Lake		32529.1	745.983	1.16654	2953.66	7	6.58173	5.62541
3475	58226194	Cirque Lake		22805.9	793.198	1.48138	3248.37	3	6.61247	5.65168
5848	75280409	Hidden Lake		22433.1	629.652	1.18567	3096.47	5	6.70336	5.72936
378	58226104			49500.2	985.137	1.24882	3329.77	9	6.71836	5.74219
2416	58224972	Wilder Lake		17276.6	525.73	1.12808	3017.88	4	6.71909	5.74281
4408	58223996	Divide Lake		76691.7	1155.49	1.17679	3420.63	12	6.73988	5.76058
66	82733565	Star Lake		75209	1269.79	1.30589	3044.58	11	6.7461	5.7659
773	82733833	Blue Lake		34627.2	740.387	1.12217	3045.89	8	6.75761	5.77574
972	58224538	Ledge Lake		18134.3	564.919	1.18316	3313.46	4	6.79864	5.81081
3227	58225752	Young Lake		22373.4	575.72	1.08556	3142.13	6	6.84334	5.84901
1585	58224190	Bud Lake		15601.1	484.262	1.09348	3117.9	4	6.88683	5.88618
3984	82733719	Washington Lake		391877	2736.34	1.23283	3043.48	21	6.90069	5.89803
2640	58225624	Upper Carroll Lake		116179	1362.2	1.12716	3396.53	15	6.9107	5.90658
4435	58227008	Lower Rock Lake		77621.6	1218.54	1.23355	3214.07	12	6.93042	5.92343
4082	58226790	Betsy Lake		132769	2007.77	1.55408	3153.23	13	6.93158	5.92443
1990	58225698			26967.4	815.057	1.39983	3323.83	5	6.9326	5.9253
100	58225742	Pyramid Lake	Yes	58800.6	995.926	1.15836	2960.38	11	6.93425	5.92671
991	58227000	Twin Lakes		21515	635.662	1.22226	3230.78	5	6.98111	5.96676
4858	58227708	Audry Lake		36875	844.939	1.24099	3056.32	8	7.04868	6.02451
4747	46858687	Ruth Lake		38718.4	801.213	1.14841	3155.03	9	7.07973	6.05106
2468	46846095	Salamander Lake		14601.5	468.187	1.09277	3056.78	4	7.09052	6.06027
4550	40036305	Fish Lake		67803	1082.91	1.17294	3275.26	12	7.10884	6.07593
1720	58225230	Upper Ottoson Lake		46363.9	991.118	1.2982	3388.95	9	7.11069	6.07751
4864	58225962	Rock Lakes		24259.9	668.369	1.21026	3222.05	6	7.11723	6.0831
5171	75273245	Lost Lake		13198.7	529.009	1.29869	3144.28	2	7.12435	6.08919
1340	75284153			35900.5	934.76	1.39142	2973.36	7	7.12759	6.09195
4161	58227120	Rudolph Lake		98416.7	1322.57	1.18903	3192.82	14	7.12885	6.09303
1846	58225986			26449.9	663.396	1.15045	3356.87	7	7.16072	6.12028
5237	40035519	Moap Lake		14064.7	578.475	1.37571	3276.86	2	7.20492	6.15805
2558	35209558			30827.8	711.867	1.1435	3402.75	8	7.21189	6.16401
2550	58227330	Aspen Lake		30984.5	719.123	1.15223	3128.32	8	7.23289	6.18196
1835	58225996			32542.3	760.803	1.18948	3344.07	8	7.23377	6.18271
5036	58223974	Milk Lake		55619.5	994.996	1.18991	3426.46	11	7.23818	6.18648
5214	40035485			42929.7	1173.79	1.59779	3300.95	7	7.23893	6.18712
320	58226548			36681.4	779.269	1.14755	3347.17	9	7.24494	6.19226
2327	82733459	John Lake		11782.3	425.54	1.10569	3203.31	3	7.2586	6.20393
5580	58225412	Carolyn Lake		20190.9	626.416	1.24335	3197.54	5	7.26241	6.20719
3570	58227530	Dead Lake		37551.9	1277.93	1.85995	3067.96	5	7.27498	6.21794
898	58226688	Shadow Lake		30658.4	806.202	1.2986	3033.57	7	7.28627	6.22758
3996	72140279	Ibantik Lake		36180.4	777.468	1.1528	3080.88	9	7.31001	6.24787
5603	58225508	Dean Lake		94424.1	1470.7	1.34987	3281.33	13	7.31379	6.25111
2326	82733831	Trident Lake		11543.1	473.555	1.24313	2970.91	2	7.33125	6.26603
822	72140181	Kamas Lake		69443.4	1041.48	1.11466	3203.74	13	7.34628	6.27887
909	58227322	Survey Lake		17608.5	613.695	1.30436	3263.34	4	7.36298	6.29314
3073	72140125	Cutthroat Lake		11789.4	435.341	1.13082	3171.38	3	7.36561	6.29539
2065	75294539	Weyman Lakes		32979.3	797.218	1.23812	3163.97	8	7.38628	6.31306
4798	58226420	Palisade Lake		98889.5	1403.82	1.25906	3092.33	14	7.39109	6.31717
781	82733495	Watson Lake		17195.3	679.641	1.46178	3179.71	3	7.4301	6.35051
1581	58225100	Maba Lake		17347.9	486.748	1.04229	3021.4	6	7.44106	6.35988
5255	40036391			27221.6	1294.05	2.21209	3138.93	2	7.4429	6.36146
1558	58225456	Echo Lake		75803.7	1187.72	1.21668	2970.38	13	7.49674	6.40747
2032	58224730	Moccasin Lake		48207.3	1280.76	1.6452	3238.43	8	7.57736	6.47637
5439	82733465	North Twin Lake		22445.8	600.825	1.13107	3179.64	7	7.59119	6.4882
5428	82733791	Azure Lake		24421.7	663.246	1.197	3095.36	7	7.6021	6.49752
950	46845981	Baker Lake		10726.7	460.849	1.25497	3179.91	2	7.60632	6.50113
4182	58227586	Little Dog Lake		16376.6	534.374	1.17772	3116.72	5	7.65379	6.5417
4656	82733733	Little Elk Lake		40353.4	945.844	1.32797	2986.87	9	7.65423	6.54208
1505	82733471	South Twin Lake		8430.8	354.071	1.08759	3174.86	2	7.66524	6.55148
1294	75294595			38930.1	1026.11	1.46676	3286.47	8	7.68895	6.57175
3434	58226498	Lily Lake		16118.2	530.92	1.17945	3101.83	5	7.71059	6.59025
760	82733789	Hidden Lake		34513.6	907.408	1.37757	2971.37	8	7.76122	6.63352
5626	58224056	Reconnaissance Lake		32710.1	767.444	1.19678	3401.85	9	7.80636	6.6721
5563	58227176	Heart Lake		19300.9	594.907	1.20772	3204.1	6	7.82141	6.68497
1572	58224862	Fehr Lake		21706.3	549.265	1.05147	3131.44	8	7.90137	6.75331
3259	58227104			30310.6	1143.06	1.85174	3201.42	5	7.92279	6.77162
3535	58225956	Wooley Lakes		65522.8	1102.01	1.21422	3236.66	13	7.94224	6.78824
2377	46878309	Bourbon Lake		7834.36	345.933	1.10229	2995.48	2	7.95952	6.80301
5467	72155365	Sand Lake		75905.6	1308.86	1.33987	3092.26	13	7.95975	6.80321
4745	46858685	Hayden Lake		14449.8	698.525	1.63892	3180.14	2	7.96859	6.81076
3954	35180584	Grahams Reservoir		26071.3	688.942	1.2034	2809.37	8	7.98271	6.82283
5397	72130573	Hourglass Lake		27983.9	941.587	1.5875	3012.87	6	7.98546	6.82518
1896	58227602	Upper Lily Pad	Yes	39925.6	799.733	1.12883	3127.43	11	8.0185	6.85342
5106	72156629	Castle Lake		25955.2	618.651	1.08303	3009.73	9	8.04517	6.87621
128	58224138	Butterfly Lake		18772.9	763.31	1.57124	3152.88	4	8.06469	6.8929
5300	75284075	Tepee Lakes		24265.9	578.945	1.04821	2875.11	9	8.09708	6.92058
4345	58227168			41283.8	1204.87	1.67247	3262.33	8	8.14133	6.9584
436	58224036	Verlie Lake		40608.6	1054.15	1.47537	3325.93	9	8.14445	6.96106
5785	58226834	Grayling Lake		35048.9	795.355	1.19821	3042.43	10	8.1554	6.97043
4353	58225924	Oke Doke Lake		49530.9	940.928	1.19241	3445.53	12	8.16951	6.98248
1515	82733671	Trial Lake		262318	2250.8	1.23945	2994.68	21	8.18057	6.99194
602	75294793	Lamb Lakes		24600.2	671.826	1.20808	3164.57	8	8.18296	6.99398
3033	72140315	Lovenia Lake		9046.13	380.723	1.12898	3146.08	3	8.18511	6.99582
3224	58224278	Doug Lake		9199.63	435.743	1.28131	3373.77	2	8.18666	6.99714
3314	58227246	Toquer Lake		34390	800.054	1.21678	3192.97	10	8.28918	7.08477
4944	58225834	Spider Lake	Yes	81115.1	2413.56	2.39009	3316.67	9	8.31996	7.11108
377	35180994	China Lake		109600	1916.74	1.63292	2869.26	14	8.32933	7.11909
1482	120030840	Ramona Lake		18640.3	642.369	1.32698	3155.8	6	8.38637	7.16784
4683	72140325	Peter Lake		9756.37	386.728	1.10425	3189.31	4	8.40074	7.18012
5634	58226936	Horseshoe Lake		12576.3	521.112	1.31057	3081.54	4	8.43737	7.21143
5651	35219196	Bobs Lake		24496.5	630.518	1.1362	3394.48	9	8.458	7.22906
4670	82733543	Island Lake		89825.4	1995.31	1.87767	3092.27	12	8.50945	7.27303
3235	58227262	Cabin Lake		15300.8	590.817	1.34711	3190.63	5	8.51702	7.2795
118	46858657	Jewel Lake		9639.94	393.579	1.13058	3144.2	4	8.55239	7.30973
3308	35210292	Bald Lake	Yes	22404.6	731.614	1.37855	3365.87	7	8.55544	7.31234
2467	46846113	Toomset Lake		7544.58	335.258	1.0886	3143.65	3	8.57571	7.32967
1700	35219280	Lake Ejod		10638.4	443.256	1.21206	3328.1	4	8.58163	7.33473
214	46882443	Amethyst Lake		170621	2120.25	1.4477	3278.36	18	8.59949	7.34999
4833	58227258	Docs Lake		70134.7	1215.72	1.29471	3014.53	14	8.59969	7.35016
4560	40036819			22112.9	917.362	1.73991	3229.65	5	8.6061	7.35564
1694	58224240	Bench Lake		7349.73	331.684	1.09118	3340.26	3	8.66891	7.40932
918	58224884	Hyatt Lake		10716.7	517.788	1.41068	3281.33	3	8.73479	7.46563
4955	58226482	Swasey Lakes		26909.7	748.319	1.28659	3296.57	9	8.76667	7.49288
2335	58228260	Blue Lake		17232.6	716.436	1.53925	2603.93	5	8.79149	7.51409
5151	58224614	Taylor Lake	Yes	90064.1	1337.32	1.25681	3420.53	16	8.79245	7.51491
4744	72140175	Lofty Lake		12079.6	426.113	1.09347	3299.33	6	8.80394	7.52473
4445	58227294	Larvae Lake		21826.3	594.873	1.13564	3055.07	9	8.81617	7.53519
2374	46878339	Whiskey Island Lake		19861.3	760.618	1.5222	3154.69	6	8.85301	7.56667
4693	120030835	James Lake		5189.42	264.394	1.03514	3204.25	2	8.94175	7.64252
6065	75273279	Jessen Lake		97227.7	1343.07	1.21482	3169.23	17	8.94778	7.64767
782	82733541	Petit Lake		5321.72	306.26	1.18406	3142.95	1	8.9552	7.65402
4367	75276617	Dine Lake		9035.68	355.525	1.05487	3191.66	5	8.97782	7.67335
792	82733705	Lost Lake Number Two/Teapot		53073.2	955.617	1.16991	3025.18	14	8.97946	7.67475
235	35189846	Dead Horse Lake	Yes	57754.8	1190.29	1.39691	3317.25	13	9.01539	7.70546
5531	46852495	McPheters Lake		111064	2253.72	1.90731	3311.73	14	9.04029	7.72675
3508	75273229	Hidden Lake (Sheep Creek)		17621.8	549.835	1.16819	3128.53	8	9.06253	7.74575
962	58224366	Jill Lake		16870.4	527.168	1.14471	3192.55	8	9.10027	7.77801
6059	58225938	Hidden Lake		53111.2	981.55	1.20123	3152.87	14	9.1052	7.78222
4859	58226924	Diamond Lake		52155.3	966.556	1.19367	3116.65	14	9.13136	7.80458
2994	72130321	Jerry Lake		11644.3	505.94	1.32236	3120.06	5	9.28029	7.93187
77	72140359	Reids Lake		7247.74	421.059	1.39492	3130.82	2	9.34317	7.98561
576	75294521	Weyman Lakes/Candy		21352.7	657.12	1.26831	3138.07	9	9.41992	8.05122
3118	58227492	Hades Lake		19962.3	553.725	1.10534	3046.73	10	9.52306	8.13937
2792	58226574	Watkins Lake		63155.2	1861.45	2.08907	3157.86	11	9.56772	8.17754
4255	35210732	East Red Castle Lake		82934.5	1145.74	1.12209	3412.47	18	9.61883	8.22122
3122	58226658	Marsell Lake		61727.5	1170.53	1.32877	3192.53	15	9.68334	8.27636
625	40035433	Lake Wilde		10981.4	579.7	1.5602	3420.23	4	9.70558	8.29537
1158	58227832	Heller Lake		32945.3	913.335	1.41919	2911.06	11	9.72769	8.31426
5669	35205164	Little Lyman Lake		26003.9	992.637	1.73612	2829.52	8	9.76619	8.34717
5413	82733695	Pot Reservoir		16536.8	531.131	1.16489	3033.54	9	9.80631	8.38146
3753	72130263	Anchor Lake		58811.8	1138.29	1.32382	3164.87	15	9.81642	8.39011
4707	72140367	Notch Lake		78488.3	1275.43	1.284	3142.35	17	9.88489	8.44862
5452	82733481	Hope Lake		5843.61	372.184	1.37317	3152.08	2	9.93974	8.4955
197	58225918	Bedground Lake		8955.35	434.795	1.29584	3202.89	5	10.0024	8.54903
1215	58225468			32267.3	676.809	1.06266	3409.41	14	10.0682	8.60526
4267	72137319	Lower Yellow Pine Lake		3755.04	232.215	1.06879	2935.48	2	10.1073	8.63875
1085	75288927	Cliff Lake		133552	1548.93	1.1954	3489.57	21	10.1141	8.64452
5695	72137315	Upper Yellow Pine Lake		7729.05	425.273	1.36431	2959.73	4	10.1528	8.67762
2433	46852531	Ryder Lake	Yes	85836.5	1504.42	1.44824	3238.63	17	10.1884	8.70805
1248	58224224	Walk-Up Lake		69790.8	1191.71	1.27226	3389.33	17	10.2073	8.7242
246	58227432	Lily Pad Lake		4880.31	285.299	1.15182	3127.64	3	10.21	8.72649
802	72155353	Round Lake		17895.8	503.501	1.06153	3033.07	11	10.2275	8.74145
3008	72140159	Abes Lake		78995.1	1105.76	1.10961	2994.68	19	10.2757	8.78264
1148	72130441	East Shingle Creek Lake		26380.9	636.03	1.10444	2958.39	13	10.3251	8.82491
2986	72132829	Rhoads Lake		18750	612.457	1.26149	3093.89	10	10.3589	8.85373
2879	75284105	Red Lake		78365.5	1536.32	1.54785	3003.86	17	10.7951	9.22657
4661	72130271	Jean Lake		13681.2	679.481	1.63841	3072.56	7	10.9328	9.3443
4144	58224332	Ouray Lake		3130.6	224.391	1.1311	3168.4	2	10.95	9.35896
4963	35210814	Upper Red Castle Lake		104241	1289.81	1.12671	3519.77	22	11.1605	9.53888
749	72130563	Lower Shingle Creek Lake		10968.9	795.714	2.14281	2934.85	4	11.2462	9.61213
2881	75294563	Lower Teepee		15509.1	720.815	1.63244	2871.55	9	11.6414	9.94991
5784	58226652	Deer Lake		33363.9	975.761	1.50665	3128.23	14	11.6549	9.96148
3503	75273255	Tamarack Lake		304387	2941.43	1.50367	3180.53	27	12.006	10.2615
2312	82733699	Weir Reservoir		3776.26	274.639	1.26049	3047.28	4	12.0069	10.2623
37	82733765	Rock Lake		2927.38	205.859	1.0731	3143.96	4	12.0227	10.2758
2298	82733609	Fire Lake		37693.8	830.859	1.20698	3105.32	18	12.4355	10.6286
15	82733581	Big Elk Lake		128890	1427.21	1.12121	3055.67	26	12.7097	10.863
4946	35210790	Red Castle Lake		671955	5595.78	1.9253	3445.14	31	12.9655	11.0817
2520	58227478	Kidney Lake		765677	4675.25	1.50692	3131.02	34	13.0478	11.1519
3994	82733633	Diamond Lake		15278.1	545.093	1.24378	3020.36	14	13.166	11.253
783	82733483	Wall Lake		288791	2500.69	1.31243	3092.28	30	13.1884	11.2721
245	58227320	Milk Lake		6100.72	281.754	1.01739	3154.71	11	13.3836	11.4389
6141	75296717	Pollen Lake		92903.6	2100.7	1.94381	3125.75	23	14.7209	12.582
540	58227512	Davis Park		662.869	98.748	1.08174	3043.26	2	15.5834	13.3191
5128	58226350	Wall Lake		21620.1	773.641	1.48395	3312.03	30	21.8807	18.7014
4875	58224692	Crater Lake		115719	1446.69	1.19945	3436.15	45	23.9942	20.5078

## Sheet: All Lakes
Supplemental Table 3: All Lakes Carbon Estimates
									kg of C	kg of C	kg of C	kg of C	kg of C	kg of C
FID	Permanent_ID	GNIS_Name	Cored?	Area	Perimeter	Complexity	Elevation	Depth	based on median of	based on mean of	based on bottom 25% of	based on median of	based on mean of	based on bottom 25% of
--	--	--	--	m2	m	--	m	m	cored lakes	cored lakes	cored lakes	lakes with depths	lakes with depths	lakes with depths
2433	46852531	Ryder Lake	Yes	85836.5	1504.42	1.44824	3238.63	17	1.05343e+06	1.41222e+06	1.43497e+06	1.30708e+06	1.36373e+06	1.7339e+06
5151	58224614	Taylor Lake	Yes	90064.1	1337.32	1.25681	3420.53	16	1.10531e+06	1.48178e+06	1.50565e+06	1.37145e+06	1.43089e+06	1.8193e+06
235	35189846	Dead Horse Lake	Yes	57754.8	1190.29	1.39691	3317.25	13	708796	950211	965516	879461	917579	1.16665e+06
125	58225236	Marshall Lake	Yes	80319.1	1169.29	1.16364	3045.52	11	985716	1.32145e+06	1.34273e+06	1.22306e+06	1.27607e+06	1.62245e+06
100	58225742	Pyramid Lake	Yes	58800.6	995.926	1.15836	2960.38	11	721631	967418	983000	895387	934195	1.18777e+06
1896	58227602	Upper Lily Pad	Yes	39925.6	799.733	1.12883	3127.43	11	489987	656876	667456	607967	634318	806497
493	75276491	Island Lake	Yes	452768	4423	1.8539	3286.53	10	5.5566e+06	7.44917e+06	7.56915e+06	6.89453e+06	7.19335e+06	9.14592e+06
3324	35210536	Lower Red Castle Lake	Yes	176020	2456.72	1.65151	3280.77	9	2.16021e+06	2.89598e+06	2.94262e+06	2.68035e+06	2.79653e+06	3.55561e+06
331	58226550	Swasey Lake	Yes	146211	2073.17	1.52916	3267.57	9	1.79437e+06	2.40554e+06	2.44428e+06	2.22643e+06	2.32293e+06	2.95346e+06
4944	58225834	Spider Lake	Yes	81115.1	2413.56	2.39009	3316.67	9	995485	1.33455e+06	1.35604e+06	1.23518e+06	1.28872e+06	1.63853e+06
4039	58225152	Hoover Lake	Yes	78126.7	1168.14	1.1787	3019.13	9	958810	1.28538e+06	1.30608e+06	1.18967e+06	1.24124e+06	1.57816e+06
2024	58224588	Elbow Lake	Yes	100101	2011.57	1.79318	3332.9	8	1.2285e+06	1.64692e+06	1.67345e+06	1.5243e+06	1.59036e+06	2.02205e+06
1780	58225000	Little Superior Lake	Yes	60107.2	1039.96	1.19635	3417.87	7	737666	988914	1.00484e+06	915283	954954	1.21417e+06
3308	35210292	Bald Lake	Yes	22404.6	731.614	1.37855	3365.87	7	274960	368611	374548	341166	355953	452572
345	58224472	North Star Lake	Yes	57813.6	940.142	1.10277	3474.97	5	709518	951179	966499	880357	918514	1.16784e+06
1818	35210286	Lake Hessie	Yes	53423.8	998.981	1.21898	3237.87	5	655644	878955	893113	813511	848771	1.07916e+06
1663	46846117	Ostler Lake	Yes	52819.1	1047.51	1.2855	3214.2	4	648223	869007	883004	804303	839164	1.06695e+06
536	58224678	Reader Lake	Yes	47557.8	1177.87	1.52333	3310.53	4	583653	782445	795048	724187	755575	960668
150	46852463	Kermsuh Lake	Yes	39084.7	1106.69	1.57882	3141.44	4	479667	643041	653399	595163	620959	789511
4875	58224692	Crater Lake		115719	1446.69	1.19945	3436.15	45	1.42016e+06	1.90387e+06	1.93453e+06	1.76211e+06	1.83849e+06	2.33753e+06
2520	58227478	Kidney Lake		765677	4675.25	1.50692	3131.02	34	9.39678e+06	1.25973e+07	1.28002e+07	1.16594e+07	1.21647e+07	1.54667e+07
4946	35210790	Red Castle Lake		671955	5595.78	1.9253	3445.14	31	8.24656e+06	1.10553e+07	1.12334e+07	1.02322e+07	1.06757e+07	1.35735e+07
783	82733483	Wall Lake		288791	2500.69	1.31243	3092.28	30	3.54418e+06	4.75133e+06	4.82786e+06	4.39756e+06	4.58816e+06	5.83357e+06
5128	58226350	Wall Lake		21620.1	773.641	1.48395	3312.03	30	265332	355704	361433	329220	343489	436725
3503	75273255	Tamarack Lake		304387	2941.43	1.50367	3180.53	27	3.73559e+06	5.00793e+06	5.08859e+06	4.63506e+06	4.83595e+06	6.14862e+06
15	82733581	Big Elk Lake		128890	1427.21	1.12121	3055.67	26	1.5818e+06	2.12056e+06	2.15472e+06	1.96267e+06	2.04774e+06	2.60358e+06
6141	75296717	Pollen Lake		92903.6	2100.7	1.94381	3125.75	23	1.14016e+06	1.5285e+06	1.55312e+06	1.41469e+06	1.47601e+06	1.87665e+06
744	58227964	Moon Lake		3.10523e+06	12998.2	2.08039	2465.32	22.25	3.8109e+07	5.10889e+07	5.19117e+07	4.72849e+07	4.93344e+07	6.27257e+07
4963	35210814	Upper Red Castle Lake		104241	1289.81	1.12671	3519.77	22	1.27929e+06	1.71502e+06	1.74264e+06	1.58732e+06	1.65612e+06	2.10566e+06
3984	82733719	Washington Lake		391877	2736.34	1.23283	3043.48	21	4.80931e+06	6.44736e+06	6.55121e+06	5.96731e+06	6.22595e+06	7.91592e+06
1515	82733671	Trial Lake		262318	2250.8	1.23945	2994.68	21	3.2193e+06	4.31578e+06	4.3853e+06	3.99445e+06	4.16757e+06	5.29882e+06
1085	75288927	Cliff Lake		133552	1548.93	1.1954	3489.57	21	1.63902e+06	2.19727e+06	2.23266e+06	2.03367e+06	2.12181e+06	2.69776e+06
3008	72140159	Abes Lake		78995.1	1105.76	1.10961	2994.68	19	969467	1.29967e+06	1.3206e+06	1.2029e+06	1.25503e+06	1.5957e+06
214	46882443	Amethyst Lake		170621	2120.25	1.4477	3278.36	18	2.09395e+06	2.80715e+06	2.85236e+06	2.59813e+06	2.71074e+06	3.44655e+06
4255	35210732	East Red Castle Lake		82934.5	1145.74	1.12209	3412.47	18	1.01781e+06	1.36448e+06	1.38646e+06	1.26289e+06	1.31762e+06	1.67528e+06
2298	82733609	Fire Lake		37693.8	830.859	1.20698	3105.32	18	462597	620158	630147	573983	598861	761415
4707	72140367	Notch Lake		78488.3	1275.43	1.284	3142.35	17	963247	1.29133e+06	1.31213e+06	1.19518e+06	1.24698e+06	1.58546e+06
2879	75284105	Red Lake		78365.5	1536.32	1.54785	3003.86	17	961741	1.28931e+06	1.31008e+06	1.19331e+06	1.24503e+06	1.58298e+06
1248	58224224	Walk-Up Lake		69790.8	1191.71	1.27226	3389.33	17	856508	1.14823e+06	1.16673e+06	1.06274e+06	1.1088e+06	1.40977e+06
3507	58224910	Chepeta Lake		564410	4429.14	1.66276	3220.43	17	6.92672e+06	9.28595e+06	9.43552e+06	8.59455e+06	8.96706e+06	1.14011e+07
3514	58226522	Cliff Lake		246339	2339.56	1.32946	3155.76	17	3.0232e+06	4.0529e+06	4.11818e+06	3.75113e+06	3.91371e+06	4.97605e+06
6065	75273279	Jessen Lake		97227.7	1343.07	1.21482	3169.23	17	1.19323e+06	1.59964e+06	1.6254e+06	1.48053e+06	1.54471e+06	1.964e+06
2640	58225624	Upper Carroll Lake		116179	1362.2	1.12716	3396.53	15	1.4258e+06	1.91143e+06	1.94222e+06	1.76911e+06	1.84579e+06	2.34681e+06
3122	58226658	Marsell Lake		61727.5	1170.53	1.32877	3192.53	15	757551	1.01557e+06	1.03193e+06	939955	980695	1.2469e+06
3753	72130263	Anchor Lake		58811.8	1138.29	1.32382	3164.87	15	721768	967602	983187	895557	934373	1.188e+06
4899	58227050	Clement Lake		291417	3273.18	1.71009	3185.03	15	3.57641e+06	4.79454e+06	4.87176e+06	4.43755e+06	4.62988e+06	5.88662e+06
2521	58227434	Island Lake		268381	2309.94	1.25757	3125.82	15	3.2937e+06	4.41553e+06	4.48665e+06	4.08677e+06	4.2639e+06	5.42129e+06
5720	58225170	Doll Lake		176262	1864.08	1.25225	3461.77	14	2.16317e+06	2.89995e+06	2.94666e+06	2.68403e+06	2.80036e+06	3.56049e+06
2638	58225716	West Timothy Lake		150055	1738.98	1.26613	3384.63	14	1.84155e+06	2.46879e+06	2.50855e+06	2.28497e+06	2.384e+06	3.03112e+06
3997	72140167	Meadow Lake		120204	1416.74	1.15249	2994.68	14	1.47521e+06	1.97766e+06	2.00951e+06	1.83041e+06	1.90975e+06	2.42813e+06
5531	46852495	McPheters Lake		111064	2253.72	1.90731	3311.73	14	1.36304e+06	1.82728e+06	1.85672e+06	1.69123e+06	1.76453e+06	2.2435e+06
4798	58226420	Palisade Lake		98889.5	1403.82	1.25906	3092.33	14	1.21362e+06	1.62698e+06	1.65319e+06	1.50584e+06	1.57111e+06	1.99757e+06
4161	58227120	Rudolph Lake		98416.7	1322.57	1.18903	3192.82	14	1.20782e+06	1.6192e+06	1.64528e+06	1.49864e+06	1.5636e+06	1.98802e+06
4859	58226924	Diamond Lake		52155.3	966.556	1.19367	3116.65	14	640076	858085	871906	794195	828617	1.05354e+06
5784	58226652	Deer Lake		33363.9	975.761	1.50665	3128.23	14	409458	548920	557761	508049	530069	673951
1215	58225468			32267.3	676.809	1.06266	3409.41	14	396000	530878	539429	491350	512647	651799
2722	58224386	Fox Lake		356821	3645.89	1.72141	3287.23	14	4.37909e+06	5.8706e+06	5.96516e+06	5.4335e+06	5.669e+06	7.20779e+06
377	35180994	China Lake		109600	1916.74	1.63292	2869.26	14	1.34507e+06	1.8032e+06	1.83224e+06	1.66894e+06	1.74128e+06	2.21393e+06
4833	58227258	Docs Lake		70134.7	1215.72	1.29471	3014.53	14	860728	1.15389e+06	1.17248e+06	1.06798e+06	1.11426e+06	1.41672e+06
6059	58225938	Hidden Lake		53111.2	981.55	1.20123	3152.87	14	651807	873811	887886	808750	843804	1.07285e+06
792	82733705	Lost Lake Number Two/Teapot		53073.2	955.617	1.16991	3025.18	14	651341	873187	887251	808172	843201	1.07208e+06
3994	82733633	Diamond Lake		15278.1	545.093	1.24378	3020.36	14	187501	251364	255412	232648	242731	308618
2669	58226078	Upper Chain Lake		198686	1842.77	1.16599	3239.73	13	2.43837e+06	3.26887e+06	3.32153e+06	3.02548e+06	3.15662e+06	4.01345e+06
4082	58226790	Betsy Lake		132769	2007.77	1.55408	3153.23	13	1.6294e+06	2.18437e+06	2.21956e+06	2.02173e+06	2.10936e+06	2.68192e+06
5603	58225508	Dean Lake		94424.1	1470.7	1.34987	3281.33	13	1.15882e+06	1.55351e+06	1.57853e+06	1.43784e+06	1.50016e+06	1.90737e+06
1558	58225456	Echo Lake		75803.7	1187.72	1.21668	2970.38	13	930301	1.24716e+06	1.26725e+06	1.1543e+06	1.20433e+06	1.53124e+06
5467	72155365	Sand Lake		75905.6	1308.86	1.33987	3092.26	13	931552	1.24884e+06	1.26895e+06	1.15585e+06	1.20595e+06	1.53329e+06
822	72140181	Kamas Lake		69443.4	1041.48	1.11466	3203.74	13	852245	1.14252e+06	1.16092e+06	1.05745e+06	1.10328e+06	1.40276e+06
3535	58225956	Wooley Lakes		65522.8	1102.01	1.21422	3236.66	13	804128	1.07801e+06	1.09538e+06	997748	1.04099e+06	1.32356e+06
1148	72130441	East Shingle Creek Lake		26380.9	636.03	1.10444	2958.39	13	323760	434033	441023	401716	419127	532895
889	58226150	Pine Island Lake		332838	4217.02	2.06156	3141.03	13	4.08476e+06	5.47602e+06	5.56422e+06	5.06829e+06	5.28797e+06	6.72333e+06
5139	58225276	Queant Lake		224111	2472.75	1.47318	3248.43	13	2.75041e+06	3.68719e+06	3.74658e+06	3.41266e+06	3.56057e+06	4.52705e+06
5796	58225194	Lake Atwood		831264	5206.64	1.61063	3363.83	12.2	1.02017e+07	1.36764e+07	1.38967e+07	1.26581e+07	1.32067e+07	1.67915e+07
1005	58227534	Brown Duck Lake		128675	1528.2	1.20154	3106.32	12	1.57917e+06	2.11703e+06	2.15113e+06	1.9594e+06	2.04433e+06	2.59924e+06
5795	58225430	Roberts Lake		91433.5	1263.72	1.1787	3519.03	12	1.12212e+06	1.50431e+06	1.52854e+06	1.3923e+06	1.45265e+06	1.84696e+06
4670	82733543	Island Lake		89825.4	1995.31	1.87767	3092.27	12	1.10238e+06	1.47785e+06	1.50166e+06	1.36782e+06	1.4271e+06	1.81447e+06
4435	58227008	Lower Rock Lake		77621.6	1218.54	1.23355	3214.07	12	952611	1.27707e+06	1.29764e+06	1.18198e+06	1.23321e+06	1.56796e+06
4550	40036305	Fish Lake		67803	1082.91	1.17294	3275.26	12	832112	1.11553e+06	1.1335e+06	1.03247e+06	1.07722e+06	1.36962e+06
4353	58225924	Oke Doke Lake		49530.9	940.928	1.19241	3445.53	12	607868	814907	828033	754232	786922	1.00052e+06
3164	58226952	Grandaddy Lake		680788	5999.57	2.05079	3141.03	12	8.35497e+06	1.12007e+07	1.13811e+07	1.03667e+07	1.0816e+07	1.37519e+07
2676	58226332	Lower Chain Lake		243914	2592.13	1.48028	3226.43	12	2.99344e+06	4.013e+06	4.07764e+06	3.71421e+06	3.87519e+06	4.92707e+06
5468	72155379	Fish Lake		202579	3138.4	1.96661	3114.74	12	2.48615e+06	3.33292e+06	3.38661e+06	3.08477e+06	3.21847e+06	4.09209e+06
5131	75276755	Round Lake		94931.5	1223.56	1.12003	3239.33	12	1.16505e+06	1.56186e+06	1.58702e+06	1.44557e+06	1.50822e+06	1.91762e+06
4408	58223996	Divide Lake		76691.7	1155.49	1.17679	3420.63	12	941199	1.26177e+06	1.28209e+06	1.16782e+06	1.21844e+06	1.54917e+06
3078	58224388			215088	2267.67	1.37905	3055.68	11	2.63967e+06	3.53874e+06	3.59573e+06	3.27525e+06	3.41721e+06	4.34478e+06
3170	58225796	Pinto Lake		184762	2604.85	1.70916	3055.73	11	2.26749e+06	3.03979e+06	3.08876e+06	2.81346e+06	2.9354e+06	3.73219e+06
1851	58225898	East Timothy Lake		168649	1823.71	1.25248	3360.43	11	2.06974e+06	2.77469e+06	2.81938e+06	2.5681e+06	2.6794e+06	3.4067e+06
4200	58227292	Atwine Lake		127697	1573.44	1.24184	3091.32	11	1.56716e+06	2.10093e+06	2.13477e+06	1.94451e+06	2.02879e+06	2.57948e+06
984	58227318	Tworoose Lake		87259.7	1401.38	1.338	3140.93	11	1.07089e+06	1.43564e+06	1.45876e+06	1.32875e+06	1.38634e+06	1.76265e+06
66	82733565	Star Lake		75209	1269.79	1.30589	3044.58	11	923003	1.23738e+06	1.25731e+06	1.14525e+06	1.19488e+06	1.51922e+06
4792	58224610	Blue Lake		70656.3	1128.24	1.19711	3336.13	11	867129	1.16247e+06	1.1812e+06	1.07592e+06	1.12255e+06	1.42726e+06
2792	58226574	Watkins Lake		63155.2	1861.45	2.08907	3157.86	11	775072	1.03906e+06	1.0558e+06	961696	1.00338e+06	1.27574e+06
5036	58223974	Milk Lake		55619.5	994.996	1.18991	3426.46	11	682591	915080	929819	846946	883655	1.12351e+06
1158	58227832	Heller Lake		32945.3	913.335	1.41919	2911.06	11	404321	542032	550762	501674	523418	665494
5770	75294291	Bear Lake		68396.1	1061.37	1.14461	3283.57	11	839392	1.12529e+06	1.14341e+06	1.0415e+06	1.08664e+06	1.3816e+06
802	72155353	Round Lake		17895.8	503.501	1.06153	3033.07	11	219627	294431	299174	272509	284320	361496
245	58227320	Milk Lake		6100.72	281.754	1.01739	3154.71	11	74871.1	100372	101989	92898.7	96925.2	123235
4231	58225854	Bluebell Lake		154857	1947.52	1.3958	3322.17	10	1.90048e+06	2.54779e+06	2.58882e+06	2.35809e+06	2.46029e+06	3.12811e+06
5146	58226740	Upper Rock Lake		139106	2138.56	1.61717	3230.07	10	1.70718e+06	2.28864e+06	2.3255e+06	2.11824e+06	2.21005e+06	2.80994e+06
4860	58226320	Shamrock Lake		62808.3	972.99	1.09498	3160.95	10	770815	1.03335e+06	1.05e+06	956413	997867	1.26873e+06
2340	46878227	Beaver Lake		55487	928.867	1.11216	2873.48	10	680964	912900	927604	844929	881550	1.12084e+06
2385	58225106	Shepard Lake		55953.3	893.994	1.06593	3044.65	10	686687	920572	935399	852029	888958	1.13026e+06
5785	58226834	Grayling Lake		35048.9	795.355	1.19821	3042.43	10	430137	576642	585930	533707	556839	707987
3314	58227246	Toquer Lake		34390	800.054	1.21678	3192.97	10	422052	565802	574916	523674	546372	694679
3118	58227492	Hades Lake		19962.3	553.725	1.10534	3046.73	10	244987	328429	333719	303975	317151	403238
2986	72132829	Rhoads Lake		18750	612.457	1.26149	3093.89	10	230109	308484	313452	285515	297890	378749
1126	58225318	Allred Lake		130589	1821.3	1.42146	3347.33	9	1.60266e+06	2.14852e+06	2.18313e+06	1.98855e+06	2.07474e+06	2.6379e+06
4791	58226544	Fish Hatchery Lake		122485	1692.73	1.36412	3117.52	9	1.5032e+06	2.01519e+06	2.04765e+06	1.86514e+06	1.94598e+06	2.4742e+06
35	82733979	Alexander Lake		96149.8	1250.7	1.13759	2848.3	9	1.18e+06	1.5819e+06	1.60738e+06	1.46412e+06	1.52758e+06	1.94223e+06
4109	58224718	Jordan Lake		92463.1	1604.94	1.48862	3238.63	9	1.13475e+06	1.52125e+06	1.54575e+06	1.40798e+06	1.46901e+06	1.86775e+06
911	58226886	Lodgepole Lake		77499.7	1425.61	1.44431	3096.13	9	951115	1.27506e+06	1.2956e+06	1.18013e+06	1.23128e+06	1.56549e+06
46	82733795	Haystack Lake		74559.1	1070.54	1.10576	3031.28	9	915026	1.22668e+06	1.24644e+06	1.13535e+06	1.18456e+06	1.50609e+06
2506	58224794	Phinney Lake		62876.5	1178.2	1.32521	3240.15	9	771652	1.03448e+06	1.05114e+06	957452	998950	1.2701e+06
3140	58225910	Margo Lake		61847.5	1021.57	1.15854	3177.63	9	759024	1.01755e+06	1.03394e+06	941783	982602	1.24932e+06
378	58226104			49500.2	985.137	1.24882	3329.77	9	607491	814402	827519	753764	786434	999904
1720	58225230	Upper Ottoson Lake		46363.9	991.118	1.2982	3388.95	9	569002	762803	775089	706007	736607	936552
436	58224036	Verlie Lake		40608.6	1054.15	1.47537	3325.93	9	498369	668113	678874	618367	645169	820293
4656	82733733	Little Elk Lake		40353.4	945.844	1.32797	2986.87	9	495237	663914	674608	614481	641115	815139
4747	46858687	Ruth Lake		38718.4	801.213	1.14841	3155.03	9	475172	637014	647275	589584	615139	782112
320	58226548			36681.4	779.269	1.14755	3347.17	9	450172	603501	613221	558566	582776	740964
3996	72140279	Ibantik Lake		36180.4	777.468	1.1528	3080.88	9	444023	595257	604845	550936	574815	730843
5626	58224056	Reconnaissance Lake		32710.1	767.444	1.19678	3401.85	9	401434	538162	546831	498093	519681	660743
4955	58226482	Swasey Lakes		26909.7	748.319	1.28659	3296.57	9	330249	442731	449862	409767	427527	543575
5106	72156629	Castle Lake		25955.2	618.651	1.08303	3009.73	9	318535	427028	433906	395233	412364	524296
5651	35219196	Bobs Lake		24496.5	630.518	1.1362	3394.48	9	300633	403029	409520	373020	389188	494829
5300	75284075	Tepee Lakes		24265.9	578.945	1.04821	2875.11	9	297803	399235	405665	369509	385524	490171
1275	75294491	Daggett Lake		162556	2250.25	1.57411	3190.47	9	1.99497e+06	2.67445e+06	2.71753e+06	2.47532e+06	2.58261e+06	3.28363e+06
4179	35205128	Lyman Lake		149895	1932.11	1.40749	2839.62	9	1.83959e+06	2.46615e+06	2.50587e+06	2.28253e+06	2.38146e+06	3.02788e+06
1161	75276479	Beaver Lake		144577	1647.64	1.22214	3203.63	9	1.77432e+06	2.37866e+06	2.41697e+06	2.20155e+06	2.29697e+06	2.92046e+06
4349	58225616	Carrot Lake		130642	1586.97	1.23833	3298.53	9	1.60331e+06	2.14939e+06	2.18401e+06	1.98935e+06	2.07558e+06	2.63897e+06
5767	75294637	Lake Blanchard		121817	1918.96	1.55067	3404.57	9	1.495e+06	2.0042e+06	2.03648e+06	1.85497e+06	1.93537e+06	2.46071e+06
4366	75276707	Coffin Lake		105950	1487.45	1.28884	3309.73	9	1.30028e+06	1.74315e+06	1.77123e+06	1.61336e+06	1.68329e+06	2.1402e+06
4357	58225964	Fourth Chain Lake		57549.2	898.529	1.05638	3310.43	9	706273	946829	962079	876331	914313	1.16249e+06
4445	58227294	Larvae Lake		21826.3	594.873	1.13564	3055.07	9	267864	359098	364882	332361	346766	440892
576	75294521	Weyman Lakes/Candy		21352.7	657.12	1.26831	3138.07	9	262051	351306	356964	325149	339241	431325
5413	82733695	Pot Reservoir		16536.8	531.131	1.16489	3033.54	9	202948	272071	276454	251814	262728	334043
2881	75294563	Lower Teepee		15509.1	720.815	1.63244	2871.55	9	190336	255164	259274	236165	246401	313285
335	58225132	Superior Lake		146022	2291.5	1.69129	3404.17	8	1.79205e+06	2.40242e+06	2.44111e+06	2.22354e+06	2.31992e+06	2.94963e+06
5418	82733573	Long Lake		133494	2135.44	1.6484	3080.08	8	1.63831e+06	2.19632e+06	2.23169e+06	2.03278e+06	2.12089e+06	2.69659e+06
2481	58225572	Thompson Lake		87100.4	1274.17	1.21766	3259.95	8	1.06894e+06	1.43302e+06	1.4561e+06	1.32632e+06	1.38381e+06	1.75943e+06
93	72132837	Cuberant Lake		78303.2	1670.13	1.68332	3177.58	8	960976	1.28828e+06	1.30903e+06	1.19236e+06	1.24404e+06	1.58172e+06
938	58225676	Dale Lake		57249.8	1196.94	1.41089	3263.04	8	702598	941902	957073	871771	909556	1.15645e+06
2032	58224730	Moccasin Lake		48207.3	1280.76	1.6452	3238.43	8	591624	793131	805906	734077	765894	973788
4345	58227168			41283.8	1204.87	1.67247	3262.33	8	506656	679222	690163	628650	655897	833934
1294	75294595			38930.1	1026.11	1.46676	3286.47	8	477770	640498	650814	592808	618502	786388
4858	58227708	Audry Lake		36875	844.939	1.24099	3056.32	8	452548	606685	616457	561514	585851	744874
1234	75273293	Burnt Fork Lake		37307.9	727.95	1.06294	3238.53	8	457861	613808	623695	568106	592729	753619
760	82733789	Hidden Lake		34513.6	907.408	1.37757	2971.37	8	423568	567835	576981	525556	548335	697175
773	82733833	Blue Lake		34627.2	740.387	1.12217	3045.89	8	424963	569705	578881	527286	550140	699470
1835	58225996			32542.3	760.803	1.18948	3344.07	8	399376	535403	544027	495538	517016	657355
2065	75294539	Weyman Lakes		32979.3	797.218	1.23812	3163.97	8	404739	542592	551332	502193	523959	666183
2558	35209558			30827.8	711.867	1.1435	3402.75	8	378334	507194	515364	469430	489777	622722
602	75294793	Lamb Lakes		24600.2	671.826	1.20808	3164.57	8	301906	404735	411254	374600	390836	496925
5042	58227448	Crow Lake		73798.3	1570.92	1.63094	3140.43	8	905690	1.21417e+06	1.23372e+06	1.12376e+06	1.17247e+06	1.49073e+06
2636	75276959	Alligator Lake		66425.7	1336.56	1.46261	3059.72	8	815209	1.09287e+06	1.11047e+06	1.0115e+06	1.05534e+06	1.3418e+06
3954	35180584	Grahams Reservoir		26071.3	688.942	1.2034	2809.37	8	319960	428939	435847	397001	414208	526641
2550	58227330	Aspen Lake		30984.5	719.123	1.15223	3128.32	8	380258	509773	517984	471817	492267	625888
5669	35205164	Little Lyman Lake		26003.9	992.637	1.73612	2829.52	8	319133	427829	434720	395974	413137	525279
1572	58224862	Fehr Lake		21706.3	549.265	1.05147	3131.44	8	266390	357122	362874	330532	344858	438466
3508	75273229	Hidden Lake (Sheep Creek)		17621.8	549.835	1.16819	3128.53	8	216263	289922	294592	268336	279966	355960
962	58224366	Jill Lake		16870.4	527.168	1.14471	3192.55	8	207042	277560	282031	256894	268028	340782
3367	58226076	Farmers Lake		195607	2236.02	1.4259	3345.37	7	2.40059e+06	3.21822e+06	3.27006e+06	2.9786e+06	3.10771e+06	3.95126e+06
3136	58226806	Mohawk Lake		192176	2008.28	1.29206	3168.23	7	2.35848e+06	3.16178e+06	3.21271e+06	2.92637e+06	3.0532e+06	3.88196e+06
5156	75273253	Fish Lake		153117	2960.39	2.13375	3258.53	7	1.87913e+06	2.51916e+06	2.55974e+06	2.33159e+06	2.43265e+06	3.09297e+06
2715	58224494	Crescent Lake		121824	2338.55	1.88968	3302.4	7	1.49508e+06	2.0043e+06	2.03659e+06	1.85507e+06	1.93547e+06	2.46084e+06
929	58225584	Jean Lake		91416.6	1355.18	1.26413	3279.13	7	1.12191e+06	1.50403e+06	1.52826e+06	1.39205e+06	1.45238e+06	1.84662e+06
4855	58224268	Continent Lake		81532	1353.3	1.33671	3441.35	7	1.0006e+06	1.3414e+06	1.36301e+06	1.24153e+06	1.29534e+06	1.64695e+06
3208	58224150	Lightning Lake		63894.9	1153.06	1.28655	3300.97	7	784150	1.05123e+06	1.06816e+06	972959	1.01513e+06	1.29068e+06
3230	46867129	Allsop Lake		51483.6	1037.5	1.28962	3225.75	7	631833	847035	860678	783967	817946	1.03997e+06
2108	40036329	Twin Lakes		50862.9	1058.53	1.32377	3140.96	7	624214	836821	850300	774514	808084	1.02743e+06
5214	40035485			42929.7	1173.79	1.59779	3300.95	7	526855	706301	717678	653712	682046	867180
1340	75284153			35900.5	934.76	1.39142	2973.36	7	440589	590653	600167	546675	570369	725190
5676	58226900	Stewart Lake		34080.6	677.988	1.0358	3211.24	7	418254	560711	569742	518962	541456	688428
3364	35181086	Sargent Lake		32529.1	745.983	1.16654	2953.66	7	399214	535186	543806	495338	516807	657089
898	58226688	Shadow Lake		30658.4	806.202	1.2986	3033.57	7	376255	504407	512531	466850	487085	619299
1846	58225986			26449.9	663.396	1.15045	3356.87	7	324607	435168	442177	402766	420223	534289
5428	82733791	Azure Lake		24421.7	663.246	1.197	3095.36	7	299715	401797	408269	371881	387999	493318
5439	82733465	North Twin Lake		22445.8	600.825	1.13107	3179.64	7	275466	369290	375238	341794	356608	453405
1529	82733727	Lost Lake		250773	2294.96	1.29254	3019.08	7	3.07761e+06	4.12584e+06	4.1923e+06	3.81865e+06	3.98416e+06	5.06561e+06
4661	72130271	Jean Lake		13681.2	679.481	1.63841	3072.56	7	167903	225090	228715	208330	217360	276360
2680	58223946	Rainbow Lake		140150	1583.78	1.19318	3394.23	6	1.71999e+06	2.30582e+06	2.34296e+06	2.13414e+06	2.22663e+06	2.83103e+06
1668	58225780	Daynes Lake		92647.3	1305.97	1.21011	3250.83	6	1.13701e+06	1.52428e+06	1.54883e+06	1.41079e+06	1.47193e+06	1.87148e+06
1723	58226594	Horseshoe Lake		86480.3	1893.93	1.81641	3269.74	6	1.06133e+06	1.42282e+06	1.44573e+06	1.31688e+06	1.37396e+06	1.7469e+06
5588	58227018	Fern Lake		76650.9	1204.7	1.22724	3019.13	6	940699	1.2611e+06	1.28141e+06	1.1672e+06	1.21779e+06	1.54835e+06
383	75294559	Henrys Fork Lake		69520.9	1278.55	1.36763	3298.87	6	853195	1.14379e+06	1.16221e+06	1.05863e+06	1.10451e+06	1.40432e+06
1219	58225734	Point Lake		63480.3	1440.13	1.61209	3262.07	6	779062	1.04441e+06	1.06123e+06	966647	1.00854e+06	1.2823e+06
3363	58225532	Milk Lake		62896.9	1328.91	1.49447	3350.77	6	771902	1.03481e+06	1.05148e+06	957762	999274	1.27052e+06
5490	58225436	Joan Lake		62384.1	1417.48	1.60062	3069.7	6	765608	1.02637e+06	1.04291e+06	949953	991127	1.26016e+06
3742	58228360	Heart Lake		61149.6	1186.28	1.353	2788.51	6	750459	1.00606e+06	1.02227e+06	931156	971515	1.23522e+06
2031	58224530	Papoose Lake		56166.8	1459.03	1.73633	3250.43	6	689306	924084	938968	855279	892349	1.13457e+06
5437	82733469	Clyde Lake		55766.2	1291.07	1.54196	3177.58	6	684391	917494	932272	849180	885986	1.12648e+06
4420	58224898			54982.9	994.911	1.19668	3323.33	6	674778	904606	919177	837252	873541	1.11065e+06
1273	58225648	Teds Lake		55237.7	1043.47	1.25219	3152.07	6	677905	908798	923436	841132	877589	1.1158e+06
224	46867093	Lake Lorena		46774.2	1159.4	1.51195	3227.13	6	574037	769553	781948	712255	743126	944839
220	46867143	Priord Lake		43172.7	1103.8	1.49828	3312.08	6	529837	710300	721740	657413	685907	872089
38	82733777	Shadow Lake		41131.4	851.17	1.18369	3068.41	6	504785	676714	687614	626329	653475	830854
3377	58225718	East Carroll Lake		33933	870.289	1.33248	3420.33	6	416443	558283	567276	516715	539111	685447
3627	40036519			31695.5	762.292	1.20762	3299.56	6	388983	521470	529869	482643	503562	640248
4000	58227402	Iron Mine Lake		29152.9	681.819	1.12625	2923.47	6	357779	479638	487364	443926	463167	588888
5397	72130573	Hourglass Lake		27983.9	941.587	1.5875	3012.87	6	343432	460405	467821	426125	444594	565274
4864	58225962	Rock Lakes		24259.9	668.369	1.21026	3222.05	6	297730	399136	405565	369418	385429	490050
3227	58225752	Young Lake		22373.4	575.72	1.08556	3142.13	6	274578	368099	374028	340692	355458	451944
324	58225416	Five Point Lake		330587	2973.55	1.45861	3357.17	6	4.05713e+06	5.43899e+06	5.52659e+06	5.03402e+06	5.2522e+06	6.67786e+06
2632	35180910	Marsh Lake		144473	2229.65	1.65444	2846.96	6	1.77305e+06	2.37694e+06	2.41523e+06	2.19997e+06	2.29532e+06	2.91836e+06
4332	75294419	Gilbert Lake		62180.4	1180.76	1.3355	3325.66	6	763109	1.02302e+06	1.0395e+06	946852	987891	1.25604e+06
575	75294577	Lower Anson Lake		52188	1027.13	1.26808	3224.97	6	640477	858623	872452	794692	829136	1.0542e+06
4309	75294287	Sawmill Lake		27851.1	671.111	1.13418	3251.27	6	341802	458220	465600	424102	442484	562591
2374	46878339	Whiskey Island Lake		19861.3	760.618	1.5222	3154.69	6	243748	326768	332031	302438	315546	401198
5563	58227176	Heart Lake		19300.9	594.907	1.20772	3204.1	6	236870	317548	322663	293904	306643	389878
1482	120030840	Ramona Lake		18640.3	642.369	1.32698	3155.8	6	228763	306680	311619	283845	296148	376534
1581	58225100	Maba Lake		17347.9	486.748	1.04229	3021.4	6	212902	285416	290013	264165	275614	350427
4744	72140175	Lofty Lake		12079.6	426.113	1.09347	3299.33	6	148247	198740	201941	183942	191915	244008
1072	35210776	Smiths Fork Pass Lake		104528	1726.37	1.506	3400.87	5	1.28282e+06	1.71974e+06	1.74744e+06	1.5917e+06	1.66068e+06	2.11146e+06
185	58226538	Powell Lake		100096	1558.97	1.38976	3043.53	5	1.22842e+06	1.64682e+06	1.67335e+06	1.52421e+06	1.59027e+06	2.02193e+06
4103	58226188	Rainbow Lake		71079.9	1364.27	1.44323	3032.05	5	872328	1.16944e+06	1.18828e+06	1.08237e+06	1.12928e+06	1.43581e+06
3179	58226448	Lost Lake		69788.2	1699.05	1.81394	3055.73	5	856475	1.14819e+06	1.16668e+06	1.0627e+06	1.10876e+06	1.40972e+06
5411	82733679	Duck Lake		67699.6	1338.81	1.45122	2982.57	5	830843	1.11383e+06	1.13177e+06	1.03089e+06	1.07558e+06	1.36753e+06
3261	58226770			67057.6	1261.64	1.3741	3243.54	5	822964	1.10326e+06	1.12103e+06	1.02112e+06	1.06538e+06	1.35456e+06
428	58224822			58816.6	930.665	1.08231	3363.76	5	721826	967679	983266	895629	934448	1.18809e+06
4124	58226000	Allen Lake		56202	1014.57	1.20702	3167.45	5	689739	924664	939557	855816	892909	1.13528e+06
2587	58225974			54185.9	1025.27	1.24223	3299.57	5	664997	891494	905853	825116	860879	1.09456e+06
5059	58224876	Painter Lakes		53411.3	1092.16	1.33284	3365.86	5	655490	878749	892903	813320	848572	1.07891e+06
1054	58225590	Gem Lake		48915	923.015	1.17705	3302.67	5	600310	804774	817737	744853	777137	988083
5424	82733895	Spectacle Lake		49252.4	1143.95	1.45379	2973.7	5	604450	810325	823377	749991	782497	994898
4426	58225680			41479.9	992.003	1.37373	3238.57	5	509063	682449	693441	631636	659013	837895
1905	58227584			41677.6	834.074	1.15229	3082.53	5	511488	685700	696745	634645	662153	841887
3609	40035493			41374.7	876.508	1.21534	3290.96	5	507771	680718	691682	630034	657341	835770
4996	58226268			40276.9	1186.26	1.66709	3298.37	5	494299	662656	673330	613317	639900	813594
3570	58227530	Dead Lake		37551.9	1277.93	1.85995	3067.96	5	460855	617822	627773	571821	596605	758547
2345	58226456	Broadhead Lake		36492.5	743.142	1.09718	3032	5	447854	600393	610064	555690	579775	737149
1096	58226384	White Miller Lake		35316.1	776.231	1.16496	3250.53	5	433417	581039	590397	537776	561085	713386
3371	58225884	Center Timothy Lake		34769.4	754.525	1.14125	3360.53	5	426707	572043	581257	529451	552399	702341
5304	40035391	Hacking Lake		33888.2	802.155	1.22897	3240.06	5	415892	557545	566525	516032	538398	684541
5061	58227314	Bollie Lake		34471.4	973.383	1.47864	3250.23	5	423051	567141	576276	524914	547665	696323
905	58224560	LeConte Lake		32621	703.839	1.09909	3330.04	5	400341	536696	545341	496736	518266	658943
347	35210552			31675.1	840.288	1.33161	3315.67	5	388732	521134	529528	482332	503238	639837
399	58224918	Lake George Beard		32459.8	706.621	1.10617	3482.47	5	398362	534044	542646	494281	515704	655687
3272	58224762	Lambert Lake		31230.7	740.76	1.18221	3347.84	5	383278	513823	522099	475565	496177	630860
568	58225036	Pearl Lake		31288.6	882.704	1.40744	3262.57	5	383989	514775	523067	476447	497097	632029
2801	58225434	Dollar Lake		30115.8	800.116	1.30036	3201.57	5	369596	495480	503460	458588	478464	608338
3259	58227104			30310.6	1143.06	1.85174	3201.42	5	371986	498684	506717	461554	481559	612273
3229	58224184	Boot Lake		28203.1	689.753	1.15838	3385.5	5	346122	464011	471485	429462	448076	569702
2641	58224642			28253	732.174	1.22854	3469.26	5	346736	464833	472320	430223	448870	570712
2997	82733717	Marjorie Lake		28186.7	788.463	1.32454	3045.42	5	345922	463742	471212	429213	447817	569372
1990	58225698			26967.4	815.057	1.39983	3323.83	5	330958	443682	450828	410646	428445	544742
4779	58225150	Wyman Lake		26259.9	688.507	1.19831	3048.23	5	322275	432041	439000	399873	417204	530450
4140	58224844	Brinkley Lake		24716.8	653.983	1.17322	3193.26	5	303336	406653	413203	376375	392688	499279
620	40035463	Blue Lake		24189.8	596.834	1.08229	3433.07	5	296870	397983	404393	368350	384316	488634
2605	58224752			23830.3	596.837	1.09043	3435.77	5	292457	392068	398383	362876	378604	481372
4560	40036819			22112.9	917.362	1.73991	3229.65	5	271380	363812	369672	336723	351318	446680
3807	35180878	Bridger Lake		86143.9	1626.92	1.56337	2850.06	5	1.0572e+06	1.41728e+06	1.44011e+06	1.31176e+06	1.36861e+06	1.74011e+06
4531	75294639	Potter Lake		79620.6	1566.57	1.56583	3089.27	5	977144	1.30996e+06	1.33106e+06	1.21242e+06	1.26497e+06	1.60834e+06
4034	72140211	Picturesque/Scout Lake		73922.3	1211.93	1.25718	3168.18	5	907211	1.21621e+06	1.2358e+06	1.12565e+06	1.17444e+06	1.49323e+06
5804	58225422	Allen Lake		65257.4	1194.61	1.31892	3348.43	5	800872	1.07365e+06	1.09094e+06	993707	1.03678e+06	1.3182e+06
2763	58226532	Angel		46796	934.646	1.21857	3173.77	5	574303	769910	782311	712585	743471	945278
6099	40037029	Paul Lake		44130.5	865.262	1.16168	3237.96	5	541591	726057	737751	671997	701123	891435
2646	58224888	U-75		41745.5	801.177	1.10594	3578.66	5	512322	686818	697880	635680	663232	843259
1103	120027883	Dollar Lake		37353.1	722.065	1.05371	3289.11	5	458416	614552	624451	568794	593447	754533
4865	58226028	X-97/Rock Creek 2		32614.5	660.018	1.03076	3220.27	5	400262	536591	545234	496638	518164	658814
6168	40037203	Chimney Rock Lake		26928.9	615.406	1.05769	3211.56	5	330485	443048	450185	410061	427834	543965
5848	75280409	Hidden Lake		22433.1	629.652	1.18567	3096.47	5	275310	369080	375025	341599	356405	453148
991	58227000	Twin Lakes		21515	635.662	1.22226	3230.78	5	264043	353976	359677	327620	341820	434603
5580	58225412	Carolyn Lake		20190.9	626.416	1.24335	3197.54	5	247792	332190	337541	307456	320782	407855
2335	58228260	Blue Lake		17232.6	716.436	1.53925	2603.93	5	211487	283519	288086	262409	273783	348098
3434	58226498	Lily Lake		16118.2	530.92	1.17945	3101.83	5	197810	265184	269455	245439	256077	325587
4182	58227586	Little Dog Lake		16376.6	534.374	1.17772	3116.72	5	200981	269435	273775	249374	260183	330807
3235	58227262	Cabin Lake		15300.8	590.817	1.34711	3190.63	5	187779	251736	255791	232993	243091	309076
2994	72130321	Jerry Lake		11644.3	505.94	1.32236	3120.06	5	142904	191578	194663	177313	184999	235215
4367	75276617	Dine Lake		9035.68	355.525	1.05487	3191.66	5	110890	148660	151054	137591	143554	182521
197	58225918	Bedground Lake		8955.35	434.795	1.29584	3202.89	5	109904	147338	149711	136368	142278	180898
162	58226330	Lily Pad Lake		41365.3	999.75	1.38638	3134.24	4	507656	680563	691525	629890	657191	835579
1272	58225878	Workman Lake		83460	1356.64	1.32444	3189.36	4	1.02426e+06	1.37313e+06	1.39524e+06	1.27089e+06	1.32597e+06	1.68589e+06
253	58226408	Picture Lake		78288.7	1716.26	1.72998	3272.44	4	960799	1.28805e+06	1.30879e+06	1.19214e+06	1.24381e+06	1.58143e+06
5837	58223930			60110.3	1007.46	1.15894	3421.03	4	737703	988964	1.00489e+06	915329	955002	1.21423e+06
5063	58226232	Middle Chain Lake		56619.4	970.962	1.15087	3237.53	4	694861	931530	946534	862171	899540	1.14371e+06
3423	58224070			55220.7	986.073	1.18349	3310.63	4	677696	908519	923152	840873	877319	1.11546e+06
1803	58224578	Tungsten Lake		52597.6	1407.88	1.73137	3460.01	4	645504	865362	879300	800930	835644	1.06247e+06
3301	58226004			52076.3	1211	1.49668	3300.57	4	639107	856786	870586	792993	827363	1.05194e+06
161	58226516	Farney Lake		49472.3	1125.35	1.42697	3182.85	4	607149	813943	827053	753339	785991	999340
315	58224174			49067	1022.66	1.30209	3446.35	4	602175	807275	820278	747168	779552	991154
2486	58224508	Black Lake		48309.7	1021.12	1.31029	3178.47	4	592881	794816	807618	735637	767521	975857
4146	58224040	Helen Lake		42859	824.469	1.12321	3329.87	4	525987	705138	716495	652635	680922	865752
2466	58224676	Uintah Lake		42588.2	1114.18	1.52272	3336.13	4	522663	700682	711968	648511	676619	860281
435	58225002	Craig Lake		39697.4	833.391	1.17971	3308.23	4	487186	653121	663641	604491	630692	801887
1469	72130431	South Erickson Lake		36579.8	939.061	1.38478	3081.43	4	448926	601830	611523	557019	581162	738913
5432	82733747	Tail Lake		37317.2	951.502	1.38919	3047.48	4	457975	613961	623850	568247	592876	753807
3305	58224714			34929.4	717.683	1.08304	3493.17	4	428671	574676	583933	531888	554941	705574
1132	58227094			31924	948.434	1.49712	3286.43	4	391788	525230	533690	486123	507193	644865
4657	72130409	North Erickson Lake		31913.4	845.293	1.33453	3056.95	4	391657	525055	533512	485961	507024	644651
749	72130563	Lower Shingle Creek Lake		10968.9	795.714	2.14281	2934.85	4	134616	180466	183373	167029	174268	221572
3978	82733793			28977.3	645.725	1.06986	3093.46	4	355624	476750	484429	441253	460378	585342
2311	82733685			27704.9	677.099	1.14731	3031.91	4	340009	455816	463157	421877	440162	559640
4730	46858647	Teal Lake		25107.2	644.59	1.14734	3131.01	4	308128	413075	419729	382319	398890	507164
2505	58224924	Anderson Lake		24812.3	633.716	1.13467	3228.65	4	304509	408225	414800	377830	394206	501209
3251	58226980			24489.4	617.229	1.11241	3230.76	4	300546	402912	409402	372913	389076	494686
2386	58224488	Blythe Lake		24139.8	700.382	1.27138	3021.57	4	296256	397160	403557	367589	383521	487624
1003	58227652	Big Dog Lake		24298.1	617.854	1.11791	3078.72	4	298198	399764	406203	369999	386036	490822
5464	82733689	Lilly Lake		23606	591.935	1.0866	3022.98	4	289704	388377	394633	359460	375040	476840
5112	75276733	Bennion Lake		28973.3	842.918	1.39667	3339.33	4	355575	476683	484361	441191	460313	585261
5655	58226126	Three Lakes		27164.8	820.666	1.40434	3299.24	4	333380	446929	454127	413652	431580	548729
5290	72130439	West Shingle Creek Lake		21866	658.801	1.25654	3031.61	4	268351	359751	365546	332965	347397	441694
1479	72130197	Olsen Lake		21472.4	578.037	1.11256	3118.71	4	263520	353274	358964	326970	341142	433742
863	58226636	Sonny Lake		20601	598.896	1.17683	3191.35	4	252826	338939	344398	313702	327299	416141
3424	58224220	Bowden Lake		20015.3	535.226	1.067	3260.53	4	245638	329302	334606	304783	317993	404309
445	58223940	Wilderness Lake/U-37		18851.5	550.958	1.13176	3413.48	4	231355	310155	315150	287062	299504	380801
4716	82733519	Clegg Lake		18513.4	513.901	1.06523	3194.48	4	227205	304591	309497	281912	294131	373970
128	58224138	Butterfly Lake		18772.9	763.31	1.57124	3152.88	4	230390	308860	313835	285864	298254	379212
972	58224538	Ledge Lake		18134.3	564.919	1.18316	3313.46	4	222553	298354	303160	276140	288108	366312
909	58227322	Survey Lake		17608.5	613.695	1.30436	3263.34	4	216101	289704	294370	268134	279755	355692
2416	58224972	Wilder Lake		17276.6	525.73	1.12808	3017.88	4	212027	284243	288821	263079	274481	348987
1585	58224190	Bud Lake		15601.1	484.262	1.09348	3117.9	4	191464	256677	260811	237565	247862	315142
2468	46846095	Salamander Lake		14601.5	468.187	1.09277	3056.78	4	179197	240232	244101	222345	231982	294951
2312	82733699	Weir Reservoir		3776.26	274.639	1.26049	3047.28	4	46344.1	62128.9	63129.6	57503	59995.3	76280.4
5695	72137315	Upper Yellow Pine Lake		7729.05	425.273	1.36431	2959.73	4	94854.7	127162	129210	117694	122795	156127
37	82733765	Rock Lake		2927.38	205.859	1.0731	3143.96	4	35926.2	48162.7	48938.4	44576.6	46508.7	59133
4683	72140325	Peter Lake		9756.37	386.728	1.10425	3189.31	4	119735	160517	163102	148565	155004	197079
625	40035433	Lake Wilde		10981.4	579.7	1.5602	3420.23	4	134770	180672	183582	167220	174468	221825
1700	35219280	Lake Ejod		10638.4	443.256	1.21206	3328.1	4	130559	175028	177847	161996	169017	214895
118	46858657	Jewel Lake		9639.94	393.579	1.13058	3144.2	4	118306	158601	161156	146792	153155	194727
5634	58226936	Horseshoe Lake		12576.3	521.112	1.31057	3081.54	4	154343	206912	210245	191506	199806	254042
5085	75276737	GR-177		74809.1	1403.62	1.44737	3311.13	3.5	918094	1.2308e+06	1.25062e+06	1.13915e+06	1.18853e+06	1.51114e+06
3168	58226008	Governor Dern Lake		130579	1584.16	1.23643	3043.53	3	1.60253e+06	2.14835e+06	2.18295e+06	1.98839e+06	2.07457e+06	2.63769e+06
4863	58226282	Squaw Lake		43979.8	1001.31	1.34664	3202.73	3	539742	723578	735233	669703	698730	888393
4436	58224452			39444.6	869.18	1.23431	3371.53	3	484083	648962	659414	600642	626675	796780
1690	58226118	Sea Lion Lake		37644	1259.64	1.83108	3167.05	3	461986	619338	629314	573224	598069	760409
4075	58225218	Packard Lake		37086.6	760.178	1.11331	3044.53	3	455146	610168	619996	564737	589214	749150
5592	58224470	Margie Lake		33138.2	754.477	1.16893	3349.72	3	406689	545207	553989	504613	526484	669393
47	82733809	Beth Lake		33117.2	676.856	1.049	2983.7	3	406431	544861	553637	504293	526150	668968
1613	46846079	Hell Hole Lake		31364.5	855.369	1.3622	3153.31	3	384921	516025	524336	477603	498304	633563
3576	40035367	Deadman Lake		28535.9	720.374	1.20273	3347.57	3	350207	469487	477049	434531	453365	576426
113	58224662	Moosehorn Lake		29061.8	827.207	1.36855	3168.49	3	356661	478140	485841	442539	461720	587049
5147	58226910	Middle Rock Lake		27960.5	846.543	1.42785	3225.77	3	343145	460020	467430	425769	444222	564802
3040	72140299	Bench Lake		23920.8	719.674	1.31237	3132.78	3	293568	393557	399896	364254	380042	483201
3475	58226194	Cirque Lake		22805.9	793.198	1.48138	3248.37	3	279885	375214	381258	347277	362329	460679
1004	58227368			23197.2	578.535	1.07132	3140.02	3	284688	381653	387800	353236	368546	468584
1364	40036335	Ashley Twin Lakes		126246	2401.89	1.90656	3151.37	3	1.54936e+06	2.07707e+06	2.11052e+06	1.92242e+06	2.00574e+06	2.55017e+06
4563	40036145	Goose Lakes		85792.9	1414.7	1.36222	3126.46	3	1.05289e+06	1.41151e+06	1.43424e+06	1.30641e+06	1.36303e+06	1.73302e+06
3976	{22AA40D6-250E-4475-ABED-C1E60E53749B}	Wigwam Lake		62199.7	1057.56	1.19597	3238.53	3	763346	1.02334e+06	1.03982e+06	947147	988198	1.25643e+06
5031	75283695	GR-151		46044.2	1277.95	1.6797	3364.66	3	565078	757542	769744	701138	731527	930093
1832	75289001	Castle Lake		42762.8	1138.12	1.55225	3465.17	3	524807	703555	714888	651171	679394	863809
3172	58224782	Morat Lakes		19618.8	572.747	1.15328	3278.62	3	240771	322778	327977	298745	311693	396299
781	82733495	Watson Lake		17195.3	679.641	1.46178	3179.71	3	211029	282906	287462	261841	273190	347345
140	58224650	Scudder Lake		16193.2	473.446	1.04933	3067.65	3	198731	266419	270710	246582	257270	327103
1484	72130187	Adax Lake		15668.4	488.511	1.1007	2961.87	3	192290	257784	261936	238590	248931	316501
2467	46846113	Toomset Lake		7544.58	335.258	1.0886	3143.65	3	92590.9	124127	126127	114885	119865	152401
3033	72140315	Lovenia Lake		9046.13	380.723	1.12898	3146.08	3	111019	148832	151229	137750	143720	182732
246	58227432	Lily Pad Lake		4880.31	285.299	1.15182	3127.64	3	59893.6	80293.2	81586.5	74314.9	77535.9	98582.2
2327	82733459	John Lake		11782.3	425.54	1.10569	3203.31	3	144599	193849	196971	179416	187192	238003
918	58224884	Hyatt Lake		10716.7	517.788	1.41068	3281.33	3	131521	176317	179157	163189	170262	216478
3073	72140125	Cutthroat Lake		11789.4	435.341	1.13082	3171.38	3	144685	193964	197089	179523	187303	238145
1694	58224240	Bench Lake		7349.73	331.684	1.09118	3340.26	3	90199.6	120922	122869	111918	116769	148465
1216	58225232	Cleveland Lake		88678.6	1497.26	1.41807	3238.53	2	1.08831e+06	1.45898e+06	1.48248e+06	1.35035e+06	1.40888e+06	1.79131e+06
201	46845963	Scow Lake		87572.5	1190.76	1.13488	3083.09	2	1.07473e+06	1.44079e+06	1.46399e+06	1.33351e+06	1.39131e+06	1.76896e+06
3400	58225600	B-29 Lake		73750.5	1392.5	1.44617	3274.53	2	905103	1.21338e+06	1.23292e+06	1.12304e+06	1.17171e+06	1.48976e+06
487	58224168			72956.2	1182.53	1.23478	3303.33	2	895355	1.20031e+06	1.21964e+06	1.11094e+06	1.15909e+06	1.47371e+06
5148	58226098	Rasmussen Lakes		66137.5	1069.72	1.17316	3193.57	2	811672	1.08813e+06	1.10565e+06	1.00711e+06	1.05076e+06	1.33598e+06
5028	58225074			62101.6	1418.81	1.60576	3481.43	2	762142	1.02173e+06	1.03818e+06	945652	986639	1.25445e+06
521	58226158			60616.8	1178.89	1.35046	3187.77	2	743919	997298	1.01336e+06	923042	963049	1.22446e+06
4415	58224460	Brook Lake		53726.2	1062.27	1.29256	3334.93	2	659355	883931	898168	818116	853575	1.08527e+06
2447	58227376	Arta Lake		50588.2	1139.6	1.42901	3193.53	2	620844	832303	845708	770332	803720	1.02188e+06
1891	58224744			45347	923.898	1.22365	3477.06	2	556521	746071	758088	690521	720450	916009
4110	58224552	Shaler Lake		43412.4	815.426	1.10379	3328.44	2	532779	714243	725747	661063	689715	876931
5606	58224438	Rosalie Lake		40360.2	776.503	1.09012	3325.61	2	495321	664027	674722	614585	641223	815277
4883	58225288	Lower Ottoson Lake		34586.9	940.13	1.42574	3378.77	2	424468	569041	578207	526672	549500	698656
2645	58225940			33674.6	809.738	1.24452	3371.93	2	413271	554031	562955	512780	535005	680226
5581	58224904	Evermann Lake		32563.4	1014.21	1.58516	3208.14	2	399634	535749	544378	495859	517351	657780
5430	82733875	Buckeye Lake		32833.9	751.453	1.16963	2951.58	2	402954	540200	548901	499978	521649	663245
3205	58224244	Gladys Lake		32063.7	860.617	1.35554	3324.33	2	393502	527529	536025	488250	509413	647687
5744	35210380			29446.7	697.137	1.1458	3238.27	2	361385	484472	492275	448400	467835	594824
3988	82733637	Crystal Lake		29143.7	722.627	1.19385	3057.76	2	357665	479486	487209	443785	463020	588702
5014	58225790	Lower Carroll Lake		27659.5	685.33	1.16221	3372.63	2	339451	455068	462398	421185	439440	558722
827	72140303	Pass Lake		27941.7	967.208	1.63193	3073.68	2	342915	459711	467116	425483	443924	564423
42	72140321	Hidden Lake		27324.4	771.712	1.3167	3130.62	2	335339	449555	456796	416083	434117	551954
5255	40036391			27221.6	1294.05	2.21209	3138.93	2	334077	447863	455077	414517	432483	549876
1133	58227298			27213.9	709.72	1.21339	3213.43	2	333983	447737	454949	414400	432361	549721
1940	58223948	Davis Lakes		25344.5	641.886	1.13717	3358.97	2	311040	416980	423696	385933	402660	511958
5134	58225864			25047.8	873.857	1.55727	3237.97	2	307399	412098	418736	381415	397946	505965
2777	75273337			24679.6	733.935	1.31764	3213.33	2	302881	406041	412581	375809	392097	498528
3548	75294767			23512	609.043	1.12024	3286.47	2	288551	386831	393062	358029	373547	474942
4527	40035847	Red Belly Lake		23155.3	749.067	1.38836	3214.86	2	284174	380963	387099	352598	367880	467737
4400	58223984	Samuels Lake		23343.9	579.132	1.06905	3347.93	2	286488	384066	390252	355470	370877	471548
1343	75294493			19414.3	642.071	1.29966	2828.08	2	238262	319414	324559	295632	308445	392169
1045	58225392			22166.8	658.162	1.24678	3379.57	2	272043	364700	370574	337546	352176	447770
488	58224254	Dime/Dollar Lake		41932.8	897.07	1.23554	3264.33	2	514620	689900	701012	638532	666208	847043
6067	75273305	Summit		37039.7	1003.83	1.47107	3189.53	2	454569	609395	619211	564022	588468	748201
2663	58226840	Albert		32783.3	966.323	1.50523	3301.63	2	402333	539367	548055	499208	520845	662223
4882	58225866	Cleveland Lake		26821.6	873.856	1.50489	3408	2	329169	441283	448391	408427	426129	541797
4042	58224336	Bonnie Lake		17514.9	516.744	1.10123	3084.64	2	214951	288163	292805	266708	278268	353800
5237	40035519	Moap Lake		14064.7	578.475	1.37571	3276.86	2	172609	231400	235127	214171	223453	284108
4745	46858685	Hayden Lake		14449.8	698.525	1.63892	3180.14	2	177336	237736	241565	220035	229572	291887
1968	58225976	Meadow Lake		14152.4	486.441	1.15325	3275.93	2	173685	232842	236592	215505	224846	285878
2326	82733831	Trident Lake		11543.1	473.555	1.24313	2970.91	2	141663	189913	192972	175773	183391	233171
1505	82733471	South Twin Lake		8430.8	354.071	1.08759	3174.86	2	103467	138708	140942	128380	133944	170302
77	72140359	Reids Lake		7247.74	421.059	1.39492	3130.82	2	88947.9	119243	121164	110365	115148	146404
4144	58224332	Ouray Lake		3130.6	224.391	1.1311	3168.4	2	38420.3	51506.3	52335.9	47671.3	49737.5	63238.2
4267	72137319	Lower Yellow Pine Lake		3755.04	232.215	1.06879	2935.48	2	46083.7	61779.8	62774.9	57179.9	59658.2	75851.8
5171	75273245	Lost Lake		13198.7	529.009	1.29869	3144.28	2	161981	217152	220650	200984	209695	266614
4693	120030835	James Lake		5189.42	264.394	1.03514	3204.25	2	63687.1	85378.9	86754.1	79021.9	82446.9	104826
5452	82733481	Hope Lake		5843.61	372.184	1.37317	3152.08	2	71715.7	96142	97690.6	88983.6	92840.4	118041
3224	58224278	Doug Lake		9199.63	435.743	1.28131	3373.77	2	112902	151357	153795	140087	146159	185832
540	58227512	Davis Park		662.869	98.748	1.08174	3043.26	2	8135.06	10905.9	11081.5	10093.8	10531.3	13390
2377	46878309	Bourbon Lake		7834.36	345.933	1.10229	2995.48	2	96147.2	128895	130971	119298	124468	158254
950	46845981	Baker Lake		10726.7	460.849	1.25497	3179.91	2	131643	176481	179323	163340	170420	216679
4371	58224024	Kidney Lakes		87593	1317.11	1.25515	3310.63	1	1.07499e+06	1.44112e+06	1.46434e+06	1.33382e+06	1.39163e+06	1.76938e+06
3536	58225576	Sand Lake		50922.8	1341.8	1.67702	3176.57	1	624950	837807	851302	775427	809036	1.02864e+06
5769	75288985	Grass Lake		41661.9	1109.02	1.53241	3298.77	1	511296	685443	696483	634407	661904	841571
4843	46867131	Norice Lake		29704.9	826.434	1.35239	3191.97	1	364553	488719	496591	452331	471936	600039
2050	58225702	Saucer Lake		22988.6	599.966	1.11603	3201.97	1	282128	378220	384312	350059	365231	464370
6060	58224902	Sharlee		37420.2	866.662	1.26359	3274.23	1	459239	615656	625572	569816	594513	755888
3987	82733567	Petit Lake		30836.6	803.772	1.29094	3119.6	1	378442	507338	515510	469564	489916	622898
1360	40035831	Hopper Lakes		22251.7	739.56	1.3983	3143.6	1	273083	366095	371992	338837	353523	449484
2161	40036063	Hopper Lakes		20883	638.513	1.24618	3203.74	1	256287	343578	349112	317996	331779	421837
2510	58227064	Mid Lake		19258.8	590.449	1.19999	3179.56	1	236353	316855	321958	293263	305974	389027
782	82733541	Petit Lake		5321.72	306.26	1.18406	3142.95	1	65310.8	87555.6	88965.8	81036.5	84548.8	107499
2602	58228646			169298	1640.84	1.12473	2321.69	0	2.07771e+06	2.78538e+06	2.83024e+06	2.57799e+06	2.68973e+06	3.41983e+06
6083	58225356	Whiterocks Lake		118849	2018.88	1.65166	3218.87	0	1.45857e+06	1.95536e+06	1.98685e+06	1.80977e+06	1.88821e+06	2.40074e+06
2767	58227252	Pole Creek Lake		118147	1757.74	1.44229	3095.67	0	1.44996e+06	1.94382e+06	1.97513e+06	1.79909e+06	1.87707e+06	2.38658e+06
4452	75294411	Spirit Lake		91481.1	1398.51	1.30409	3100.27	0	1.1227e+06	1.50509e+06	1.52933e+06	1.39303e+06	1.45341e+06	1.84792e+06
6269	82734605	Mill Hollow Reservoir		77053.3	1348.51	1.37014	2696.86	0	945637	1.26772e+06	1.28814e+06	1.17333e+06	1.22418e+06	1.55648e+06
359	58228704			67221.3	1077.66	1.17229	2321.69	0	824973	1.10596e+06	1.12377e+06	1.02361e+06	1.06798e+06	1.35787e+06
3300	58225694	Drift Lake		58958.2	1212.5	1.40837	3373.97	0	723564	970009	985633	897786	936698	1.19096e+06
2661	58227622	DG-1		59079.6	939.298	1.08991	3066.12	0	725055	972007	987663	899635	938627	1.19341e+06
1019	58228566			59111.2	1585.26	1.83897	2214.22	0	725442	972527	988191	900116	939129	1.19405e+06
398	58225008	U-22		57466.8	1297.36	1.52637	3482.53	0	705261	945472	960700	875075	913003	1.16083e+06
1117	58223912	U-82		56646.3	967.224	1.14617	3494.46	0	695191	931973	946984	862581	899968	1.14425e+06
5119	58225450	U-98		46550.2	961.617	1.25704	3264.07	0	571287	765867	778203	708843	739566	940314
492	75276749			46559.4	844.992	1.10448	3323.23	0	571400	766018	778356	708983	739712	940499
2336	82733783	Shallow Lake		45057.6	829.991	1.1028	2994.18	0	552970	741311	753251	686115	715853	910164
6199	40036061			39501	735.389	1.04357	2955.04	0	484776	649890	660357	601501	627572	797920
4604	40036657			38588.8	1701.55	2.443	2939.12	0	473581	634883	645109	587611	613080	779494
1140	58223910			38580.8	827.675	1.18845	3427.46	0	473483	634751	644975	587490	612953	779333
1998	75273285			38863	883.857	1.26451	3213.23	0	476946	639393	649692	591786	617436	785032
977	58224390	X-120		37806.4	963.658	1.39781	3329.85	0	463979	622009	632028	575696	600649	763688
6012	58224394	U-58		37986.5	840.635	1.21647	3299.23	0	466189	624973	635039	578439	603510	767327
2717	58224448			37907.7	1268.88	1.83807	3255.12	0	465222	623677	633722	577240	602259	765736
1847	58224664	Y-23		36898.2	729.653	1.07133	3588.67	0	452833	607068	616846	561867	586220	745344
1724	58226254	X-83		36035.2	863.043	1.28226	3259.04	0	442242	592869	602418	548726	572509	727911
4290	58224132			35046.2	908.374	1.36852	3484.87	0	430104	576597	585885	533666	556796	707933
6158	40035489			33597.8	711.863	1.09534	3286.15	0	412329	552768	561671	511610	533785	678675
3819	75277199	Quarter Corner		33285.3	808.165	1.24934	2718.32	0	408494	547626	556447	506852	528820	672363
689	40036197	Lily Pad Lake (Ashley Creek)		32129	709.461	1.11632	2939.24	0	394303	528602	537117	489244	510450	649006
5582	58224486	Faxon Lake		32195.7	954.7	1.50064	3350.64	0	395122	529700	538232	490261	511510	650354
1514	58227300			32104.2	729.363	1.14808	2970.44	0	393998	528194	536702	488866	510055	648504
3545	75294255			31728	1074.81	1.70185	2957.47	0	389381	522004	530412	483138	504078	640905
6313	35180562			30646.9	971.54	1.56522	2830.86	0	376115	504219	512340	466676	486903	619068
5211	40036091			31135.6	796.382	1.27292	3228.96	0	382111	512258	520509	474117	494666	628939
2678	58223920			31003.9	728.556	1.16698	3458.09	0	380495	510091	518307	472111	492574	626278
4147	58226692	Francis Lake		31371.6	731.122	1.1642	3034.7	0	385009	516142	524456	477712	498417	633707
6089	75294631			31048.4	661.658	1.05906	3250.17	0	381042	510825	519052	472790	493282	627179
3029	82733763	Shoestring Lake		30577.8	932.612	1.5042	2995.6	0	375265	503081	511184	465623	485804	617671
5212	40036053	Kibah Lakes		30266.8	759.729	1.23164	3215.76	0	371449	497965	505985	460888	480864	611390
4468	75294611			29516.5	644.745	1.05843	3298.47	0	362241	485620	493442	449462	468943	596233
3053	72140377			29422.8	995.304	1.63652	3153.6	0	361092	484079	491876	448036	467455	594341
386	58224442			28791.8	684.179	1.13722	3751.46	0	353347	473697	481327	438427	457430	581594
1836	58224708	Kings Lake		29474	798.871	1.3124	3481.37	0	361719	484921	492731	448815	468268	595374
997	35205162			28126.6	858.033	1.44296	2854.22	0	345183	462752	470206	428297	446861	568156
1407	40036059			27128.1	723.764	1.23935	2948.37	0	332929	446325	453514	413093	430998	547987
4328	58223918			27376.8	680.277	1.15959	3662.36	0	335981	450416	457671	416880	434948	553011
4209	58226288	East Slide Lake		26884.8	734.719	1.26379	3145.34	0	329943	442321	449446	409388	427132	543072
1079	35210306			26330.6	786.719	1.3674	3206.87	0	323143	433205	440182	400950	418328	531879
3406	58224936			26022.4	676.729	1.18317	3346.86	0	319360	428134	435030	396256	413431	525653
5974	35204868			25376.9	689.924	1.22149	2766.82	0	311438	417513	424238	386427	403175	512613
987	58224020			25321.9	632.574	1.12117	3447.66	0	310763	416608	423319	385589	402302	511502
508	58226040			24671.2	743.986	1.33591	3335.07	0	302778	405903	412441	375681	391964	498359
5818	58226422			24987.7	812.399	1.44949	3323.63	0	306661	411110	417731	380500	396992	504751
1473	82733797			24658.7	1442.03	2.58999	2903.24	0	302623	405697	412231	375490	391764	498105
249	35188498			23984.9	654.845	1.19255	3011.36	0	294355	394612	400968	365231	381061	484496
5035	58226324			23565.3	596.036	1.09508	3603.53	0	289205	387708	393952	358840	374393	476018
2501	58226348			23778.6	620.944	1.13571	3158.75	0	291823	391217	397519	362089	377783	480328
6320	35180564			23787.8	684.831	1.25232	2779.35	0	291936	391369	397672	362229	377929	480513
2307	72130205			23003.8	838.86	1.5599	3094.5	0	282315	378471	384567	350291	365474	464678
6064	58226530			22986.6	817.546	1.52084	2991.47	0	282103	378187	384279	350029	365200	464330
2539	58224158			23147.8	614.901	1.13988	3532.85	0	284081	380839	386973	352483	367761	467585
379	58225262			23091	599.774	1.1132	3381.27	0	283384	379905	386024	351618	366858	466438
2668	58227620			22675.8	645.632	1.20924	3127.58	0	278288	373073	379082	345295	360261	458051
4437	75273323			22636.7	641.268	1.2021	3262.33	0	277809	372431	378430	344701	359641	457262
449	75276743			22621.2	791.337	1.48392	3359.93	0	277618	372175	378170	344464	359394	456948
1185	75280189			22604	691.247	1.29673	2826.08	0	277408	371892	377882	344202	359121	456601
3747	72130189			17902	691.742	1.45814	3071.87	0	219703	294533	299277	272603	284419	361621
4928	35205228			22637.2	895.643	1.67893	2788.1	0	277815	372438	378437	344707	359648	457271
1771	35210406			21586.6	580.603	1.11454	3409.98	0	264921	355153	360873	328709	342956	436048
2594	35210550			22101.7	587.442	1.11445	3387.66	0	271243	363628	369485	336554	351141	446454
2909	40036007			22019.6	921.041	1.75058	2949.19	0	270236	362277	368113	335303	349836	444796
3436	58224052			21889.2	588.68	1.1222	3330.13	0	268636	360133	365933	333319	347765	442163
2686	58224144			22051.1	617.071	1.172	3285.53	0	270622	362796	368640	335783	350337	445433
3333	58224250			21808.6	884.637	1.6895	3561.57	0	267646	358806	364585	332090	346484	440533
116	58224256			22290.2	720.471	1.36103	3119.44	0	273557	366730	372637	339425	354136	450263
5107	58224326			21920.8	675.604	1.28698	3299.23	0	269023	360652	366461	333799	348267	442800
5717	58224882			21684.9	665.548	1.2747	3312.64	0	266128	356771	362518	330207	344519	438036
2493	58226496	Slide Lake		21672	614.267	1.17684	3109.05	0	265969	356558	362301	330010	344314	437774
5004	58226974			21837.5	911.55	1.73975	3175.87	0	268001	359282	365069	332531	346943	441118
420	75277331			21533.2	614.468	1.18101	2981.49	0	264266	354275	359981	327897	342109	434971
1422	40036999			21345.3	1115.25	2.15292	2949.49	0	261960	351183	356839	325035	339123	431174
3392	58227310			20504.9	551.633	1.0865	3213.43	0	251647	337357	342791	312239	325772	414200
4429	75273313			20854.5	594.707	1.16148	3164.33	0	255937	343109	348636	317562	331326	421261
4509	75294681			20926.8	577.877	1.12666	3213.37	0	256825	344299	349844	318663	332475	422722
5434	82733615	Ponds Lake		21324.1	723.403	1.39718	3058.52	0	261701	350836	356486	324713	338787	430748
1092	75294487			20982.5	610.3	1.18829	3285.07	0	257507	345214	350774	319511	333359	423846
3881	35180664			19736.8	661.263	1.32753	2815.87	0	242220	324719	329950	300542	313568	398683
2926	40036549			20107.6	1031.24	2.05111	2951.52	0	246770	330819	336148	306188	319459	406173
3146	46852561			19961.4	612.82	1.22333	3241.58	0	244977	328416	333706	303963	317138	403221
430	58223906			19717.5	592.321	1.1897	3492.96	0	241983	324402	329627	300248	313261	398293
2553	58225768			19594.4	596.908	1.20268	3191.63	0	240472	322377	327570	298374	311306	395807
4013	58226722			19493.3	632.76	1.27822	2984.6	0	239232	320714	325880	296835	309700	393765
4183	58227426			20442.8	638.414	1.25933	3128.32	0	250884	336335	341752	311292	324785	412944
2287	72150677			19841.7	568.384	1.13805	2680.01	0	243508	326446	331704	302140	315235	400803
1963	75276739			20092.5	520.017	1.03469	3396.13	0	246585	330572	335896	305958	319219	405868
4342	75276943			19783.2	1150.95	2.3079	2984.7	0	242789	325483	330725	301248	314305	399620
5903	75277129			19970.7	820.023	1.63658	2766.71	0	245090	328567	333860	304103	317284	403408
5869	75279975			19941	613.452	1.22522	2853.26	0	244725	328079	333363	303651	316812	402807
1203	75280351			19478.8	595.257	1.20291	3134.84	0	239054	320475	325637	296613	309469	393472
387	75288935			19293.7	567.102	1.15149	3422.74	0	236782	317430	322542	293795	306529	389733
1094	35181050			19348	799.436	1.62097	2949.06	0	237448	318322	323450	294621	307391	390829
6296	35182286			19008.9	657.72	1.34546	2675.73	0	233286	312744	317781	289458	302004	383979
4481	40036137			18498.6	1031.53	2.13906	3205.55	0	227024	304348	309250	281687	293896	373671
4973	58224162			18495.8	747.112	1.54938	3585.87	0	226990	304302	309203	281645	293852	373615
323	58225622			18571.2	587.573	1.21604	3362.27	0	227915	305543	310464	282793	295050	375138
384	58226938			19480.9	722.053	1.45906	3178.37	0	239079	320509	325671	296645	309502	393514
4997	75294523			19337	738.522	1.49788	3276.77	0	237313	318142	323266	294454	307216	390607
5713	35209540			18111.4	621.671	1.30284	3325.45	0	222272	297977	302777	275791	287744	365850
301	35209592			17502	526.344	1.12211	3387.85	0	214793	287951	292589	266511	278063	353540
233	58224786	Fall Lakes		18005	775.353	1.62971	3272.42	0	220966	296227	300998	274171	286054	363700
1727	58225176			17495	629.037	1.3413	3387.7	0	214707	287837	292473	266405	277952	353399
1767	58225512			18389.4	668.653	1.39067	3402.37	0	225684	302552	307425	280025	292162	371466
1725	58226022			17699.4	649.883	1.37773	3313.2	0	217216	291199	295889	269517	281199	357527
2026	75273297			17710.8	524.366	1.11128	3299.63	0	217355	291386	296080	269691	281380	357758
569	75294759			17825.9	540.552	1.14188	3374.49	0	218769	293281	298005	271445	283210	360084
4524	75294787			17979.3	514.946	1.08314	3157.47	0	220651	295805	300569	273780	285646	363182
5099	75280209			17735.7	613.215	1.29866	2845.3	0	217661	291796	296496	270070	281775	358260
555	75298877			17712.2	691.591	1.46562	3029.87	0	217373	291410	296103	269712	281402	357786
1956	75280143			16817.8	480.198	1.04434	2813.39	0	206397	276695	281152	256093	267193	339720
2187	40035685			17464.3	500.025	1.06715	3017.23	0	214330	287331	291959	265937	277463	352778
4593	40037081			16779.9	586.405	1.27677	2947.36	0	205931	276071	280518	255516	266590	338953
4755	46845767			16757.4	742.128	1.6169	2777.97	0	205656	275702	280142	255174	266234	338500
143	46848701			17152.8	793.861	1.70956	2717.26	0	210508	282206	286752	261194	272515	346486
5037	58223934			17009.4	584.395	1.26378	3421.16	0	208748	279847	284354	259010	270236	343589
2679	58223936			17385.2	546.68	1.16937	3409.93	0	213360	286030	290637	264733	276208	351181
5016	58224338			16506.1	464.273	1.0192	3492.96	0	202571	271567	275941	251347	262241	333424
6037	58224944			16732.6	467.489	1.01929	3309.36	0	205351	275293	279727	254796	265839	337999
2365	58225406	Blizzard Lake		16698.1	765.194	1.67011	3143.49	0	204927	274725	279150	254270	265290	337301
5629	58225612			16564.4	529.063	1.15938	3227.52	0	203287	272526	276916	252235	263168	334602
3315	58226630			17254.3	550.238	1.18143	3265.07	0	211754	283877	288449	262740	274128	348537
4938	58226744			16697.6	787.019	1.71777	3205.44	0	204921	274717	279142	254262	265283	337291
1124	58226976			17024.3	735.387	1.5896	3339.33	0	208931	280093	284604	259238	270474	343892
3260	58226996			17238.1	509.427	1.09432	3191.41	0	211555	283610	288178	262493	273870	348210
3417	58227732			17139.5	958.096	2.06404	2953.56	0	210344	281987	286529	260991	272303	346217
4546	75294259	Stove Lake		17422.3	553.31	1.18229	2833.3	0	213815	286640	291257	265298	276796	351930
2058	75298855			16784.7	1016.94	2.21383	2945.37	0	205990	276151	280599	255589	266667	339051
5740	35210460			16406.1	511.373	1.12601	3242.66	0	201344	269921	274268	249823	260651	331403
4857	35219210			16428.7	618.852	1.36174	3251.89	0	201621	270293	274647	250168	261011	331860
1345	40035461			16277.9	599.064	1.32429	3340.7	0	199770	267811	272125	247871	258614	328813
5213	40035833			15922.6	687.513	1.53667	3274.96	0	195410	261966	266186	242461	252970	321636
4753	46845909			15962.8	588.85	1.31449	2790.72	0	195904	262629	266859	243074	253610	322449
5534	46852469			15875.8	547.545	1.22563	3204.87	0	194836	261197	265404	241749	252227	320691
3094	46878295			16042.5	588.97	1.31149	2922.41	0	196882	263939	268190	244287	254875	324058
4961	58224536			15924.2	657.352	1.46919	3471.77	0	195429	261992	266212	242485	252995	321668
6030	58224886			15908.6	514.468	1.1504	3371.03	0	195238	261736	265951	242248	252747	321353
1571	58225296			15674.4	456.734	1.02891	3129.51	0	192364	257883	262036	238682	249027	316622
5591	58225444	Olga Lake		15627.1	518.193	1.16912	3232.33	0	191784	257105	261247	237962	248276	315668
3141	58225528			16277.1	545.891	1.20677	3034.61	0	199761	267799	272112	247859	258602	328797
370	58225842			16036.7	552.843	1.23127	3284.67	0	196810	263843	268093	244198	254783	323941
4306	58226192			15901.7	552.554	1.23584	3327.67	0	195153	261622	265836	242143	252638	321214
4977	58226560			15932.3	540.855	1.20851	3112.07	0	195529	262126	266348	242609	253124	321832
5650	58226760			16450.7	578.069	1.27115	3241.75	0	201891	270654	275014	250502	261360	332303
4726	58226916			16047.5	564.581	1.25699	2935.34	0	196943	264022	268274	244363	254955	324160
4917	58226948			16043.8	492.701	1.09708	3182.84	0	196897	263960	268212	244306	254895	324084
330	58226990			15899.2	755.157	1.68911	3264.87	0	195123	261582	265795	242105	252599	321164
4170	58227412			16263	515.746	1.14063	3143.28	0	199588	267567	271877	247645	258378	328513
4198	58227424			16043.7	585.573	1.30388	3104.67	0	196896	263958	268210	244305	254894	324082
2295	72130567			16449	494.482	1.0874	3021.07	0	201871	270628	274987	250478	261334	332271
545	75273303			16197.8	539.831	1.19629	3181	0	198788	266495	270787	246652	257343	327196
2156	75294527			15607.3	496.085	1.11995	2850.08	0	191541	256780	260916	237661	247962	315268
375	75294655			15635.2	483.565	1.09071	3408.69	0	191883	257237	261381	238084	248404	315830
50	120030837			15552.4	510.528	1.15459	3188.96	0	190867	255876	259997	236824	247088	314158
753	72130165			5520.25	375.29	1.42461	3042.28	0	67747.3	90821.9	92284.8	84059.6	87702.9	111509
1715	58227752			15314.9	502.871	1.14606	3007.72	0	187952	251969	256027	233208	243316	309361
3808	35180820			14529.3	631.88	1.47849	2809.63	0	178311	239044	242894	221245	230835	293492
3911	35180860			14506.4	469.521	1.09947	2875.11	0	178030	238667	242511	220897	230471	293030
1104	35180974			15113.1	785.887	1.80298	2973.47	0	185475	248648	252653	230134	240109	305284
1035	35209538			15103.4	540.305	1.23997	3220.55	0	185356	248488	252491	229987	239955	305088
3281	35209566			14834	497.849	1.15286	3485.64	0	182050	244056	247987	225884	235675	299646
300	35209664			15269.9	590.412	1.34755	3491.85	0	187400	251228	255275	232522	242601	308452
2170	40036195			15463.7	636.015	1.44251	3129.92	0	189778	254417	258514	235474	245680	312367
6211	40036879			15232.8	728.327	1.66434	2958.14	0	186945	250618	254655	231958	242012	307704
1681	46845775			15231.1	570.216	1.30311	2701.49	0	186924	250590	254626	231932	241984	307668
431	58223900			14848.8	756.131	1.75008	3482.16	0	182232	244300	248235	226111	235911	299946
1691	58224374			15358.3	654.218	1.48888	3191.74	0	188485	252683	256752	233869	244005	310238
5169	58224596			15452.1	647.242	1.46852	3250.92	0	189636	254226	258320	235297	245495	312132
5731	58224738			14806.8	506.014	1.17284	3439.57	0	181716	243608	247532	225470	235243	299097
4979	58224912			14966.7	588.84	1.35751	3408.17	0	183679	246240	250206	227905	237783	302327
1865	58224922			15353.5	697.58	1.58781	3457.38	0	188425	252603	256671	233795	243928	310140
4403	58225322			14792.2	503.817	1.16833	3275.23	0	181537	243368	247288	225248	235011	298802
5528	58225640			14848	520.967	1.20582	3083.73	0	182223	244287	248222	226099	235898	299930
866	58225652			14739	484.576	1.12573	3066.93	0	180884	242493	246399	224438	234165	297727
4364	58225770			15366.8	553.061	1.25831	3117.23	0	188589	252822	256894	233998	244140	310409
1897	58226318	Krebs Lake		15257.7	707.605	1.61567	3287.53	0	187250	251028	255071	232337	242407	308206
5779	58226542			15040.2	471.349	1.08398	3263.27	0	184581	247449	251435	229025	238951	303812
1621	58226716			14703.1	516.044	1.2003	3142.83	0	180444	241903	245799	223891	233595	297002
5809	58227304			15472.5	629.545	1.42743	3213.74	0	189887	254562	258662	235608	245820	312545
5792	58228318			15089.8	780.434	1.79185	2350.6	0	185189	248265	252264	229780	239739	304814
4181	58228370			14508	575.583	1.34776	2240.22	0	178049	238692	242537	220920	230495	293061
5295	72150633			15002.6	707.31	1.62867	2656.24	0	184119	246830	250806	228452	238353	303052
1249	75273329			14884.9	514.625	1.18967	3274.43	0	182675	244894	248839	226660	236484	300676
1118	75283691			14536.3	470.996	1.10179	3442.76	0	178397	239158	243010	221351	230945	293633
4535	75294439			15144.8	672.501	1.54124	2884.07	0	185864	249169	253183	230617	240612	305924
6136	75294791			15380	490.253	1.11494	3202.84	0	188751	253040	257115	234199	244350	310676
5478	72140143			14340.6	495.909	1.16796	3116.98	0	175995	235939	239739	218371	227836	289680
5887	35180662			14368	790.274	1.85946	2877.1	0	176332	236390	240198	218789	228272	290234
4998	35181072			14470.3	464.45	1.08895	2876.96	0	177586	238072	241907	220346	229896	292299
3326	35181180			14109.5	653.056	1.55061	3194.98	0	173159	232137	235876	214853	224165	285012
3325	35210338			13672.8	440.612	1.06276	3244.07	0	167799	224951	228574	208202	217226	276190
2075	40035401			13972.4	561.803	1.34047	3288.31	0	171476	229880	233583	212764	221986	282242
2910	40035793			13936.1	845.086	2.01901	2970.5	0	171030	229283	232976	212212	221409	281509
649	40037217			13782.5	469.343	1.12755	3117.84	0	169145	226756	230408	209872	218969	278406
3210	46846045			13846.5	449.884	1.0783	3324.89	0	169931	227809	231478	210847	219986	279698
1921	58223950			14318.5	468.997	1.10542	3389.27	0	175724	235575	239370	218035	227485	289234
2507	58224510			13872.2	451.534	1.08125	3327.84	0	170247	228233	231909	211239	220395	280219
4874	58224626			14153.9	605.83	1.43622	3361.4	0	173704	232868	236618	215529	224871	285910
3220	58224838			14025.1	507.865	1.20949	3189.26	0	172123	230747	234464	213567	222823	283306
1144	120026720	Yellow Lake		27.8418	41.7311	2.23058	2974.98	0	341.689	458.068	465.446	423.962	442.337	562.405
490	58226048	Wild Goose Lake		9769.94	427.104	1.2187	3251.34	0	119902	160740	163329	148772	155220	197353
1042	58226712	West Park		4618.51	277.727	1.15259	3241.64	0	56680.7	75986.1	77210	70328.4	73376.6	93294
1923	58223928	Weeping Ledge Lake		10550.3	437.37	1.20095	3424.11	0	129479	173579	176375	160655	167618	213116
5571	58224630	Walcott Lake		8856.22	433.877	1.30032	3351.95	0	108688	145707	148054	134858	140703	178896
4801	58224978	Verrill Lake		5812.04	283.662	1.04941	3201.46	0	71328.3	95622.6	97162.8	88502.9	92338.8	117403
229	58224180	Triangle Lake		12756.8	473.495	1.18237	3375.4	0	156557	209881	213261	194254	202673	257687
3372	58225800	Timothy Lakes		1764.43	186.525	1.2524	3390.22	0	21653.9	29029.2	29496.8	26867.8	28032.3	35641.4
49	120030836	Three Divide Lakes		9510.1	395.937	1.1451	3190.44	0	116713	156465	158985	144815	151092	192104
860	58227610	Splash Dam Lake		10413.9	475.007	1.31281	2792.83	0	127805	171335	174095	158578	165451	210361
3154	72135243	Shingle Mill Lake		7200	347.859	1.15623	2912.05	0	88362	118458	120366	109638	114390	145440
873	58224496	Shale Lake		4962.54	289.455	1.15887	3227.81	0	60902.8	81646.2	82961.3	75567.1	78842.4	100243
2451	58226190	Range Lake		11268.1	397.793	1.05691	3034.5	0	138288	185389	188375	171586	179023	227617
5497	46858673	Naomi Lake		10156.2	452.362	1.26599	3167.54	0	124641	167094	169786	154653	161356	205154
558	58226444	Mytoge Lake		7808.28	368.274	1.17544	3231.05	0	95827.1	128466	130535	118901	124054	157727
285	58227248	Mud Lake		8317.81	377.653	1.16787	3133.52	0	102080	136849	139053	126659	132149	168020
115	58224432	Mirror Lake		302.005	66.3012	1.07602	3072.52	0	3706.36	4968.74	5048.77	4598.78	4798.1	6100.5
5253	40037283	Mill Pond		12313.8	424.125	1.07797	3066.78	0	151122	202594	205857	187509	195636	248740
1367	40036245	Lower Goose Lake		642.592	98.4626	1.0955	3125.48	0	7886.22	10572.3	10742.5	9785.08	10209.2	12980.4
5436	82733527	Linear Lake		1990.7	253.793	1.60429	3157.13	0	24430.9	32752	33279.5	30313.4	31627.3	40212.2
4450	75273259	Lily Pad Lake		12672.6	412.092	1.03245	3166.93	0	155524	208495	211854	192971	201335	255986
4692	82733619	Lily Lakes		12390.4	471.372	1.19434	3056.45	0	152062	203854	207137	188675	196853	250287
4508	40035409	Lightning Park		3173.25	234.719	1.17518	3285.45	0	38943.7	52207.9	53048.8	48320.7	50415	64099.7
923	58226890	LaMarla Lake		10074.8	386.982	1.08738	3031.94	0	123643	165756	168426	153415	160064	203512
1516	82733585	Lake Marion		4287.5	270.272	1.16414	3015.7	0	52618.3	70540.1	71676.3	65287.9	68117.6	86607.5
4846	58224364	Jodie Lake		10851.9	453.482	1.22776	3338.92	0	133180	178541	181417	165248	172410	219209
4811	58226226	Jeff Lake		14288.1	473.364	1.1169	3044.33	0	175351	235075	238861	217572	227002	288619
2675	58226552	Island Lake		12182.5	511.575	1.30722	3189.73	0	149509	200432	203661	185509	193549	246086
4802	58224950	Gatman Lake		5336.1	284.959	1.10022	3191.88	0	65487.2	87792.1	89206.2	81255.4	84777.2	107789
2382	46858651	Fir Lake		2393.46	186.427	1.07474	3153.57	0	29373.8	39378.4	40012.7	36446.4	38026.1	48347.9
4934	35205300	Duck Lake		12089.8	750.275	1.9245	2796.21	0	148372	198908	202112	184098	192077	244214
549	58226398	Dead Horse Park		1049.7	138.01	1.20139	3152.85	0	12882.4	17270.2	17548.3	15984.3	16677.1	21203.9
910	58227488	Carl Lake		5266.86	272.595	1.05938	3191.16	0	64637.5	86652.9	88048.7	80201	83677.2	106390
3143	58225134	Brooks Lake		7979.66	346.565	1.09421	3113.96	0	97930.4	131285	133400	121510	126777	161189
1474	82733723	Beaver Lake		14095.9	503.848	1.19691	3022.01	0	172992	231913	235648	214645	223948	284737
1671	58225488	Amy Lake		2720.83	198.372	1.0726	3287.41	0	33391.4	44764.4	45485.5	41431.4	43227.2	54960.8
5192	58226586			13782.2	702.63	1.68801	3229.96	0	169142	226751	230404	209868	218964	278400
409	58226754			14463	466.619	1.09431	3460.79	0	177497	237952	241785	220235	229780	292152
4879	58226874			14224.6	601.177	1.42164	3218.45	0	174572	234031	237800	216606	225994	287338
1655	58227042			13987.3	543.391	1.29584	3093.54	0	171660	230127	233833	212992	222224	282544
5727	58227344			13668	502.568	1.21241	3203.69	0	167741	224873	228495	208130	217150	276094
1824	58227642			14094	547.661	1.30108	2958.41	0	172968	231881	235616	214616	223918	284698
3409	58227996			13566	544.159	1.31767	2828.52	0	166488	223194	226789	206576	215529	274032
3007	72140397			14258.7	458.848	1.08377	3191.21	0	174990	234592	238371	217125	226536	288027
5177	75294489			14239.8	470.525	1.11208	3152.04	0	174758	234281	238054	216837	226235	287645
2544	35205240			13613.1	542.777	1.31205	2830.82	0	167067	223970	227577	207294	216278	274985
5454	72140203			13274.9	506.305	1.23938	3009.43	0	162916	218405	221923	202143	210905	268153
5680	35209602			12916.8	595.883	1.47874	3285.85	0	158522	212514	215937	196691	205216	260920
2613	35210312			13231.8	553.652	1.35748	3253.67	0	162387	217696	221203	201487	210220	267282
5376	40035945			12735.4	789.1	1.97212	2934.61	0	156295	209529	212904	193928	202334	257255
2845	40036387			13351.3	712.263	1.73855	3142.02	0	163854	219662	223200	203307	212119	269696
2922	40036479			13375.1	779.604	1.90122	2949.39	0	164146	220053	223598	203669	212496	270176
463	58223938			12672.8	488.958	1.22502	3372.83	0	155527	208500	211858	192975	201339	255991
3407	58223944			12638.5	483.566	1.21315	3392.56	0	155106	207935	211284	192453	200795	255298
4289	58223992			12522.7	428.213	1.07924	3554.04	0	153685	206030	209349	190690	198955	252959
5047	58224094			13055.1	461.231	1.13851	3401.36	0	160219	214789	218249	198797	207413	263713
4097	58224800			13189.6	545.92	1.34066	3276.95	0	161870	217002	220498	200845	209550	266430
4891	58225204			13439.8	532.936	1.29654	3384.45	0	164940	221119	224680	204655	213525	271484
1995	58225724			13066.2	499.244	1.23182	3322.28	0	160355	214971	218434	198965	207589	263937
5690	58226274			12939.5	438.005	1.08599	3200.64	0	158800	212887	216316	197036	205576	261378
4173	58226354			13314.5	445.193	1.08816	3231.72	0	163402	219057	222585	202746	211534	268953
1642	58226416			12617	422.968	1.06203	3059.52	0	154842	207582	210925	192126	200453	254864
1041	58226592			12624.9	722.146	1.81267	3344.74	0	154939	207711	211056	192245	200577	255022
3285	58226596			13369.1	547.62	1.33578	3252.34	0	164073	219955	223498	203578	212402	270056
4226	58226736			13205.4	573.439	1.4074	3206.64	0	162064	217262	220762	201086	209801	266750
4778	58226752			12994	429.949	1.06378	3216.5	0	159469	213784	217227	197866	206442	262479
861	58227136			12961.9	451.654	1.11887	3154.93	0	159075	213255	216690	197377	205932	261830
2548	58228516			13461.1	538.463	1.30895	2215.61	0	165202	221469	225036	204979	213863	271915
6270	72130589			13102.6	483.759	1.19195	2886.77	0	160802	215571	219043	199521	208168	264673
777	72147879			12641.6	436.702	1.09545	2803.35	0	155145	207987	211337	192501	200844	255361
1167	75280123			12538.2	654.456	1.64843	2834.23	0	153875	206284	209607	190925	199200	253271
5798	75283693			12510.8	512.084	1.29124	3372.56	0	153539	205834	209150	190508	198766	252718
1093	75294467			13118.9	434.704	1.07041	3273.65	0	161002	215839	219316	199769	208427	265003
5296	75294529			12722.9	502.75	1.25709	2858.68	0	156142	209323	212695	193738	202135	257002
6100	75294775			13083.4	481.511	1.18728	3231.37	0	160567	215255	218722	199228	207863	264286
4690	82733921			13243	510.511	1.25118	2911.91	0	162525	217881	221390	201658	210399	267509
812	72140131			12743.4	422.228	1.0549	3152.58	0	156393	209661	213038	194050	202461	257417
1507	72140091			12706.2	430.849	1.07801	2984.09	0	155937	209049	212416	193484	201870	256665
2360	72140123			12477.9	416.634	1.05194	3109.68	0	153136	205293	208600	190008	198243	252055
3045	72155337			11990.4	421.026	1.08443	2983.69	0	147152	197272	200449	182584	190497	242206
3902	35204954			12398.5	539.268	1.36593	2767.46	0	152161	203987	207272	188799	196982	250450
641	40035499			11528.7	424.338	1.11463	3280.27	0	141486	189675	192731	175553	183162	232879
5373	40035827			11508.7	652.625	1.71577	2943.29	0	141240	189346	192396	175248	182844	232475
4489	40036177			12302.5	575.72	1.46394	3204.96	0	150982	202407	205667	187336	195456	248510
3602	40037389			11730.2	431.632	1.124	2862.77	0	143959	192992	196100	178622	186364	236951
3050	46871623			12325.1	473.646	1.20328	2753.75	0	151260	202779	206045	187681	195815	248967
5843	58223952			12473.1	431.541	1.08979	3387.1	0	153076	205213	208519	189934	198166	251956
4945	58224148			11703.4	441.078	1.14992	3517.09	0	143630	192550	195651	178213	185937	236408
5129	58224468			11909.7	448.208	1.15834	3350.38	0	146162	195945	199101	181356	189216	240577
2773	58225090			11734	425.564	1.10803	3237.12	0	144005	193053	196163	178679	186423	237026
1568	58225364			12247.4	553.559	1.41075	3068.53	0	150306	201500	204745	186497	194580	247396
5050	58225466			11789.6	456.075	1.18466	3311.36	0	144688	193968	197092	179526	187307	238150
5133	58225812			12124.7	440.858	1.1292	3260.24	0	148801	199482	202695	184629	192632	244920
2473	58226182			12074.8	397.861	1.02117	3144.08	0	148188	198661	201861	183869	191839	243911
1136	58226196			11594.9	595.313	1.55926	3633.33	0	142299	190766	193838	176562	184215	234218
2355	58226212			11560.2	519.005	1.36143	2787.68	0	141872	190194	193257	176033	183662	233516
5764	58226278			11619.1	475.868	1.24511	3283.77	0	142596	191164	194243	176930	184599	234706
529	58226356			11687.5	552.251	1.44074	3191.97	0	143434	192288	195385	177971	185684	236087
992	58226642			11726.9	663.858	1.72898	3216.51	0	143919	192937	196045	178572	186311	236884
89	58226768			12471.6	423.414	1.06933	3020.33	0	153057	205189	208493	189911	198142	251926
5801	58226926			11898.2	629.212	1.62691	3376.14	0	146021	195755	198908	181180	189033	240344
3384	58227006			12083.6	453.986	1.1648	3339.33	0	148297	198806	202008	184004	191979	244090
1709	58227020			12336.2	450.031	1.14277	3141.12	0	151397	202962	206231	187850	195992	249192
980	58227194			11740.3	419.797	1.09272	3192.82	0	144082	193157	196268	178775	186523	237153
1008	58227268			11573.3	485.964	1.27404	3154.17	0	142033	190410	193477	176232	183871	233781
4916	58227348			12143.4	480.114	1.2288	3106.59	0	149030	199790	203008	184914	192929	245297
5721	58227466			11683.1	480.877	1.25476	3192.35	0	143381	192217	195313	177905	185616	235999
1732	58227476			11870.4	457.389	1.18403	3118.28	0	145679	195298	198443	180756	188591	239782
4817	58228296			11559.1	442.266	1.16019	2732.23	0	141859	190176	193239	176016	183645	233493
756	72130391			12448.3	531.785	1.34428	3155.6	0	152771	204805	208104	189556	197772	251455
3897	75277031			12130.7	456.564	1.16914	2736.7	0	148874	199581	202795	184721	192727	245041
5124	75280337			11560.8	697.582	1.82983	3127.54	0	141879	190203	193267	176041	183672	233527
6142	75294633			11730	444.78	1.15825	3088.72	0	143957	192988	196097	178619	186361	236946
3588	75294785			12344.6	519.074	1.31765	3153.2	0	151499	203099	206370	187977	196124	249360
2092	75294795			11932.2	542.893	1.40172	3170.26	0	146437	196314	199476	181697	189572	241030
2620	75296741			11792.7	441.214	1.14591	3482.76	0	144726	194020	197145	179574	187357	238213
1324	75298817			8623.52	481.845	1.46343	2813.79	0	105832	141878	144164	131315	137006	174195
63	82734093			12030.5	411.582	1.05833	2947.47	0	147644	197932	201120	183195	191135	243016
807	120030843			11857.5	448.082	1.16056	2907.67	0	145521	195085	198228	180560	188386	239521
1752	35205368			11939.4	605.458	1.56279	2924.41	0	146526	196433	199597	181807	189687	241176
2350	72140093			10999.9	398.47	1.07154	3071.02	0	134997	180977	183892	167502	174762	222199
3913	35180840			10791.8	471.082	1.27896	2821.37	0	132442	177551	180411	164332	171454	217994
3845	35180852			11045.4	516.086	1.38497	2813.86	0	135554	181724	184651	168194	175484	223117
2615	35181024			10637.7	505.628	1.38266	3004.34	0	130551	175016	177835	161985	169006	214881
4293	35210310			10592.7	463.912	1.27128	3277.87	0	129999	174276	177083	161300	168291	213972
1060	35210684			10715.8	588.547	1.60353	3303.47	0	131509	176301	179141	163175	170247	216459
1787	35210812			10752.5	433.412	1.17884	3547.68	0	131960	176906	179755	163734	170831	217201
5637	35219172			11317.1	437.744	1.16054	3117.04	0	138889	186194	189193	172331	179800	228605
2813	40035379			11366.6	390.333	1.03259	3315.66	0	139497	187009	190021	173085	180587	229605
5335	40035539			10533.9	436.535	1.19959	3006.52	0	129277	173308	176100	160404	167357	212784
3714	40036035			10910	533.911	1.44166	2931.39	0	133893	179497	182389	166133	173333	220383
1419	40036607			10614.5	436.364	1.19456	2954.39	0	130267	174635	177448	161633	168638	214413
5559	46852533			10840.4	567.943	1.53847	3230.93	0	133038	178351	181224	165072	172226	218976
5553	46852559			11268.5	476.464	1.26591	3244.24	0	138293	185395	188381	171591	179028	227624
231	46867077			10797.3	487.05	1.32198	3177.36	0	132510	177643	180504	164416	171542	218105
2489	46867107			10689.4	444.163	1.21164	3213.83	0	131186	175868	178701	162773	169829	215927
969	46867127			11220.8	703.542	1.87321	3327.1	0	137707	184610	187584	170865	178270	226660
4006	46878203			10688.7	379.516	1.03532	2839.24	0	131178	175856	178689	162763	169817	215913
3321	58224260			11257.7	457.264	1.21548	3556.96	0	138161	185218	188201	171427	178857	227406
1805	58224290			10802.4	437.16	1.18628	3460.53	0	132572	177726	180589	164493	171623	218208
2387	58224370			11473.6	556.095	1.46422	3081.62	0	140810	188770	191810	174715	182287	231767
4428	58224868			10904.7	404.611	1.09279	3400.19	0	133828	179410	182300	166052	173249	220275
422	58224892			10627.2	395.932	1.08322	3370.71	0	130423	174845	177661	161826	168840	214670
248	58225120			10515.6	403.595	1.11003	3436.43	0	129053	173008	175795	160127	167067	212415
2516	58225336			11376.3	441.665	1.16789	3386.04	0	139615	187168	190183	173232	180740	229800
821	58225360			10784.1	531.95	1.44473	3073.88	0	132348	177426	180284	164215	171333	217839
4427	58225424			10543.1	441.496	1.21269	3272.59	0	129390	173460	176254	160545	167503	212970
5723	58225836			10807	446.278	1.21077	3317.43	0	132629	177803	180666	164564	171697	218302
4354	58225922			11289	397.875	1.05615	3461.43	0	138545	185733	188725	171904	179355	228039
5765	58225942			11049.5	544.833	1.46184	3287.47	0	135604	181791	184719	168256	175548	223199
270	58226056			10645.4	528.15	1.44372	3302.24	0	130645	175143	177964	162102	169128	215036
5127	58226470			11346.8	475.693	1.2595	3249.17	0	139254	186684	189691	172784	180273	229206
319	58226660			10661.8	552.924	1.51028	3282.17	0	130847	175413	178238	162352	169389	215368
268	58227316			10585.7	417.767	1.1452	3192.54	0	129913	174161	176966	161193	168180	213831
1883	58227640			11362	821.329	2.17319	3067.76	0	139440	186933	189944	173015	180514	229513
1002	58228350			10709.7	425.901	1.16072	2242.38	0	131435	176201	179039	163082	170150	216336
5689	58228492			10745.7	537.491	1.46238	2217.22	0	131877	176794	179641	163630	170723	217063
5287	72130519			11338.6	551.271	1.46014	2897.69	0	139153	186548	189553	172658	180142	229039
11	72130557			10886.9	449.717	1.21561	2983.93	0	133610	179117	182002	165780	172966	219916
6162	75284005			10805.3	737.314	2.00051	2841.57	0	132608	177774	180638	164538	171669	218267
5269	75294727			11382.3	428.641	1.13315	2860.12	0	139689	187267	190283	173324	180836	229922
594	75298801			11080.2	618.626	1.65753	2881.68	0	135981	182297	185233	168723	176036	223820
1476	82733591			10574.5	463.735	1.27188	3119.34	0	129776	173977	176779	161023	168003	213605
4654	82733781			10518	444.267	1.22176	2926.29	0	129082	173048	175835	160163	167105	212464
2361	72155405			10939.1	479.062	1.29184	3152.09	0	134250	179976	182874	166575	173795	220970
5469	72155339			10864.4	417.237	1.12898	3008.1	0	133334	178747	181626	165438	172609	219462
51	72140139			10176.7	397.16	1.11037	3034.14	0	124894	167433	170129	154966	161683	205570
4925	35205306			10165.9	561.198	1.56982	2883.01	0	124761	167254	169948	154801	161510	205351
476	75280213			10063.1	665.786	1.87188	2871.5	0	123499	165562	168229	153235	159877	203274
4988	35181026			2879.44	330.859	1.73899	3028.72	0	35338	47374	48137.1	43846.7	45747.1	58164.7
3815	35193704			10115.6	441.684	1.23858	2837.65	0	124144	166427	169108	154035	160712	204335
5915	35204938			9622.6	541.37	1.55652	2761.37	0	118093	158316	160866	146528	152879	194377
3253	35209526			10397.8	407.919	1.12826	3336.69	0	127607	171070	173825	158333	165195	210036
3295	35209694			9879.02	405.419	1.15042	3520.24	0	121240	162535	165152	150433	156953	199556
3323	35210744			10103.8	433.512	1.21637	3386.81	0	123999	166233	168910	153856	160524	204097
5632	35219216			10446.8	466.696	1.2878	3300.5	0	128209	171876	174645	159079	165974	211026
2864	40036331			10158.2	490.794	1.37341	3252.87	0	124666	167127	169819	154683	161388	205195
1428	40037071			10282.8	725.529	2.01793	2912.43	0	126196	169178	171903	156582	163369	207713
4087	46846085			10038.7	450.039	1.26683	3180.71	0	123200	165161	167822	152864	159489	202781
3150	46846087			10214.6	414.639	1.15709	3189.95	0	125358	168055	170762	155542	162284	206334
1664	46846139			9816.79	371.41	1.05725	3189.52	0	120477	161511	164112	149485	155964	198299
3149	46852567			10047.3	419.374	1.18001	3195.44	0	123305	165302	167965	152995	159626	202955
3350	58224188			9784.26	499.095	1.42307	3461.47	0	120077	160976	163568	148990	155447	197642
2592	58224324			10085.4	382.827	1.07514	3533.27	0	123773	165930	168603	153576	160232	203725
932	58224330			9839.43	470.184	1.33688	3363.53	0	120754	161883	164491	149830	156324	198757
3237	58224424			10336.2	659.768	1.83029	3328.71	0	126851	170056	172795	157394	164216	208791
4962	58224482			10396.2	388.527	1.07471	3470.42	0	127587	171043	173798	158308	165169	210003
429	58224778			9930.65	516.943	1.46306	3371.44	0	121874	163384	166016	151219	157773	200599
5728	58225446			10205.5	407.896	1.13878	3324.4	0	125247	167906	170611	155405	162140	206151
2649	58225470			10208.6	441.221	1.23163	3559.23	0	125286	167958	170663	155452	162190	206215
3142	58225594			9841.67	458.614	1.30383	3044.29	0	120782	161920	164528	149864	156360	198802
4812	58225710			9983.05	408.947	1.15436	3135.03	0	122517	164246	166892	152017	158606	201658
5781	58226272			10168.4	443.32	1.23994	3337.73	0	124792	167295	169990	154839	161550	205401
2523	58226326			10367.1	588.677	1.63063	3230.96	0	127231	170565	173313	157866	164708	209416
4029	58226454			9867.1	469.612	1.33338	2484.82	0	121094	162338	164953	150251	156764	199315
2578	58226502			10412.6	474.487	1.31145	3369.87	0	127788	171313	174072	158558	165430	210334
5577	58226912			9549.89	544.581	1.57171	3035.9	0	117201	157120	159650	145421	151724	192908
4081	58226998			10031.5	484.029	1.363	3253.19	0	123112	165043	167702	152755	159376	202636
3198	58227082			10152.6	527.971	1.47784	3045.25	0	124598	167036	169727	154599	161300	205084
3119	58227390			9856.15	403.523	1.14636	3072.93	0	120960	162158	164770	150084	156590	199094
327	58227462			10291.4	468.625	1.30285	3168.49	0	126301	169320	172047	156713	163505	207887
507	58228092			9823.42	378.597	1.07734	2253.15	0	120558	161620	164223	149586	156070	198433
5054	58228148			10307.1	479.657	1.33251	2785.12	0	126494	169577	172308	156951	163754	208203
5672	58228314			9928.31	460.596	1.30374	2250.13	0	121845	163346	165977	151183	157736	200552
4665	72130301			9715.33	453.426	1.29743	3178.69	0	119231	159842	162416	147940	154352	196250
2000	75273215			9957.06	362.818	1.02549	3191.5	0	122198	163818	166457	151621	158193	201133
5121	75276679			9822.37	479.999	1.36597	3496.73	0	120545	161603	164206	149570	156053	198412
4343	75277297			9636.95	790.416	2.27088	2772.47	0	118269	158552	161106	146747	153107	194666
5101	75280161			9855.71	370.887	1.05367	2830.09	0	120954	162151	164763	150078	156583	199085
3453	75280277			9657.49	381.325	1.09439	2869.44	0	118522	158890	161449	147059	153433	195081
1297	75294233			9893.87	532.289	1.50929	3009.01	0	121423	162779	165401	150659	157189	199856
4482	75294857			10048.3	392.38	1.104	3120.43	0	123318	165319	167982	153010	159642	202975
1499	82733731			10242.9	480.463	1.33892	3110.28	0	125706	168521	171236	155974	162734	206907
472	75280237			9566.18	387.303	1.11684	2894.81	0	117401	157388	159923	145669	151983	193237
5667	35205140			9444.42	443.303	1.28653	2850.85	0	115907	155384	157887	143815	150048	190777
5093	75280007			9198.06	505.354	1.48613	2918.77	0	112883	151331	153769	140063	146134	185801
2338	72140295			9041.17	502.049	1.48916	3152.66	0	110958	148750	151146	137674	143642	182632
5662	35205326			9030.99	560.22	1.66264	2906.38	0	110833	148582	150976	137519	143480	182426
2630	35181090			8551.79	437.741	1.33505	2889.21	0	104952	140698	142965	130222	135867	172746
5671	35205032			9157.66	577.959	1.70338	2894.88	0	112387	150666	153093	139448	145492	184985
3266	35205264			8753.4	501.15	1.51073	2870.96	0	107426	144015	146335	133292	139070	176819
2185	40035721			8960.39	403.337	1.20174	3028.47	0	109966	147421	149795	136444	142358	181000
3635	40036147			9160.11	424.553	1.25109	3126.89	0	112418	150707	153134	139486	145531	185034
5393	40036315			9119.85	622.674	1.83897	2883.27	0	111923	150044	152461	138872	144892	184221
2238	40036907			9132.2	535.159	1.57944	2925.6	0	112075	150247	152667	139061	145088	184470
2914	40037019			9097.67	481.897	1.42494	2964.09	0	111651	149679	152090	138535	144539	183773
2941	40037063			9071.38	409.044	1.21127	2914.24	0	111328	149247	151651	138134	144122	183242
2954	40037197			9066.09	555.682	1.64598	2788.72	0	111264	149160	151562	138054	144037	183135
2404	46845765			9391.89	454.536	1.32282	2788.67	0	115262	154520	157009	143015	149214	189716
1682	46845769			9239.4	477.066	1.3998	2738.21	0	113391	152011	154460	140693	146791	186636
4059	46845771			9330.67	391.422	1.14287	2785.77	0	114511	153513	155986	142083	148241	188480
2396	46845801			8656.65	441.718	1.33899	2788.31	0	106239	142423	144717	131819	137532	174864
4099	46852479			9063.04	474.182	1.4048	3193.78	0	111226	149110	151511	138007	143989	183073
4022	46858635			8587.67	477.105	1.45206	3168.63	0	105392	141289	143564	130769	136437	173471
4023	46858653			8735	430.69	1.29969	3155.34	0	107200	143713	146027	133012	138777	176447
2320	46871761			9346.44	428.622	1.25043	2993.79	0	114704	153772	156249	142323	148492	188798
4686	46882433			9319.38	424.298	1.23961	3066.5	0	114372	153327	155797	141911	148062	188251
1943	58224026			9424.08	538.941	1.56578	3374.26	0	115657	155050	157547	143505	149725	190366
310	58224410			8618.63	349.776	1.06262	3396.89	0	105772	141798	144082	131240	136928	174096
1024	58224846			9112.77	544.445	1.60856	3336.73	0	111836	149928	152343	138765	144779	184078
1251	58225072			8617.76	429.834	1.3059	3252.06	0	105761	141784	144067	131227	136915	174079
1763	58225286			9092.71	413.209	1.22217	3395.45	0	111590	149598	152007	138459	144460	183673
4920	58225304			9418.71	405.047	1.17711	3265.38	0	115591	154961	157457	143423	149640	190258
4978	58225332			9381.94	399.788	1.1641	3374.83	0	115140	154356	156843	142864	149056	189515
5657	58225400			9248.04	428.997	1.25816	3317.84	0	113497	152153	154604	140825	146928	186810
887	58226434			9104.43	528.067	1.56088	3165.19	0	111734	149791	152203	138638	144647	183909
4053	58226474			8997.12	377.798	1.12335	3143.83	0	110417	148025	150409	137004	142942	181742
5786	58226540			8929.34	491.043	1.46561	3217.86	0	109585	146910	149276	135971	141865	180373
3332	58226598			9412.46	502.95	1.46211	3276.77	0	115514	154858	157353	143328	149540	190132
4162	58227230			9285.27	374.719	1.09677	3192.82	0	113953	152766	155226	141391	147520	187562
2460	58227238			9413.72	391.635	1.13844	3217.13	0	115530	154879	157374	143347	149561	190157
282	58228496			8652.77	363.248	1.10137	2222	0	106191	142360	144653	131760	137471	174786
2984	72130383			8744.36	371.647	1.12092	3104.58	0	107315	143867	146184	133155	138926	176636
758	72150709			9320.51	443.941	1.29692	2486.12	0	114386	153346	155816	141928	148080	188274
1493	72156621			9426.46	625.678	1.81754	2401.03	0	115686	155089	157587	143541	149763	190414
5909	75277081			8702.72	458.248	1.38542	2749.13	0	106804	143182	145488	132521	138265	175795
3896	75277209			8553.83	391.059	1.19253	2717.86	0	104977	140732	142999	130253	135899	172787
1909	75277325			8873.7	375.196	1.12334	2937.54	0	108903	145995	148346	135124	140981	179249
1837	75288987			8721.3	405.215	1.22378	3299.29	0	107032	143487	145798	132804	138560	176170
2629	75289007			8895.93	396.605	1.18596	3250.38	0	109175	146360	148718	135463	141334	179698
5195	75289285			9146.9	427.994	1.26214	2971.71	0	112255	150489	152913	139284	145321	184767
2079	75294063			9297.79	370.891	1.08484	2898.82	0	114107	152972	155436	141582	147719	187815
1351	75294561			8760.84	357.113	1.07607	2882.4	0	107517	144138	146459	133406	139188	176969
5777	75294591			9436.29	623.974	1.81165	3310.59	0	115807	155251	157751	143691	149919	190613
2837	75294623			8690.65	372.545	1.1271	2875.76	0	106656	142983	145286	132337	138073	175551
5197	75298773			9435.41	458.13	1.3302	2957.58	0	115796	155236	157736	143678	149905	190595
23	82733589			8639.87	365.227	1.1082	3036.67	0	106033	142147	144437	131564	137266	174525
1486	82733853			8560.62	381.957	1.16431	2973.65	0	105060	140844	143112	130357	136007	172925
1487	82733867			8536.32	342.924	1.04681	2974.69	0	104762	140444	142706	129987	135621	172434
1250	58227290			8729.92	358.778	1.083	2926.35	0	107138	143629	145942	132935	138697	176344
4911	35205108			8598.34	404.736	1.23104	2755.18	0	105523	141464	143743	130931	136606	173686
5935	35180690			8539	358.446	1.09403	2832.84	0	104795	140488	142751	130028	135663	172488
1520	72140151			8452.53	482.862	1.48128	3009.43	0	103734	139065	141305	128711	134290	170741
4721	72155441			8387.9	440.501	1.35652	3192.68	0	102940	138002	140225	127727	133263	169436
759	58228884			8317.02	540.779	1.67242	2860.82	0	102071	136836	139040	126647	132137	168004
4708	72155395			8114.43	680.441	2.13044	3143.44	0	99584.4	133503	135653	123562	128918	163912
3912	35180742			8424.72	389.496	1.19683	2852.29	0	103392	138608	140840	128287	133848	170179
3842	35180750			8052.01	535.008	1.68157	2906.59	0	98818.3	132476	134610	122612	127926	162651
5979	35180804			8152.57	491.022	1.53377	2907.1	0	100052	134130	136291	124143	129524	164682
5000	35181052			7964.59	356.134	1.12548	2958.08	0	97745.4	131037	133148	121281	126537	160885
2621	35181076			7962.95	377.763	1.19396	2865.21	0	97725.3	131010	133121	121256	126511	160852
3287	35209570			8258.82	394.067	1.22298	3425.71	0	101356	135878	138067	125761	131212	166828
1789	35210784			7816.41	404.598	1.29071	3444.1	0	95926.9	128599	130671	119024	124183	157891
1701	35219224			8351.11	353.219	1.09013	3227.73	0	102489	137397	139610	127167	132678	168693
2830	40035375			8045.39	339.933	1.06888	3312.62	0	98737	132367	134499	122511	127821	162517
4528	40036013			8445.02	338.144	1.03779	3206.18	0	103641	138942	141180	128597	134170	170589
738	40036221			8147.57	354.805	1.10862	2900.51	0	99991	134048	136207	124067	129444	164581
6184	40036849			8238.4	551.788	1.71458	3046.57	0	101106	135542	137725	125450	130888	166416
2408	46845753			7775.36	318.705	1.01938	2754.11	0	95423.1	127924	129985	118399	123531	157062
5539	46848561			8103.55	459.11	1.43842	2580.05	0	99450.8	133324	135471	123397	128745	163692
97	46871621			7689.02	353.324	1.13644	2706.8	0	94363.5	126504	128541	117085	122159	155318
5470	46878205			7985.45	387.406	1.22271	2849.15	0	98001.4	131381	133497	121598	126869	161306
4060	46882431			7539.41	363.324	1.18014	2732.55	0	92527.4	124042	126040	114806	119782	152296
4174	58223972			7709.52	356.254	1.14434	3484.81	0	94615	126841	128884	117397	122485	155732
1049	58224064			8418.2	389.653	1.19778	3523.89	0	103312	138500	140731	128188	133744	170048
1184	58224066			8015.83	380.576	1.19888	3334.06	0	98374.3	131880	134005	122061	127351	161920
4746	58224118			8204.12	361.522	1.12571	3169.09	0	100685	134978	137152	124928	130343	165723
1770	58224624			8160.01	345.265	1.07799	3507.38	0	100144	134253	136415	124257	129642	164832
1149	58224796			7717.15	358.774	1.15186	3371.22	0	94708.7	126966	129011	117513	122606	155886
3304	58224880			8002.11	384.058	1.21088	3462.2	0	98205.9	131655	133775	121852	127134	161643
1058	58224890			7994.88	435.084	1.37238	3436.29	0	98117.2	131536	133654	121742	127019	161497
2504	58225018			8225.58	360.981	1.12256	3251.27	0	100948	135331	137511	125255	130684	166157
239	58225098			7602.45	403.063	1.30378	3252.59	0	93301.1	125079	127094	115766	120784	153570
5605	58225140			7675.29	354.274	1.14051	3303.45	0	94195	126278	128312	116876	121941	155041
4852	58225362			8449.56	404.404	1.24081	3264.08	0	103697	139016	141256	128666	134242	170681
4941	58225394			8021.48	368.295	1.15978	3399.88	0	98443.6	131973	134099	122147	127441	162034
4125	58225690			8359.98	407.182	1.25601	3302.15	0	102598	137543	139758	127302	132819	168872
956	58225786			8266.7	401.08	1.24415	3252.05	0	101453	136008	138198	125881	131337	166987
2027	58225818			7790.08	366.738	1.1719	3143.1	0	95603.8	128166	130231	118624	123765	157360
5821	58225874			7552.3	340.002	1.10344	3448.43	0	92685.6	124254	126256	115003	119987	152557
4156	58226156			8470.58	432.847	1.32643	3230.38	0	103955	139362	141607	128986	134576	171106
5010	58226534			7726	364.551	1.16974	3217.22	0	94817.4	127112	129159	117648	122747	156065
4305	58226564			7661.25	442.091	1.42452	3340.39	0	94022.7	126047	128077	116662	121718	154757
2566	58226634			8294.2	346.182	1.07207	3251.11	0	101791	136460	138658	126300	131774	167543
4714	58226670			8169.02	581.414	1.8143	2995.78	0	100254	134401	136566	124394	129785	165014
1765	58226680			8126.71	708.113	2.2154	3277.67	0	99735.1	133705	135858	123749	129113	164160
2436	58226944			7716.65	318.39	1.02224	3145.95	0	94702.5	126958	129003	117505	122598	155876
3274	58227038			7917.28	332.886	1.05515	3158.04	0	97164.9	130259	132357	120560	125786	159929
157	58227124			7710.85	335.808	1.07857	3241.07	0	94631.4	126863	128906	117417	122506	155759
4197	58227454			7536.82	355.733	1.15568	3120.37	0	92495.6	124000	125997	114767	119741	152244
3065	58227572			7540.33	471.273	1.53068	2582.7	0	92538.8	124057	126056	114820	119797	152315
832	58227826			7826.66	393.093	1.25318	2254.9	0	96052.7	128768	130842	119180	124346	158099
5832	58228030			8307.39	422.046	1.30598	2815.17	0	101952	136677	138879	126501	131984	167809
1977	58228064			8114.92	359.125	1.12437	2259.14	0	99590.4	133511	135661	123570	128926	163921
506	58228130			8476.89	383.847	1.17584	2303.59	0	104033	139466	141712	129082	134677	171233
2666	58228164			7604.83	339.972	1.09953	2778.11	0	93330.3	125119	127134	115803	120822	153618
1730	58228342			8063.42	362.25	1.13777	2243.33	0	98958.4	132663	134800	122786	128108	162881
4195	58228550			8264.11	434.306	1.34743	2216.76	0	101421	135965	138155	125842	131296	166935
2983	72150725			7999.04	366.889	1.15697	2351.95	0	98168.2	131604	133724	121805	127085	161581
2998	72155295			8191.21	357.023	1.11258	2436.87	0	100527	134766	136937	124732	130138	165462
5911	75277099			7671.1	348.947	1.12367	2711.34	0	94143.6	126209	128242	116812	121875	154956
1180	75280223			7924.62	358.935	1.1372	2894.71	0	97254.8	130380	132480	120672	125902	160077
1974	75280361			7633.15	346.499	1.11856	3146.64	0	93677.8	125584	127607	116234	121272	154190
2635	75283683			8360.36	450.043	1.38819	3361.3	0	102603	137549	139764	127307	132825	168879
2656	75283733			8147.28	437.246	1.36624	3279.74	0	99987.4	134043	136202	124063	129440	164575
5187	75289277			7869.56	447.277	1.42203	2988.15	0	96579.2	129474	131559	119834	125028	158965
3533	75289357			8265.21	425.241	1.31922	2913.19	0	101435	135983	138174	125859	131314	166957
3585	75289485			7837.09	390.633	1.24451	2788.74	0	96180.7	128940	131017	119339	124512	158309
1315	75294079			7860.93	403.531	1.28365	2866.32	0	96473.3	129332	131415	119702	124891	158791
1295	75294653			7751.53	343.257	1.0996	3253.82	0	95130.6	127532	129586	118036	123152	156581
2040	75298775			8092.01	362.263	1.1358	3008.34	0	99309.2	133134	135278	123221	128562	163459
5701	82733923			8035.25	357.887	1.12604	2485.77	0	98612.6	132200	134329	122357	127660	162312
1532	72155367			7888.44	370.389	1.17617	3067.97	0	96810.9	129785	131875	120121	125328	159346
5896	35193868			7600.12	421.473	1.36354	2930.84	0	93272.5	125041	127055	115731	120747	153522
2351	72155381			7522.25	451.718	1.46893	3117.16	0	92316.9	123760	125753	114545	119510	151950
402	75277393			7246.2	448.907	1.48734	2944.63	0	88929	119218	121138	110342	115124	146373
5930	35180622			6529.71	363.743	1.26957	2863.38	0	80135.8	107430	109160	99431.1	103741	131900
3944	35180864			7357.82	406.365	1.33613	2948.61	0	90298.8	121054	123004	112041	116897	148628
3801	35180930			6552.68	303.59	1.05776	2949.69	0	80417.7	107808	109544	99780.9	104106	132364
1839	35181092			6899.86	346.321	1.17589	2993.49	0	84678.5	113520	115348	105068	109622	139377
1064	35181202			7404.22	333.719	1.09383	3255.76	0	90868.3	121818	123780	112748	117635	149565
1793	35210772			6768.14	320.275	1.09798	3422.01	0	83062	111353	113146	103062	107529	136716
4155	35219190			7271.94	382.199	1.26407	3254.35	0	89244.8	119642	121569	110733	115533	146893
3607	40036149			7205.67	351.792	1.16884	3264.51	0	88431.6	118551	120461	109724	114480	145554
4539	40036153			6947.13	366.153	1.23899	3264.72	0	85258.7	114298	116139	105787	110373	140332
701	40036541			7042.74	365.648	1.22885	2943.09	0	86432.1	115871	117737	107243	111892	142263
3682	40036671			6833.35	638.182	2.17739	2944.51	0	83862.3	112426	114237	104055	108565	138034
1389	40036691			6643.62	464.972	1.60891	3033.42	0	81533.8	109304	111065	101166	105551	134201
705	40036813			6760.35	484.745	1.66279	2933.2	0	82966.3	111225	113016	102943	107405	136559
699	40036831			6524.5	362.188	1.26464	2944.09	0	80071.9	107344	109073	99351.8	103658	131795
5340	40036977			6774.11	380.115	1.30255	2981.25	0	83135.3	111451	113246	103153	107624	136837
2927	40037037			6709.06	376.271	1.29562	2954.71	0	82336.9	110381	112159	102162	106590	135523
136	46845759			7334.42	338.43	1.11453	2778.29	0	90011.6	120669	122613	111685	116526	148155
3115	46848703			7071.58	384.593	1.28988	2731.42	0	86785.9	116345	118219	107682	112350	142846
225	46849727			7064.26	397.291	1.33316	2853.33	0	86696.1	116225	118097	107571	112233	142698
3075	46858637			6836.93	333.673	1.13815	3142.49	0	83906.2	112485	114296	104109	108622	138106
1687	46867147			6962.08	378.825	1.28049	3317.7	0	85442.1	114544	116389	106015	110610	140634
259	58223994			6844.63	327.215	1.11549	3474.45	0	84000.8	112611	114425	104227	108744	138262
1199	58224012			7155.13	315.792	1.05293	3397.57	0	87811.4	117720	119616	108955	113677	144534
1792	58224212			7374.23	326.541	1.07248	3569.39	0	90500.3	121325	123279	112291	117158	148960
5015	58224246			6504.2	318.337	1.11326	3532.73	0	79822.8	107010	108734	99042.7	103335	131385
3204	58224294			6562.03	380.152	1.32357	3322.67	0	80532.5	107962	109701	99923.2	104254	132553
6056	58224746			6687.29	327.464	1.1294	3317.12	0	82069.7	110023	111795	101831	106244	135083
3276	58224820			6675.41	346.588	1.19641	3340.96	0	81923.9	109827	111596	101650	106056	134843
5610	58224896			6556.3	340.386	1.18563	3194.01	0	80462.2	107868	109605	99836.1	104163	132437
5658	58224916			7215.72	411.896	1.36759	3313.41	0	88555	118717	120629	109877	114640	145758
835	58224982			6587.87	310.953	1.08051	3092.78	0	80849.6	108387	110133	100317	104665	133075
2010	58225212			6626.48	391.67	1.35702	3253.1	0	81323.5	109022	110778	100905	105278	133855
273	58225216			6515.06	384.182	1.34241	3278.67	0	79956.1	107189	108915	99208.1	103508	131604
975	58225398			7039.45	305.479	1.02688	3384.82	0	86391.6	115816	117682	107193	111839	142197
2517	58225510			7036.7	323.803	1.08869	3322.62	0	86357.9	115771	117636	107151	111796	142141
5503	58225568			6778.7	297.875	1.0204	3008.07	0	83191.6	111527	113323	103223	107697	136930
2758	58225726			7335.25	378.112	1.24515	3236.95	0	90021.8	120683	122627	111698	116539	148172
5602	58226030			6836.54	326.492	1.11369	3204.21	0	83901.4	112478	114290	104103	108615	138098
5819	58226418			7399.85	323.696	1.06129	3327.03	0	90814.7	121746	123707	112681	117565	149477
1734	58226568			7146.55	413.252	1.37871	3191.31	0	87706.1	117579	119473	108824	113541	144360
1776	58226668			6688.11	317.171	1.09383	3264.75	0	82079.8	110036	111808	101843	106257	135100
2463	58226928			6844.42	337.604	1.15092	2983.86	0	83998.2	112608	114422	104223	108741	138257
2522	58226982			6940.28	352.126	1.19211	3241.82	0	85174.6	114185	116024	105683	110264	140194
2461	58227142			7363.04	373.322	1.22705	3129.36	0	90362.9	121140	123092	112121	116980	148733
1525	58227148			6632.41	316.327	1.09549	2988.5	0	81396.3	109120	110877	100995	105372	133975
3239	58227156			6514.75	337.98	1.181	3204.44	0	79952.3	107184	108910	99203.4	103503	131598
3500	58227308			7093.87	331.009	1.10842	3069.33	0	87059.5	116712	118592	108022	112704	143296
599	58227548			6506.78	411.391	1.4384	3098.35	0	79854.5	107053	108777	99082	103376	131437
440	58227786			7212.58	431.09	1.43163	2935.48	0	88516.3	118665	120576	109830	114590	145694
122	58227806			6957.87	513.735	1.73703	2254.76	0	85390.4	114474	116318	105951	110543	140549
3328	58228498			7024.09	774.769	2.60726	2301.54	0	86203.2	115564	117425	106959	111595	141887
4269	72137311			7416.92	406.269	1.33048	3081.13	0	91024.2	122027	123992	112941	117836	149822
5496	72140205			7221.69	445.203	1.47756	3204.46	0	88628.2	118815	120729	109968	114735	145878
766	72150729			7398.93	356.479	1.16884	2386.04	0	90803.4	121731	123692	112667	117551	149458
33	72150743			6511.9	442.055	1.54501	2402.14	0	79917.2	107137	108863	99159.9	103458	131540
3153	72156633			7423.83	336.394	1.10114	2873.25	0	91108.9	122140	124108	113046	117946	149961
2025	75273289			7023.25	327.971	1.10376	3301.21	0	86192.9	115550	117411	106947	111582	141870
6016	75276741			6735.23	318.579	1.09484	3345.66	0	82658.2	110811	112596	102561	107006	136052
3890	75277213			6881.5	416.753	1.41692	2815.98	0	84453.2	113218	115041	104788	109330	139006
423	75283701			6703.28	348.506	1.20053	3338.52	0	82266	110286	112062	102074	106498	135406
5264	75283961			7053.34	383.524	1.28796	2889.08	0	86562.2	116045	117914	107405	112060	142478
1291	75289319			6917.92	412.816	1.39983	2909.76	0	84900.2	113817	115650	105343	109909	139742
3522	75289411			7213.01	456.322	1.51538	2983.65	0	88521.7	118672	120584	109836	114597	145703
5256	75294659			6809.2	382.082	1.30592	3156.95	0	83565.9	112028	113833	103687	108181	137546
5217	75294773			7439.92	321.821	1.0523	3239.53	0	91306.4	122405	124377	113291	118202	150286
2102	75298845			6987.39	343.46	1.15885	2813.49	0	85752.7	114960	116812	106400	111012	141145
3032	82733501			7146.34	446.922	1.49107	3105.32	0	87703.4	117575	119469	108821	113537	144356
767	82733625			6698.41	536.993	1.85051	3073.82	0	82206.2	110206	111981	102000	106421	135308
2313	82733629			7093.33	338.179	1.13248	3080.23	0	87052.8	116703	118583	108014	112695	143285
14	82733713			7093.35	401.901	1.34586	2995.87	0	87053.2	116703	118583	108014	112696	143286
22	82733725			7445.24	341.256	1.11545	2957.89	0	91371.7	122493	124466	113372	118286	150394
45	82733873			7085.61	326.683	1.09457	2982.45	0	86958.1	116576	118454	107896	112573	143129
2999	82733889			7483.15	398.481	1.29919	2984.65	0	91836.9	123116	125099	113950	118888	151160
92	72140089			6911.57	307.044	1.04164	3156.32	0	84822.3	113713	115544	105246	109808	139614
5480	72140083			6766.71	353.736	1.21282	3179.18	0	83044.5	111329	113123	103040	107506	136688
998	35205172			6665.21	298.713	1.03194	2829.52	0	81798.8	109659	111426	101494	105894	134637
2301	72130207			6585.5	310.124	1.07782	3166.74	0	80820.6	108348	110093	100281	104627	133027
3054	72140383			6559.45	337.989	1.177	3159.28	0	80500.9	107919	109658	99884.1	104213	132501
4216	35205150			6346.09	305.621	1.08202	2888.52	0	77882.4	104409	106091	96635.1	100824	128191
3263	35205318			6275.2	287.688	1.02427	2907.15	0	77012.4	103243	104906	95555.6	99697.3	126759
5477	72140311			6195.61	295.548	1.05899	3117.75	0	76035.7	101933	103575	94343.7	98432.8	125151
5890	35180788			6410.55	293.627	1.03432	2829.8	0	78673.4	105470	107168	97616.6	101848	129493
3809	35180806			5521.73	296.401	1.12499	2821.5	0	67765.4	90846.2	92309.5	84082.1	87726.4	111539
3956	35180816			5607.08	328.856	1.23864	2889.58	0	68812.9	92250.5	93736.4	85381.9	89082.5	113263
5927	35180892			5581.71	355.394	1.34163	2895.06	0	68501.6	91833.1	93312.3	84995.5	88679.5	112751
3775	35182274			5976.02	306.402	1.11788	2677.93	0	73340.8	98320.6	99904.2	90999.9	94944.1	120716
5957	35182328			5839.16	339.033	1.25134	2797.99	0	71661.1	96068.8	97616.2	88915.9	92769.7	117951
4203	35204976			5762.05	283.951	1.05502	2737.99	0	70714.8	94800.1	96327.1	87741.6	91544.6	116393
1022	35204992			5497.7	304.108	1.15676	2737.62	0	67470.5	90450.9	91907.8	83716.2	87344.7	111054
1014	35205370			5798.12	286.69	1.06188	2888.15	0	71157.4	95393.5	96930	88290.8	92117.6	117122
4220	35205396			5540.92	507.824	1.92411	2809.76	0	68001	91162.1	92630.4	84374.4	88031.4	111927
4892	35209532			6408.17	340.649	1.20018	3413.26	0	78644.2	105430	107129	97580.3	101810	129445
2608	35210274			5653.94	306.993	1.15149	3096.79	0	69388	93021.5	94519.8	86095.4	89827	114210
4294	35210300			5633.48	305.317	1.14728	3238.9	0	69136.9	92684.8	94177.7	85783.8	89501.9	113796
5280	40035501			6235.09	307.141	1.09704	3242.57	0	76520.2	102583	104235	94944.9	99060	125949
2120	40036121			5519.74	353.865	1.34334	3219.59	0	67741	90813.5	92276.2	84051.8	87694.8	111499
1363	40036183			6300.94	423.234	1.50378	3133.23	0	77328.3	103666	105336	95947.6	100106	127279
2812	40036259			5825.11	312.086	1.15327	3192.31	0	71488.7	95837.7	97381.4	88701.9	92546.5	117667
1328	40036503			6412.97	448.669	1.58017	3141.63	0	78703.2	105509	107209	97653.5	101886	129542
4601	40036603			6310.77	443.898	1.57597	2941.2	0	77449	103828	105500	96097.3	100262	127478
733	40036661			5902.39	490.882	1.80207	2861.06	0	72437.1	97109.1	98673.2	89878.6	93774.2	119228
3547	40036713			5567.01	415.656	1.5712	3219.05	0	68321.1	91591.2	93066.4	84771.6	88445.8	112454
1387	40036917			5774.34	304.664	1.13078	3040.79	0	70865.5	95002.3	96532.5	87928.7	91739.8	116642
3698	40037027			6056.18	389.842	1.41285	2921.31	0	74324.5	99639.3	101244	92220.5	96217.6	122335
3678	40037065			6391.41	475.76	1.67841	2961.96	0	78438.6	105155	106848	97325.2	101543	129106
2844	40037301			5818.1	448.535	1.65849	3008.58	0	71402.7	95722.3	97264.1	88595.2	92435.1	117526
5520	46845713			5566.05	290.067	1.09656	2739.92	0	68309.3	91575.4	93050.4	84757	88430.6	112434
4135	46846071			5613.36	306.462	1.15365	3382.57	0	68890	92353.9	93841.4	85477.5	89182.3	113390
4762	46846099			6144.4	355.096	1.27766	3227.66	0	75407.2	101091	102719	93563.9	97619.2	124117
2401	46846155			6305.06	340.349	1.20889	3313.82	0	77378.8	103734	105405	96010.2	100172	127362
4054	46846159			6140.12	294.093	1.05853	3327.06	0	75354.6	101020	102647	93498.6	97551.1	124030
4831	46846163			6124.3	346.507	1.2488	3284.08	0	75160.5	100760	102383	93257.8	97299.9	123711
5574	46852471			5524.6	369.954	1.4038	3252.79	0	67800.7	90893.6	92357.6	84125.9	87772.2	111597
5573	46852521			6412.75	352.073	1.23999	3120.33	0	78700.5	105506	107205	97650.2	101883	129538
5555	46852535			6017.88	358.757	1.30433	3250.41	0	73854.4	99009.1	100604	91637.2	95609	121561
4722	46878191			6028.82	302.333	1.09819	2788.2	0	73988.8	99189.2	100787	91803.9	95783	121782
1888	58223914			6248	303.593	1.08325	3426.43	0	76678.6	102795	104451	95141.5	99265.2	126210
1941	58223942			6013.87	311.384	1.13247	3376.05	0	73805.3	98943.3	100537	91576.3	95545.4	121480
1815	58223988			5651.61	400.38	1.50208	3554.39	0	69359.4	92983.1	94480.8	86059.9	89789.9	114163
221	58224034			5856.59	346.162	1.27575	3399.78	0	71875	96355.5	97907.5	89181.2	93046.5	118303
4043	58224128			5703.03	272.439	1.01748	3144.66	0	69990.4	93829	95340.3	86842.8	90606.8	115201
3457	58224140			5585.63	291.611	1.10046	3312.53	0	68549.7	91897.6	93377.8	85055.2	88741.7	112830
4253	58224296			6421.57	316.436	1.11371	3560.61	0	78808.8	105651	107353	97784.5	102023	129716
4032	58224358			6059.77	486.468	1.76252	3071.24	0	74368.6	99698.4	101304	92275.2	96274.6	122407
1907	58224966			6293.43	316.552	1.1254	3313.79	0	77236.1	103543	105210	95833.2	99986.8	127127
2650	58225078			5877.17	297.878	1.09588	3480.75	0	72127.5	96694.1	98251.5	89494.6	93373.5	118719
5616	58225354			5629.99	309.477	1.16327	3218.2	0	69094	92627.4	94119.3	85730.6	89446.4	113726
2384	58225522			6137.82	297.676	1.07163	3008.7	0	75326.4	100983	102609	93463.7	97514.7	123984
971	58225548			6227.27	411.464	1.47059	3240.85	0	76424.2	102454	104104	94825.8	98935.8	125791
3373	58225628			5595.5	289.968	1.0933	3439.73	0	68670.8	92059.9	93542.8	85205.5	88898.5	113029
3293	58225708			5824.23	287.328	1.06186	3336.35	0	71477.9	95823.2	97366.6	88688.5	92532.5	117650
4298	58225758			5686.81	383.503	1.43431	3297.51	0	69791.4	93562.2	95069.2	86595.9	90349.2	114874
2513	58225766			6494.96	316.4	1.10727	3389.45	0	79709.4	106858	108579	98901.9	103189	131198
3338	58225824			5932.68	309.77	1.13428	3218.17	0	72808.8	97607.4	99179.6	90339.9	94255.4	119840
1557	58225844			6139.32	329.806	1.18715	2973.87	0	75344.8	101007	102634	93486.5	97538.5	124014
4149	58225912			5703.02	277.966	1.03812	3164.72	0	69990.3	93828.9	95340.2	86842.7	90606.7	115201
5601	58225928			6076.34	286.295	1.03586	3217.35	0	74571.8	99970.9	101581	92527.4	96537.8	122742
389	58225968			5973.73	427.948	1.56162	3365.36	0	73312.6	98282.7	99865.8	90964.9	94907.6	120669
5137	58226142			6018.14	352.701	1.28228	3226.25	0	73857.7	99013.5	100608	91641.3	95613.3	121566
4851	58226476			6340.34	389.658	1.38018	3135.55	0	77811.9	104314	105995	96547.6	100732	128075
3275	58226646			5526.76	281.789	1.06905	3081.47	0	67827.2	90929	92393.6	84158.8	87806.4	111641
5546	58226748			5946.73	370.369	1.35458	3159.33	0	72981.3	97838.6	99414.5	90553.9	94478.7	120124
5641	58226802			5772.32	289.574	1.07496	3080.25	0	70840.8	94969.1	96498.8	87898	91707.8	116601
160	58226816			5852.93	310.268	1.14382	3165.18	0	71830	96295.3	97846.3	89125.4	92988.4	118229
3152	58226964			5867.74	397.761	1.46452	3140.36	0	72011.9	96539	98094	89351	93223.8	118528
4873	58226968			5880.79	321.186	1.18126	3119.72	0	72172	96753.6	98312.1	89549.7	93431	118792
1053	58227002			6076	345.624	1.25056	3259.25	0	74567.7	99965.4	101576	92522.3	96532.5	122735
990	58227016			5726.44	315.493	1.17586	3251.38	0	70277.8	94214.3	95731.8	87199.4	90978.9	115674
5653	58227190			5706.41	293.709	1.09659	3273.78	0	70031.9	93884.7	95396.9	86894.3	90660.6	115269
442	58227264			5496.79	288.398	1.0971	3237.92	0	67459.4	90436	91892.7	83702.4	87330.3	111035
3312	58227328			5828.22	288.465	1.0657	3192.31	0	71526.9	95888.8	97433.3	88749.3	92595.9	117730
4239	58227444			5544.6	308.863	1.16987	3143.18	0	68046.1	91222.6	92691.9	84430.4	88089.9	112001
425	58228128			6175.4	339.139	1.21717	2791.33	0	75787.6	101601	103237	94035.9	98111.7	124743
3404	58228142			5902.18	408.208	1.49859	2776.69	0	72434.5	97105.7	98669.7	89875.5	93770.9	119224
1020	58228592			5764.15	565.792	2.10183	2212.91	0	70740.6	94834.7	96362.2	87773.6	91578	116436
58	72147717			5958.09	354.497	1.29529	2646.39	0	73120.7	98025.5	99604.4	90726.9	94659.2	120353
813	72156627			5949.11	373.187	1.36461	3194.92	0	73010.5	97877.8	99454.3	90590.1	94516.5	120172
5105	72156631			5742.33	294.143	1.09477	2899.94	0	70472.7	94475.6	95997.3	87441.3	91231.2	115995
3476	75273295			5811.93	336.39	1.24449	3169.36	0	71326.9	95620.8	97160.9	88501.2	92337	117401
3975	75276997			6070.75	309.298	1.1196	2686.96	0	74503.2	99878.9	101488	92442.3	96449	122629
3816	75277135			5714.53	319.286	1.19124	2773.91	0	70131.5	94018.3	95532.6	87018	90789.6	115433
4337	75277271			6191.34	314.84	1.12851	2834.32	0	75983.2	101863	103504	94278.7	98364.9	125065
1854	75277399			5624.4	354.811	1.33434	3022.28	0	69025.5	92535.5	94026	85645.6	89357.7	113613
1155	75280139			5947.11	292.669	1.07036	2852	0	72986	97844.9	99420.9	90559.7	94484.8	120132
1154	75283815			6152.41	337.549	1.21373	3571.8	0	75505.5	101223	102853	93685.9	97746.5	124279
5768	75288965			6417.02	314.199	1.10623	3398.83	0	78752.8	105576	107276	97715.1	101950	129624
2857	75294821			5932.09	309.322	1.1327	3094.9	0	72801.6	97597.8	99169.8	90330.9	94246.1	119828
1310	75298793			6488.31	398.709	1.39604	2850.88	0	79627.8	106749	108468	98800.7	103083	131064
4676	82733653			5831.1	546.357	2.01794	3037.06	0	71562.2	95936.2	97481.4	88793.1	92641.6	117788
74	82733693			6427.89	313.944	1.1044	3025.02	0	78886.3	105755	107458	97880.7	102123	129843
4653	82733773			6312.53	308.789	1.09614	2960.65	0	77470.6	103857	105530	96124.1	100290	127513
5426	82733893			6392.7	357.24	1.26016	2971.01	0	78454.5	105176	106870	97344.9	101564	129133
3752	82734061			6038.1	357.328	1.29695	2447.34	0	74102.6	99341.9	100942	91945.2	95930.4	121970
6292	120025294			6472.48	358.351	1.25626	2785.79	0	79433.5	106488	108204	98559.6	102831	130744
983	35188434			5893.51	338.352	1.24305	2877.51	0	72328.1	96963	98524.7	89743.4	93633.1	119049
4742	72140235			5864.49	331.346	1.22032	3169.76	0	71972	96485.5	98039.6	89301.5	93172.1	118463
3018	72140267			5825.67	317.799	1.17432	3179.26	0	71495.5	95846.8	97390.6	88710.4	92555.3	117679
5491	72140219			5603.99	327.894	1.23536	3095.09	0	68774.9	92199.6	93684.6	85334.7	89033.3	113201
4700	72140213			5400.13	312.157	1.19806	3046.02	0	66273.2	88845.7	90276.8	82230.6	85794.6	109083
4743	58224206			5205.1	263.797	1.03125	3131.16	0	63879.6	85636.9	87016.3	79260.7	82696.1	105143
5442	72140209			5174.91	284.982	1.11731	3093.98	0	63509.1	85140.3	86511.6	78801	82216.5	104533
2339	72140163			5164.7	265.513	1.04201	2985.59	0	63383.8	84972.2	86340.9	78645.5	82054.2	104327
1560	72140165			5123.82	410.739	1.61837	3242.3	0	62882	84299.6	85657.4	78022.9	81404.6	103501
5716	35205276			5061.55	293.095	1.16192	2816.99	0	62117.9	83275.2	84616.5	77074.8	80415.4	102243
3785	35180566			4744.37	597.697	2.44737	2746.73	0	58225.3	78056.7	79314	72244.9	75376.2	95836.3
5885	35180726			5181.89	431.252	1.68964	2906.92	0	63594.8	85255.1	86628.3	78907.3	82327.4	104674
3803	35180814			5257.84	274.529	1.0678	2905.29	0	64526.9	86504.7	87898	80063.8	83534	106208
5929	35180872			4681.13	380.094	1.56684	2809.05	0	57449.2	77016.3	78256.8	71282	74371.5	94558.9
5879	35180916			5284.91	308.649	1.19744	2913.49	0	64859.1	86950	88350.5	80476	83964	106755
3910	35180936			5389.01	299.214	1.14957	2834.5	0	66136.7	88662.8	90090.8	82061.2	85618	108858
5003	35180942			4838.41	265.471	1.0764	2852.17	0	59379.4	79604	80886.2	73677	76870.3	97736
4315	35180978			4724.57	316.038	1.29678	2974.26	0	57982.3	77731	78983	71943.4	75061.6	95436.3
4999	35181068			4772.17	269.295	1.09946	2889.72	0	58566.4	78514.1	79778.7	72668.2	75817.8	96397.8
6321	35182332			4606.42	268.582	1.1161	2755.94	0	56532.2	75787.1	77007.8	70144.2	73184.4	93049.6
6255	35182346			4798.51	273.993	1.11556	2834.11	0	58889.7	78947.5	80219.1	73069.3	76236.3	96929.9
3789	35193682			4561.48	325.256	1.35825	2827.29	0	55980.8	75047.8	76256.5	69459.9	72470.5	92141.9
5923	35204744			5317.66	392.766	1.51908	2705.9	0	65261	87488.8	88898	80974.7	84484.3	107417
5975	35204764			5020.61	321.693	1.28047	2743.16	0	61615.5	82601.6	83932.1	76451.4	79765	101416
5873	35204936			4695.78	311.231	1.28096	2717.47	0	57629	77257.3	78501.7	71505	74604.2	94854.7
5665	35205180			5172.98	339.664	1.33195	2816.62	0	63485.4	85108.5	86479.3	78771.6	82185.7	104494
4896	35205186			4658.85	301.563	1.24608	2792.2	0	57175.8	76649.8	77884.4	70942.7	74017.5	94108.8
4894	35205320			4954.75	293.523	1.17609	2901.55	0	60807.2	81518	82831	75448.4	78718.6	100086
5663	35205338			3350.8	283.674	1.38214	2917.8	0	41122.7	55129	56017	51024.3	53235.8	67686.1
4893	35209502			4651.29	294.307	1.21709	3338.93	0	57082.9	76525.3	77757.9	70827.5	73897.3	93956
1721	35209508			5197.48	285.322	1.11621	3378.79	0	63786	85511.5	86888.8	79144.6	82574.9	104989
1744	35209512			4608.36	283.437	1.17758	3241.58	0	56556.2	75819.1	77040.3	70173.9	73215.4	93089
5706	35209700			4520.2	286.107	1.20021	3422.88	0	55474.1	74368.6	75566.4	68831.3	71814.6	91308
4233	35210376			5406.14	292.417	1.12168	3374.88	0	66346.8	88944.5	90377.1	82322	85890	109204
1050	35210754			5037.21	278.816	1.10798	3401.87	0	61819.1	82874.6	84209.5	76704.1	80028.6	101752
4154	35219188			4523.18	358.951	1.50529	3266.04	0	55510.7	74417.6	75616.2	68876.7	71862	91368.2
3791	35227620			4649.54	276.763	1.14475	2768	0	57061.4	76496.5	77728.6	70800.8	73869.5	93920.6
3774	35227624			4699.11	335.737	1.38133	2798.53	0	57669.8	77312	78557.3	71555.6	74657	94921.9
1411	40035569			5452.84	305.603	1.16722	2980.56	0	66920	89712.9	91157.9	83033.2	86632.1	110147
5358	40035597			4793.03	309.095	1.2592	2972.84	0	58822.5	78857.3	80127.5	72985.9	76149.3	96819.2
5321	40035605			4532.13	289.826	1.21421	3029.73	0	55620.5	74564.8	75765.8	69012.9	72004.1	91548.9
3666	40035727			5236.75	282.479	1.10094	3011.16	0	64268.1	86157.7	87545.4	79742.7	83198.9	105782
3667	40035777			4935.48	430.75	1.72929	3009.95	0	60570.7	81201.1	82509	75155.1	78412.5	99696.8
1402	40035909			4775.16	309.435	1.26294	2997.58	0	58603.1	78563.2	79828.7	72713.7	75865.3	96458.1
6221	40035937			4705.49	322.382	1.32549	2936.7	0	57748.1	77417.1	78664	71652.9	74758.5	95050.9
6135	40035999			4812.19	294.348	1.19673	3253.86	0	59057.6	79172.6	80447.8	73277.6	76453.7	97206.3
6227	40036101			4649.5	272.321	1.12638	2923.56	0	57061	76496	77728.1	70800.3	73869	93920
1445	40036211			5457.63	281.548	1.07488	2912	0	66978.8	89791.7	91237.9	83106.1	86708.1	110244
5235	40036299			5137.55	277.787	1.09305	3178.56	0	63050.6	84525.6	85887	78232.1	81622.9	103779
2216	40036581			4649.23	425.071	1.75824	2961.39	0	57057.7	76491.5	77723.5	70796.2	73864.7	93914.5
3686	40036989			4754.63	309.597	1.26633	2943.77	0	58351.2	78225.5	79485.5	72401.1	75539.2	96043.5
2246	40037021			4563.33	285.732	1.19296	2895.3	0	56003.4	75078.1	76287.4	69488.1	72499.8	92179.2
4616	40037117			4754.68	280.529	1.14743	2910.89	0	58351.9	78226.4	79486.4	72401.9	75540	96044.6
841	46845917			5142.59	300.889	1.18338	2796.76	0	63112.4	84608.4	85971.2	78308.8	81702.9	103880
935	46845919			5019.02	298.413	1.188	3017.31	0	61595.9	82575.4	83905.5	76427.1	79739.7	101384
2394	46845933			5468.23	282.84	1.07876	2800.36	0	67108.9	89966.1	91415.2	83267.5	86876.6	110458
130	46845935			5481.42	312.842	1.19175	2788.73	0	67270.8	90183.1	91635.7	83468.4	87086.1	110725
4078	46846073			5100.19	288.683	1.14008	3143.73	0	62592.1	83910.9	85262.4	77663.2	81029.3	103024
846	46846143			4974.34	298.989	1.19562	3313.87	0	61047.6	81840.4	83158.6	75746.8	79029.9	100482
4757	46848685			5141.18	272.712	1.07271	2755.79	0	63095.1	84585.3	85947.7	78287.3	81680.5	103852
4767	46848727			4590.75	269.577	1.12214	2728.86	0	56340	75529.3	76745.9	69905.6	72935.5	92733.1
5575	46852477			4930.44	314.149	1.26183	3208.14	0	60508.8	81118	82424.6	75078.2	78332.3	99594.8
5557	46852481			5122.03	349.407	1.37695	3301.68	0	62860.2	84270.3	85627.6	77995.8	81376.3	103465
4085	46852527			4859.82	342.264	1.38471	3241.09	0	59642.2	79956.3	81244.1	74003	77210.5	98168.5
3125	46852537			4949.57	324.533	1.30102	3299.59	0	60743.6	81432.9	82744.5	75369.6	78636.3	99981.4
3147	46852539			4953.51	267.925	1.07365	3229.14	0	60791.9	81497.6	82810.2	75429.5	78698.8	100061
4724	46871625			4553.54	274.645	1.1479	2709.99	0	55883.3	74917.1	76123.8	69339	72344.4	91981.5
4696	46878169			5009.97	263.922	1.05164	2936.13	0	61484.9	82426.6	83754.2	76289.3	79595.9	101201
5748	58224054			5004.33	271.306	1.08167	3541.98	0	61415.7	82333.8	83659.9	76203.5	79506.3	101088
4134	58224164			4504.4	250.391	1.05222	3340.21	0	55280.2	74108.6	75302.3	68590.7	71563.6	90988.8
2500	58224262			5175.01	272.983	1.07025	3376.69	0	63510.4	85141.9	86513.3	78802.5	82218	104535
3307	58224378			4716.65	346.33	1.42227	3430.41	0	57885.1	77600.7	78850.6	71822.8	74935.8	95276.3
3103	58224436			4645.45	257.598	1.06595	3071.5	0	57011.3	76429.2	77660.3	70738.6	73804.5	93838
6021	58224514			5193.01	298.64	1.16882	3315.21	0	63731.2	85437.9	86814.1	79076.5	82503.9	104899
1704	58224526			5486.83	349.567	1.331	3326.68	0	67337.1	90272.1	91726.1	83550.7	87172	110834
6020	58224574			5323.58	315.334	1.21892	3336.77	0	65333.7	87586.2	88997	81064.8	84578.4	107536
3456	58224652			4516.94	294.385	1.23538	3302.04	0	55434.1	74314.9	75511.9	68781.7	71762.9	91242.2
5618	58224756			4739.71	312.71	1.28107	3204.89	0	58168.1	77980	79236.1	72173.9	75302.1	95742.1
3185	58224826			4629.84	344.884	1.42954	3241.47	0	56819.8	76172.5	77399.4	70501	73556.6	93522.8
959	58224858			4640	286.906	1.18792	3127.81	0	56944.4	76339.6	77569.2	70655.6	73718	93727.9
3413	58224926			4791.23	295.074	1.2023	3315.9	0	58800.4	78827.7	80097.4	72958.5	76120.7	96782.9
2536	58225024			5225.49	345.668	1.34866	3265.34	0	64129.9	85972.4	87357.2	79571.2	83020	105555
1781	58225058			4666.04	277.373	1.14524	3423.74	0	57264	76768	78004.5	71052.1	74131.7	94254
6054	58225142			5215.71	262.271	1.02424	3291.8	0	64009.8	85811.5	87193.6	79422.2	82864.6	105357
291	58225238			5118.51	319.514	1.25958	3261.48	0	62816.9	84212.3	85568.7	77942.1	81320.4	103394
275	58225240			5334.69	398.946	1.54052	3256.11	0	65470	87769	89182.7	81234	84754.9	107761
4868	58225260			4874.35	288.554	1.16567	3262.9	0	59820.5	80195.3	81487	74224.2	77441.3	98461.9
2483	58225272			5439.84	273.068	1.0442	3211.59	0	66760.5	89499	90940.6	82835.2	86425.5	109885
4922	58225312			5448.44	293.19	1.12027	3219.74	0	66866	89640.5	91084.3	82966.2	86562.1	110059
4853	58225348			4644.34	305.544	1.2645	3263.73	0	56997.6	76411	77641.7	70721.6	73786.9	93815.6
1699	58225396			4826.21	461.971	1.87551	3265.19	0	59229.7	79403.3	80682.2	73491.1	76676.4	97489.5
443	58225426			5020.96	293.909	1.16984	3243.14	0	61619.7	82607.4	83937.9	76456.7	79770.5	101423
2378	58225438			4832.46	322.045	1.30659	3069.15	0	59306.3	79506	80786.6	73586.2	76775.6	97615.6
1660	58225490			4673.72	254.815	1.05124	3232.33	0	57358.3	76894.4	78133	71169.1	74253.8	94409.2
5488	58225504			4659.75	299.643	1.23803	3119.47	0	57186.8	76664.6	77899.4	70956.4	74031.8	94127
3101	58225542			4600.79	249.964	1.03937	3011.54	0	56463.2	75694.5	76913.7	70058.5	73095	92936
234	58225566			5317.62	373.665	1.44521	3237.58	0	65260.4	87488.1	88897.3	80974	84483.6	107416
3193	58225664			4840.4	259.799	1.05318	3291.92	0	59403.8	79636.7	80919.4	73707.2	76901.9	97776.1
4157	58225666			4666.2	282.525	1.1665	3347.31	0	57265.9	76770.6	78007.2	71054.5	74134.2	94257.2
5569	58225696			4507.36	247.657	1.04039	3120.5	0	55316.6	74157.3	75351.8	68635.8	71610.7	91048.6
5012	58225792			4841.56	273.069	1.10685	3388.57	0	59418.1	79655.8	80938.8	73724.9	76920.3	97799.6
5549	58225886			5457.03	286.215	1.09275	3183.73	0	66971.3	89781.7	91227.8	83096.9	86698.5	110232
2755	58226032			4533.21	258.667	1.08354	3197.83	0	55633.8	74582.6	75783.9	69029.4	72021.3	91570.7
4810	58226034			4925.08	312.997	1.25788	3072.75	0	60443.1	81029.9	82335.1	74996.7	78247.3	99486.7
5568	58226036			4505.96	297.865	1.25151	3042.45	0	55299.4	74134.3	75328.4	68614.5	71588.4	91020.4
5081	58226114			5344.18	364.353	1.40569	3168.7	0	65586.5	87925.2	89341.4	81378.5	84905.7	107952
2453	58226186			5397.68	316.068	1.21335	3043.93	0	66243.1	88805.4	90235.7	82193.2	85755.7	109033
5654	58226346			4930.78	266.573	1.0707	3231.41	0	60513.1	81123.7	82430.4	75083.5	78337.8	99601.9
4890	58226396			4774.78	330.092	1.3473	3241.57	0	58598.5	78557	79822.3	72707.9	75859.3	96450.5
5826	58226446			4873.75	265.635	1.07315	3262.52	0	59813.1	80185.3	81476.9	74215	77431.6	98449.7
5855	58226506			5432.67	484.429	1.85367	3100.64	0	66672.5	89381	90820.7	82726	86311.6	109740
4171	58226546			4936.66	345.609	1.38732	3292.14	0	60585.1	81220.3	82528.5	75172.9	78431.1	99720.4
1599	58226556			4964.73	323.264	1.29395	3144.1	0	60929.7	81682.3	82997.9	75600.5	78877.2	100288
1095	58226576			5117.39	286.144	1.12815	3262.2	0	62803.2	84193.9	85550	77925.1	81302.5	103371
1778	58226624			5322.6	321.683	1.24358	3275.54	0	65321.6	87570	88980.5	81049.8	84562.8	107516
1229	58226702			5194.43	272.269	1.06546	3239.83	0	63748.6	85461.4	86837.9	79098.2	82526.5	104927
3067	58226704			4933.45	275.619	1.10673	2949.89	0	60545.8	81167.6	82475	75124.1	78380.2	99655.7
4995	58226780			4749.22	322.457	1.31968	3227.47	0	58284.8	78136.5	79395	72318.7	75453.2	95934.2
5545	58226822			5146.6	332.219	1.30609	3171.3	0	63161.7	84674.5	86038.3	78369.9	81766.7	103961
5526	58226864			5305.59	317.772	1.23043	3181.51	0	65112.9	87290.3	88696.2	80790.9	84292.6	107173
4311	58226902			4938.93	349.026	1.40071	3145.98	0	60613	81257.7	82566.5	75207.5	78467.2	99766.3
4777	58226920			5053.13	312.589	1.24023	3227.67	0	62014.5	83136.6	84475.7	76946.5	80281.6	102073
924	58226922			4616.85	453.031	1.88045	3036.05	0	56660.3	75958.8	77182.3	70303.2	73350.3	93260.5
2462	58226940			5283.43	312.078	1.21091	3009.05	0	64841	86925.7	88325.8	80453.5	83940.6	106725
4122	58226978			5132.53	265.323	1.04452	2994.81	0	62989	84443	85803.1	78155.6	81543.1	103677
912	58227028			4540.71	294.735	1.23361	3096.13	0	55725.9	74706	75909.3	69143.7	72140.5	91722.4
5005	58227076			5158.69	324.484	1.27418	3071.59	0	63310	84873.3	86240.4	78553.9	81958.7	104205
1733	58227218			4713.1	332.708	1.36684	3226.88	0	57841.6	77542.3	78791.3	71768.8	74879.4	95204.7
3258	58227232			4638.07	272.802	1.12976	3229.44	0	56920.7	76307.8	77536.9	70626.2	73687.3	93689
1007	58227270			4575.54	251.087	1.04691	3153.22	0	56153.3	75279	76491.5	69674	72693.8	92425.8
3393	58227364			5320.06	318.513	1.23162	3191.51	0	65290.5	87528.3	88938.1	81011.3	84522.5	107465
2343	58227382			4855.08	305.555	1.2368	2973.61	0	59584	79878.3	81164.9	73930.8	77135.1	98072.7
417	58227386			5490.86	298.613	1.13657	3194.47	0	67386.5	90338.3	91793.4	83612	87236	110915
284	58227398			5035.31	281.805	1.12006	3083.62	0	61795.9	82843.5	84177.8	76675.2	79998.5	101713
3273	58227464			4613.07	353.042	1.46602	3042.59	0	56614	75896.6	77119.1	70245.6	73290.2	93184.1
6014	58227494			5251.14	348.587	1.35673	2409.42	0	64444.7	86394.5	87786	79961.8	83427.6	106073
2444	58227522			5314.31	312.2	1.20786	3226.74	0	65219.9	87433.7	88842	80923.7	84431.1	107349
176	58227598			4987.89	264.275	1.05537	3202.35	0	61213.9	82063.3	83385.1	75953.1	79245.1	100755
4506	58227600			5263.45	337.727	1.31292	3090.3	0	64595.6	86596.8	87991.6	80149.1	83623	106322
341	58227670			5075.07	339.535	1.34422	3016.13	0	62283.7	83497.5	84842.4	77280.6	80630.1	102516
1895	58228000			5281.23	321.344	1.24713	2838.65	0	64813.9	86889.5	88289	80420	83905.6	106681
3473	58228076			4941.4	287.504	1.15352	2254.01	0	60643.4	81298.4	82607.9	75245.2	78506.5	99816.3
5053	58228226			4908.14	333.431	1.34232	2728.28	0	60235.1	80751.1	82051.8	74738.7	77978	99144.4
4976	58228504			5488.64	409.557	1.55915	2304.13	0	67359.4	90301.9	91756.4	83578.3	87200.8	110871
3	58228570			4870.9	324.73	1.31228	2778.79	0	59778.2	80138.5	81429.3	74171.7	77386.5	98392.3
1146	72130609			4808.78	296.357	1.20533	2741.41	0	59015.8	79116.5	80390.8	73225.7	76399.5	97137.4
0	72137281			4596.03	260.549	1.08394	2933.62	0	56404.7	75616.1	76834.1	69986	73019.4	92839.7
2	72137291			5282.31	293.687	1.13967	2777.04	0	64827.1	86907.2	88307	80436.3	83922.7	106703
788	72147709			5377.72	292.085	1.12336	2638.88	0	65998.1	88477	89902.1	81889.3	85438.5	108630
5415	72150727			5494.97	336.263	1.27939	2366.16	0	67437.1	90406.1	91862.2	83674.7	87301.4	110998
3428	75276519			5275.31	385.9	1.4985	3128.95	0	64741.2	86792	88190	80329.8	83811.5	106561
2704	75276661			5402.08	271.358	1.04128	3204.62	0	66297.1	88877.8	90309.4	82260.2	85825.6	109122
1882	75276937			4655.32	500.351	2.06827	2742.3	0	57132.4	76591.7	77825.3	70888.9	73961.4	94037.5
3891	75277103			5238.76	306.433	1.19407	2755.28	0	64292.7	86190.8	87579	79773.3	83230.9	105823
5944	75277155			4900.44	274.923	1.10765	2773.82	0	60140.6	80624.4	81923	74621.4	77855.7	98988.8
3861	75277173			4658.61	384.872	1.59036	2787.3	0	57172.8	76645.8	77880.3	70939	74013.7	94103.9
4333	75277303			5143.75	297.975	1.17178	2997.98	0	63126.7	84627.6	85990.7	78326.5	81721.4	103904
5853	75279963			4842.98	345.31	1.39946	2844.38	0	59435.5	79679.1	80962.5	73746.5	76942.8	97828.2
1955	75280173			4887.56	311.234	1.25559	2814.02	0	59982.5	80412.5	81707.7	74425.3	77651.1	98728.7
1933	75280181			4799.18	366.342	1.49146	2863	0	58897.9	78958.5	80230.2	73079.5	76246.9	96943.4
3375	75283671			5303.22	304.212	1.17819	3495.85	0	65083.7	87251.2	88656.5	80754.7	84254.9	107125
1127	75283719			4529.93	343.804	1.4407	3241.83	0	55593.6	74528.8	75729.2	68979.6	71969.3	91504.7
5261	75284149			5164.78	419.48	1.64624	3117.71	0	63384.8	84973.6	86342.3	78646.7	82055.5	104329
1267	75294037			5495.57	301.325	1.1464	3022.65	0	67444.3	90415.8	91872.1	83683.7	87310.8	111010
4510	75294171			5481.54	340.398	1.29671	2889.42	0	67272.3	90185.1	91637.7	83470.2	87088	110727
2086	75294379			4684.41	266.762	1.09927	2887.24	0	57489.4	77070.2	78311.6	71331.8	74423.5	94625
3620	75294525			4729.46	411.084	1.6859	2854.46	0	58042.3	77811.5	79064.8	72017.9	75139.3	95535.1
4559	75294605			4919.58	277.24	1.11481	2935.6	0	60375.5	80939.4	82243.1	74912.9	78159.8	99375.5
2098	75294693			4570.36	419.297	1.74926	2858.83	0	56089.7	75193.8	76405	69595.2	72611.6	92321.3
6091	75294859			5470.62	326.7	1.24577	3213.17	0	67138.2	90005.4	91455.1	83303.9	86914.5	110507
3567	75298823			4522.64	445.438	1.86809	2853.77	0	55504.1	74408.7	75607.2	68868.4	71853.4	91357.3
5199	75298853			5371.7	349.497	1.34492	2944.66	0	65924.2	88377.9	89801.4	81797.6	85342.9	108508
3746	82733549			5453.22	288.797	1.103	3117.45	0	66924.6	89719	91164.1	83038.8	86638	110155
5476	82733569			4860.63	286.216	1.15786	3169.24	0	59652	79969.4	81257.5	74015.2	77223.2	98184.6
4672	82733691			4527.36	260.324	1.09119	3019.02	0	55562	74486.3	75686.1	68940.3	71928.4	91452.6
5409	82733751			4874.49	251.115	1.01441	2960.84	0	59822.2	80197.5	81489.3	74226.3	77443.5	98464.7
1488	82733903			5377.87	351.518	1.35192	2936.19	0	65999.9	88479.4	89904.5	81891.5	85440.9	108633
4275	82734601			4861.76	280.301	1.1338	2656.02	0	59666	79988.1	81276.5	74032.5	77241.3	98207.6
2562	35205272			4928.9	268.266	1.0777	2906.08	0	60489.9	81092.7	82398.8	75054.8	78307.8	99563.7
2296	72130173			4887.68	304.885	1.22996	3043.06	0	59984.1	80414.6	81709.9	74427.2	77653.1	98731.2
3034	72140263			4833.59	348.58	1.41409	3150.8	0	59320.2	79524.6	80805.5	73603.5	76793.6	97638.5
2982	72130175			3915.44	275.052	1.23974	3047.31	0	48052.2	64418.7	65456.3	59622.3	62206.5	79091.8
5414	72130307			4633.34	328.349	1.36049	3102.9	0	56862.7	76230.1	77457.9	70554.2	73612.2	93593.5
16	72130179			4406.36	328.337	1.39504	3045.98	0	54077	72495.6	73663.3	67097.8	70006	89008.4
32	72155329			4112.43	254.923	1.12116	2424.86	0	50469.8	67659.8	68749.5	62622	65336.2	83071.1
4684	72140215			4098.04	236.636	1.04256	3094.88	0	50293.2	67423	68509	62402.9	65107.6	82780.4
3915	35180702			3738.02	243.713	1.12426	2857.05	0	45874.9	61499.8	62490.4	56920.7	59387.8	75508.1
3361	35181014			3650.24	322.404	1.50504	2877.85	0	44797.5	60055.5	61022.8	55584	57993.1	73734.8
3365	35181098			3738.24	224.272	1.03455	2991.11	0	45877.6	61503.4	62494	56924.1	59391.3	75512.5
6316	35182232			4483.04	302.027	1.27223	2663.03	0	55018.2	73757.3	74945.3	68265.6	71224.4	90557.5
5959	35182266			2974.97	271.225	1.40248	2729.71	0	36510.3	48945.6	49734	45301.3	47264.8	60094.3
3770	35182288			3680.63	237.522	1.10421	2724.01	0	45170.5	60555.6	61531	56046.8	58476	74348.8
6260	35182308			3672.14	252.886	1.17699	2712.85	0	45066.3	60415.9	61389	55917.5	58341.1	74177.2
3786	35182314			3741.19	304.132	1.40238	2712.73	0	45913.7	61551.9	62543.3	56968.9	59438.1	75572
3850	35193848			3782.02	387.64	1.77777	2930.56	0	46414.8	62223.7	63225.9	57590.7	60086.8	76396.8
5870	35204944			4350.34	286.216	1.22388	2772.52	0	53389.6	71574	72726.8	66244.8	69116.1	87876.9
2547	35205028			4035.81	308.293	1.36869	2773.73	0	49529.4	66399.1	67468.6	61455.2	64118.9	81523.3
5688	35205056			3850.31	295.626	1.3437	2784.27	0	47252.9	63347.2	64367.5	58630.5	61171.7	77776.2
4180	35205058			3937.7	275.401	1.2378	2895.44	0	48325.4	64785	65828.5	59961.3	62560.2	79541.5
4177	35205104			4193.76	286.15	1.24623	2874.48	0	51467.9	68997.9	70109.2	63860.5	66628.4	84714
4927	35205236			4438.37	324.099	1.37206	2779	0	54469.9	73022.3	74198.5	67585.3	70514.7	89655.2
4191	35205286			3696.92	330.617	1.5336	2913.07	0	45370.4	60823.6	61803.3	56294.8	58734.8	74677.8
4932	35209462			3795.62	305.832	1.40007	2874.23	0	46581.8	62447.5	63453.3	57797.9	60303	76671.6
4202	35209522			3765.43	269.001	1.23639	3192.89	0	46211.3	61950.8	62948.6	57338.1	59823.3	76061.7
261	35209524			3794.38	237.806	1.08883	3351.24	0	46566.5	62427	63432.6	57778.9	60283.2	76646.5
2541	35209544			4361.4	241.069	1.02952	3342.05	0	53525.3	71756	72911.8	66413.3	69291.8	88100.4
276	35209596			4437.29	277.524	1.17503	3267.26	0	54456.6	73004.5	74180.4	67568.8	70497.4	89633.2
3297	35209686			3875.49	341.66	1.54789	3474.07	0	47562	63761.6	64788.6	59014.1	61571.9	78285
3345	35210546			4350.45	303.821	1.29915	3338.46	0	53390.9	71575.8	72728.7	66246.5	69117.8	87879.1
4257	35210646			3510.76	233.121	1.10966	3342.27	0	43085.8	57760.8	58691.1	53460.1	55777.2	70917.3
346	35210756			4260.35	251.625	1.08727	3421.31	0	52285.2	70093.4	71222.4	64874.5	67686.3	86059.1
4256	35210758			3545.85	231.506	1.0965	3411.2	0	43516.5	58338.1	59277.8	53994.5	56334.7	71626.2
338	35210778			4008.89	282.154	1.25685	3443.93	0	49199.1	65956.3	67018.6	61045.4	63691.2	80979.6
4856	35219198			4097.49	325.048	1.43217	3254.47	0	50286.4	67414	68499.8	62394.5	65098.9	82769.3
5631	35219244			3637.35	242.93	1.13605	3361.05	0	44639.3	59843.4	60807.3	55387.7	57788.3	73474.4
6007	35227614			4044.33	327.083	1.45058	2786.46	0	49634	66539.3	67611	61585	64254.3	81695.4
6159	40035467			3997.81	282.225	1.2589	3341.38	0	49063.2	65774	66833.4	60876.7	63515.3	80755.8
3687	40035637			4478.77	248.214	1.04606	2970.04	0	54965.7	73687	74873.9	68200.5	71156.5	90471.2
6220	40035747			3511.82	348.046	1.65645	2946.09	0	43098.8	57778.2	58708.8	53476.2	55794	70938.7
2938	40035897			3888.71	256.953	1.16214	2938.77	0	47724.2	63979	65009.5	59215.4	61781.9	78552
3669	40035903			4211.95	416.134	1.80842	2987.19	0	51691.2	69297.2	70413.3	64137.5	66917.4	85081.5
4613	40036011			4460.64	261.044	1.10236	2922.77	0	54743.2	73388.6	74570.7	67924.3	70868.4	90104.9
710	40036021			3850.09	276.041	1.25472	2918.71	0	47250.2	63343.6	64363.9	58627.2	61168.3	77771.8
5370	40036041			3852.88	306.528	1.39279	2911.4	0	47284.5	63389.5	64410.5	58669.7	61212.6	77828.2
4566	40036115			4201.48	311.248	1.35429	3092.71	0	51562.7	69124.9	70238.2	63978	66751	84869.9
6245	40036351			3728.41	340.844	1.57435	2898.19	0	45757	61341.7	62329.8	56774.4	59235.2	75314
6208	40036429			4251.87	290.622	1.25703	2943.83	0	52181.1	69953.9	71080.6	64745.3	67551.6	85887.8
5342	40036467			3508.05	280.779	1.33703	2947.54	0	43052.5	57716.1	58645.8	53418.8	55734.1	70862.6
1456	40036491			3859.48	412.734	1.87376	2871.96	0	47365.5	63498.1	64520.9	58770.2	61317.5	77961.5
1455	40036579			4295.2	399.225	1.71804	2872.34	0	52712.9	70666.8	71805	65405.2	68240	86763.1
1418	40036663			4215	257.887	1.12031	2959.05	0	51728.6	69347.3	70464.3	64183.9	66965.8	85143
3665	40036795			3554.86	219.023	1.03606	2985.46	0	43627	58486.4	59428.4	54131.7	56477.9	71808.2
1390	40036797			3840.95	303.162	1.37963	3033.8	0	47138.1	63193.3	64211.1	58488.1	61023.1	77587.2
3684	40036805			4472.84	292.291	1.23263	2939.7	0	54892.9	73589.3	74774.6	68110.1	71062.2	90351.3
5315	40036911			3923.31	252.401	1.13651	3054.19	0	48148.9	64548.3	65588	59742.3	62331.7	79250.9
1374	40036913			3612.68	270.378	1.26872	3044.58	0	44336.6	59437.6	60394.9	55012.1	57396.4	72976.1
2923	40036943			3572.73	263.194	1.24189	2962.31	0	43846.3	58780.3	59727.1	54403.7	56761.7	72169.1
1437	40036961			3498.28	249.424	1.18937	2920.39	0	42932.7	57555.5	58482.5	53270.1	55578.9	70665.3
5316	40036979			2057.54	316.67	1.96897	3041.14	0	25251.2	33851.7	34397	31331.2	32689.2	41562.4
2916	40037067			3795.5	253.094	1.15866	2945.43	0	46580.2	62445.4	63451.2	57795.9	60300.9	76669
1430	40037141			4286.65	395.104	1.702	2890.27	0	52608	70526.2	71662.1	65275	68104.2	86590.4
2138	40037215			4341.58	290.646	1.24408	3108.32	0	53282.1	71429.9	72580.4	66111.4	68976.9	87700
2105	40037247			4218.43	250.029	1.08573	3046.06	0	51770.6	69403.7	70521.5	64236.1	67020.3	85212.2
2406	46845707			3813.51	234.191	1.06959	2738.01	0	46801.3	62741.8	63752.3	58070.2	60587.1	77032.9
851	46845709			3777.79	299.767	1.37554	2732.65	0	46363	62154.2	63155.3	57526.4	60019.7	76311.4
204	46845763			4228.63	333.557	1.4467	2691.81	0	51895.8	69571.5	70692.1	64391.4	67182.3	85418.3
4754	46845817			4082.84	233.546	1.03086	2793.92	0	50106.6	67172.9	68254.9	62171.4	64866.1	82473.4
134	46845855			4493.56	345.961	1.45559	2827.51	0	55147.2	73930.3	75121.1	68425.7	71391.4	90769.9
4805	46845905			3871.72	248.812	1.12779	2680.04	0	47515.7	63699.5	64725.5	58956.6	61511.9	78208.7
3109	46845997			4168.21	303.167	1.32439	2755.4	0	51154.4	68577.5	69682.1	63471.4	66222.4	84197.9
908	46846019			4133.77	239.366	1.05002	2900.02	0	50731.7	68010.9	69106.3	62947	65675.3	83502.2
5596	46846103			3579.59	224.203	1.0569	3067.02	0	43930.5	58893.2	59841.8	54508.2	56870.7	72307.7
4786	46848487			3506.03	220.074	1.04826	2572.62	0	43027.8	57683	58612.1	53388.1	55702.1	70821.9
4785	46848527			3940.15	230.457	1.03548	2596.8	0	48355.5	64825.3	65869.4	59998.6	62599.1	79591
5523	46848683			3627.17	279.23	1.30763	2702.01	0	44514.5	59676	60637.2	55232.7	57626.7	73268.9
3116	46848689			3497.29	246.465	1.17543	2719.24	0	42920.5	57539.2	58466	53255	55563.2	70645.3
853	46848705			3702.8	225.416	1.04479	2737.19	0	45442.7	60920.4	61901.6	56384.4	58828.3	74796.6
169	46852519			4391.58	270.511	1.15128	3290.19	0	53895.7	72252.5	73416.2	66872.8	69771.2	88709.9
3088	46858671			3974.41	285.565	1.27754	3174.34	0	48775.9	65388.9	66442.1	60520.3	63143.4	80283
2388	46858689			4265.13	258.026	1.11431	3147.48	0	52343.8	70172	71302.3	64947.2	67762.2	86155.6
970	46867083			4336.75	276.277	1.18323	2897.13	0	53222.8	71350.4	72499.7	66037.9	68900.2	87602.4
222	46867141			4381.86	277.28	1.1814	3305.17	0	53776.4	72092.6	73253.8	66724.8	69616.9	88513.7
4712	46871727			4053.86	412.136	1.82563	2793.44	0	49751	66696.2	67770.4	61730.2	64405.7	81888
5455	46878091			3639.76	291.656	1.36346	2838.56	0	44669	59883.2	60847.8	55424.5	57826.8	73523.2
2362	46878197			3682.43	249.487	1.15955	2791.04	0	45192.6	60585.2	61561	56074.2	58504.6	74385.1
1534	46878233			3823.81	291.155	1.32796	2864.77	0	46927.7	62911.2	63924.5	58227.1	60750.8	77240.9
4735	46878311			3919.91	250.076	1.12653	2985.52	0	48107	64492.2	65531	59690.4	62277.5	79182.1
1900	58223898			4480.81	251.478	1.05957	3484.63	0	54990.8	73720.6	74908	68231.6	71188.9	90512.5
5026	58223902			4221.66	243.782	1.0582	3616.53	0	51810.4	69456.9	70575.6	64285.4	67071.7	85277.6
1070	58223982			3722.88	242.695	1.12183	3622.73	0	45689	61250.7	62237.2	56690.2	59147.3	75202.2
1942	58224008			3595.57	232.669	1.09436	3386.4	0	44126.6	59156.1	60108.9	54751.5	57124.6	72630.5
1969	58224046			3785.31	239.455	1.09769	3423.17	0	46455.2	62277.8	63280.9	57640.8	60139.1	76463.3
1959	58224050			3921.51	261.636	1.17836	3408.77	0	48126.7	64518.6	65557.8	59714.7	62302.9	79214.4
3459	58224134			3845.8	280.818	1.27714	3402.83	0	47197.6	63273	64292.2	58561.9	61100.2	77685.2
3306	58224154			3684.59	304.186	1.41336	3522.42	0	45219.1	60620.7	61597.1	56107.1	58538.9	74428.7
325	58224400			4291.67	258.939	1.11479	3427.27	0	52669.5	70608.7	71746	65351.4	68183.9	86691.7
6032	58224404			4488.07	277.139	1.16675	3348.76	0	55079.8	73839.9	75029.3	68342.1	71304.2	90659
4830	58224446			3611.27	273.754	1.28481	3252.93	0	44319.3	59414.4	60371.4	54990.6	57374	72947.6
4128	58224462			3786.56	241.553	1.10713	3321.31	0	46470.5	62298.4	63301.8	57659.8	60158.9	76488.5
478	58224474			3728.22	229.05	1.058	3250.47	0	45754.6	61338.6	62326.5	56771.5	59232.1	75310.1
149	58224492			3941.5	228.325	1.02572	3176.1	0	48372	64847.5	65892	60019.2	62620.6	79618.3
1958	58224724			4416.33	271.22	1.15106	3252.37	0	54199.4	72659.6	73830	67249.6	70164.4	89209.8
1828	58224798			4028.77	261.717	1.16293	3265.78	0	49443.1	66283.4	67351	61348.2	64007.1	81381.2
3349	58224806			3639.15	237.339	1.10962	3422.48	0	44661.4	59873.1	60837.5	55415.1	57817	73510.8
4031	58224900			3575.37	238.609	1.12547	3176.08	0	43878.7	58823.7	59771.2	54443.9	56803.6	72222.4
5175	58225006			3594.19	238.206	1.12062	3228.9	0	44109.6	59133.3	60085.8	54730.5	57102.6	72602.6
2576	58225016			3744.99	245.895	1.13326	3513.38	0	45960.4	61614.5	62606.9	57026.9	59498.6	75648.9
5828	58225030			4481.05	260.601	1.09798	3346.29	0	54993.6	73724.4	74911.9	68235.1	71192.6	90517.1
940	58225102			4307.79	240.71	1.03437	3309.34	0	52867.3	70873.9	72015.4	65596.8	68440	87017.3
1012	58225156			3740.38	272.382	1.25611	3275.34	0	45903.9	61538.7	62529.9	56956.7	59425.4	75555.8
4854	58225168			4239.25	305.935	1.32524	3243	0	52026.2	69746.2	70869.6	64553.2	67351.1	85632.8
257	58225220			3898.53	241.331	1.09011	3384.16	0	47844.7	64140.6	65173.7	59364.9	61937.9	78750.3
1873	58225306			3655.67	236.42	1.10283	3376.02	0	44864.2	60144.9	61113.6	55666.7	58079.4	73844.5
5489	58225380			3555.31	249.767	1.18142	3133.71	0	43632.6	58493.8	59436	54138.5	56485	71817.3
5494	58225390			4182.37	295.119	1.28704	3072.55	0	51328.1	68810.4	69918.8	63687	66447.4	84483.9
4387	58225462			3927.76	296.212	1.33302	3179.27	0	48203.5	64621.5	65662.4	59810	62402.4	79340.8
5648	58225480			4346.3	302.047	1.29218	3427.35	0	53340	71507.5	72659.3	66183.3	69051.8	87795.3
1745	58225502			4288.43	273.468	1.17778	3202.22	0	52629.8	70555.4	71691.8	65302.1	68132.4	86626.3
4350	58225540			4224.52	281.005	1.21937	3315.02	0	51845.4	69503.9	70623.4	64328.8	67117	85335.2
1672	58225632			3683.85	253.378	1.17741	3325.56	0	45210	60608.5	61584.7	56095.8	58527.1	74413.7
1647	58225684			3701.02	226.523	1.05017	3133.02	0	45420.7	60891	61871.7	56357.2	58799.9	74760.5
4959	58225706			3995.53	259.649	1.15853	3352.92	0	49035.1	65736.4	66795.3	60841.9	63479	80709.7
5788	58225802			3683.18	271.647	1.26241	3422.5	0	45201.8	60597.5	61573.5	56085.6	58516.5	74400.2
1850	58225806			3692.01	276.927	1.28541	3383.36	0	45310.2	60742.8	61721.1	56220.1	58656.8	74578.6
322	58225902			3801.71	370.592	1.69517	3321.9	0	46656.5	62547.7	63555.1	57890.6	60399.7	76794.6
5794	58225906			4302.34	242.506	1.04274	3426.48	0	52800.4	70784.2	71924.3	65513.9	68353.4	86907.2
939	58225932			3723.67	249.991	1.15544	3250.61	0	45698.7	61263.6	62250.4	56702.1	59159.8	75218.1
3435	58226024			3641.5	229.624	1.07321	3108.33	0	44690.3	59911.8	60876.8	55451	57854.4	73558.4
4137	58226026			3644.6	295.592	1.38094	3169.07	0	44728.4	59962.9	60928.7	55498.2	57903.7	73621
902	58226044			3707.65	230.166	1.0661	3040.43	0	45502.1	61000.1	61982.6	56458.2	58905.3	74894.5
5579	58226050			3968.92	237.578	1.0636	3068.97	0	48708.6	65298.7	66350.5	60436.8	63056.3	80172.3
5635	58226080			3729.9	264.065	1.21947	3218.63	0	45775.2	61366.2	62354.6	56797	59258.8	75343.9
4903	58226106			4164.44	303.735	1.32747	3303.07	0	51108.1	68515.5	69619	63414	66162.6	84121.7
333	58226128			3581.97	228.89	1.07863	3277.56	0	43959.8	58932.4	59881.6	54544.5	56908.6	72355.9
4930	58226132			4263.13	320.348	1.38378	3276.95	0	52319.3	70139.2	71268.9	64916.9	67730.5	86115.3
5787	58226170			3580.9	260.528	1.22791	3302.45	0	43946.6	58914.8	59863.7	54528.2	56891.5	72334.2
1825	58226252			4431.25	368.678	1.56204	3294.97	0	54382.5	72905.1	74079.4	67476.8	70401.5	89511.2
1826	58226260			3587.38	234.445	1.10397	3288.15	0	44026.1	59021.4	59972	54626.8	56994.5	72465.1
2552	58226300			3694.45	279.629	1.29752	3200.67	0	45340.1	60782.9	61761.9	56257.2	58695.5	74627.8
4092	58226310			4027.24	233.367	1.03716	3140.55	0	49424.3	66258.2	67325.4	61324.8	63982.8	81350.3
385	58226370			4330.11	282.668	1.21153	3314.18	0	53141.2	71241.1	72388.5	65936.7	68794.5	87468.1
5055	58226414			4154.94	277.02	1.21209	3299.77	0	50991.5	68359.2	69460.3	63269.4	66011.7	83929.9
5691	58226478			4477.88	261.466	1.10201	3117.4	0	54954.8	73672.3	74859	68186.9	71142.3	90453.2
4073	58226536			4138.56	240.272	1.05338	3156.49	0	50790.4	68089.6	69186.3	63019.9	65751.3	83598.8
318	58226654			3925.97	307.97	1.38625	3288.95	0	48181.5	64592.1	65632.5	59782.8	62373.9	79304.7
329	58226732			3856.22	265.204	1.2045	3293.27	0	47325.4	63444.4	64466.3	58720.5	61265.6	77895.6
2413	58226762			3858.4	367.104	1.66684	3205.3	0	47352.3	63480.4	64502.9	58753.8	61300.4	77939.8
1710	58226774			3857.36	242.052	1.09919	3070.88	0	47339.4	63463.2	64485.4	58737.9	61283.8	77918.6
4164	58226792			3585.98	305.472	1.43872	3241.75	0	44009	58998.4	59948.6	54605.5	56972.3	72436.8
3330	58226838			3715.19	316.019	1.46228	3145.42	0	45594.7	61124.2	62108.7	56573.1	59025.1	75046.9
2006	58226870			4456.02	267.342	1.12954	3231.41	0	54686.5	73312.6	74493.5	67854	70795	90011.6
2762	58226906			4334.63	319.295	1.3678	3180.21	0	53196.8	71315.6	72464.3	66005.7	68866.5	87559.6
2459	58227030			3790.52	267.32	1.22459	3095.41	0	46519.1	62363.5	63368	57720.1	60221.8	76568.4
70	58227122			3561.27	226.197	1.06904	2985.09	0	43705.7	58591.8	59535.5	54229.2	56579.7	71937.7
4915	58227166			3643.33	252.341	1.17909	3158.42	0	44712.7	59941.9	60907.3	55478.8	57883.4	73595.2
2551	58227208			4426.43	268.273	1.13725	3122	0	54323.3	72825.8	73998.8	67403.4	70324.9	89413.8
1076	58227210			3807.76	254.656	1.16393	2996.66	0	46730.8	62647.3	63656.3	57982.7	60495.9	76916.9
5675	58227242			4320.28	251.209	1.07792	3153.26	0	53020.7	71079.5	72224.4	65787.1	68638.5	87269.7
1717	58227244			3812.36	274.493	1.25384	3229.63	0	46787.2	62722.9	63733.2	58052.8	60568.9	77009.8
62	58227336			3983.83	297.471	1.32924	2986.5	0	48891.5	65543.9	66599.6	60663.7	63293	80473.3
2342	58227358			3784.74	246.402	1.12962	2973.69	0	46448.2	62268.4	63271.4	57632.1	60130.1	76451.8
5615	58227394			3673.62	262.742	1.22262	3104.08	0	45084.5	60440.2	61413.7	55940.1	58364.6	74207.1
600	58227604			4109.34	267.13	1.17529	3093.64	0	50431.8	67608.9	68697.8	62574.9	65287.1	83008.6
5040	58227650			4202.66	311.531	1.35533	3058.04	0	51577.1	69144.2	70257.9	63996	66769.7	84893.7
1966	58227664			3885.39	291.491	1.31891	2352.31	0	47683.4	63924.3	64954	59164.7	61729.1	78484.8
5422	58228028			4107.35	249.171	1.09654	2825.14	0	50407.4	67576.1	68664.6	62544.6	65255.5	82968.4
5831	58228058			3785.06	282.991	1.29731	2824.04	0	46452.2	62273.8	63276.8	57637.1	60135.2	76458.3
2737	58228084			3786.61	273.135	1.25187	2253.06	0	46471.2	62299.2	63302.7	57660.6	60159.8	76489.5
1894	58228158			4197.28	264.63	1.15203	2769.08	0	51511.2	69055.8	70168.1	63914.1	66684.3	84785.1
1218	58228344			4446.92	310.104	1.31155	2207.38	0	54574.9	73163	74341.4	67715.5	70650.5	89827.8
5746	58228436			3540.97	415.434	1.96901	2302.08	0	43456.5	58257.8	59196.2	53920.1	56257.2	71527.6
1743	58228528			3845.96	264.28	1.2019	2215.28	0	47199.5	63275.6	64294.8	58564.3	61102.6	77688.3
5019	58228632			4056.22	260.091	1.15179	2299.89	0	49780	66735	67809.9	61766.2	64443.3	81935.7
5103	58228770			4487.73	282.554	1.18959	2887.4	0	55075.7	73834.4	75023.6	68336.9	71298.8	90652.1
2279	58228802			3577.78	248.754	1.17293	2713.17	0	43908.3	58863.5	59811.6	54480.7	56842	72271.2
4663	58228914			4481.1	459.103	1.93431	2896.3	0	54994.3	73725.3	74912.8	68236	71193.5	90518.3
1471	58228916			3573.18	281.998	1.33054	2909.28	0	43851.8	58787.7	59734.6	54410.6	56768.9	72178.2
4658	72130259			4190.6	256.265	1.1165	2913.38	0	51429.1	68945.8	70056.3	63812.3	66578.1	84650
4655	72130531			3512.32	270.005	1.28494	3058.76	0	43105	57786.5	58717.3	53483.9	55802	70948.9
5694	72137279			4142.26	246.963	1.08223	2826.71	0	50835.9	68150.6	69248.3	63076.3	65810.2	83673.7
869	72137289			4334.38	319.918	1.37051	2959.85	0	53193.7	71311.5	72460.1	66001.8	68862.5	87554.6
2977	72137301			4438.35	280.203	1.18623	2938.86	0	54469.6	73021.9	74198.1	67584.9	70514.3	89654.6
3070	72140401			3560.59	229.576	1.08511	3143.61	0	43697.4	58580.7	59524.2	54218.9	56568.9	71924
28	72150689			3936.04	263.832	1.18606	3122.12	0	48305.1	64757.7	65800.8	59936.1	62533.8	79508
3756	72150701			3810.97	293.364	1.34028	2516.79	0	46770.2	62700	63709.9	58031.6	60546.8	76981.6
53	72155249			3938.8	297.294	1.33602	2970.76	0	48338.9	64803.1	65846.9	59978.1	62577.7	79563.7
3765	72155287			3632.9	230.024	1.07635	2424.9	0	44584.8	59770.4	60733.1	55320.1	57717.8	73384.7
515	75273191			3902.15	299.803	1.35361	3204.45	0	47889.2	64200.2	65234.2	59420	61995.4	78823.5
5179	75273197			3573.98	300.856	1.41935	3096.18	0	43861.7	58800.9	59748	54422.8	56781.6	72194.4
4406	75276629			4043.16	247.951	1.0998	3301.74	0	49619.6	66520	67591.5	61567.2	64235.6	81671.7
1970	75276695			4120.79	257.205	1.13005	3302.23	0	50572.4	67797.3	68889.3	62749.3	65469	83239.9
5111	75276747			4239.37	243.604	1.05521	3398.52	0	52027.7	69748.3	70871.7	64555	67353	85635.3
480	75276751			3945.19	345.347	1.55071	3312.98	0	48417.4	64908.3	65953.7	60075.4	62679.2	79692.9
5950	75277021			4398.14	280.362	1.19232	2717.74	0	53976.2	72360.4	73525.9	66972.7	69875.4	88842.4
3962	75277169			4371.36	276.576	1.17982	2791.93	0	53647.5	71919.7	73078.1	66564.8	69449.9	88301.4
3820	75277171			3792.68	266.411	1.22008	2719.46	0	46545.7	62399	63404.1	57753	60256.2	76612.1
3856	75277233			4052.88	236.421	1.0474	2828.81	0	49739	66680	67754	61715.2	64390.1	81868.2
407	75277255			3962.81	245.082	1.09804	2829.78	0	48633.6	65198.2	66248.4	60343.8	62959.2	80048.9
4334	75277265			3665.4	293.133	1.36556	2853.32	0	44983.6	60305	61276.3	55814.9	58234	74041.1
406	75277287			3778.98	258.148	1.18438	2882.37	0	46377.6	62173.7	63175.2	57544.5	60038.6	76335.5
4361	75277377			3582.77	350.219	1.6502	2963.24	0	43969.6	58945.6	59895	54556.7	56921.3	72372.1
3449	75279977			616.445	110.226	1.25211	2870.69	0	7565.32	10142.1	10305.4	9386.92	9793.77	12452.2
6009	75279993			4295.03	308.677	1.3284	2839.61	0	52710.8	70664	71802.2	65402.6	68237.3	86759.7
2698	75280141			3748.8	247.117	1.13832	2846.85	0	46007.1	61677.1	62670.5	57084.8	59559	75725.7
3454	75280191			3559.13	250.291	1.18326	2833.16	0	43679.4	58556.6	59499.8	54196.7	56545.7	71894.4
4399	75280253			4069.7	335.126	1.48161	2844.77	0	49945.4	66956.7	68035.2	61971.3	64657.3	82207.9
3445	75280309			4155.19	300.92	1.31663	2899.49	0	50994.6	68363.3	69464.4	63273.2	66015.6	83934.8
3396	75283705			4321.78	275.963	1.18393	3201.73	0	53039.1	71104.1	72249.4	65809.9	68662.3	87300
1877	75283747			4006.7	239.136	1.06551	3316.43	0	49172.3	65920.3	66982.1	61012.1	63656.5	80935.4
2651	75283791			3769.58	225.085	1.03397	3407.72	0	46262.2	62019	63017.9	57401.3	59889.2	76145.5
5279	75283939			3586.93	233.548	1.09982	2847.14	0	44020.6	59014	59964.5	54620	56987.4	72456
3598	75283959			4148.14	311.133	1.36247	2890.84	0	50908.1	68247.3	69346.6	63165.8	65903.6	83792.5
2878	75284019			3635.67	232.888	1.08934	2871.08	0	44618.7	59815.8	60779.2	55362.1	57761.6	73440.4
5282	75284023			4180.52	293.061	1.27835	2888.68	0	51305.5	68780.1	69887.9	63658.9	66418.1	84446.6
4308	75288929			3650.78	260.128	1.21423	3496.31	0	44804.2	60064.5	61032	55592.3	58001.8	73745.8
4299	75288961			3623.23	242.396	1.13576	3420.28	0	44466.1	59611.2	60571.4	55172.7	57564.1	73189.3
561	75289289			3819.99	258.626	1.18018	2950.15	0	46880.8	62848.3	63860.6	58168.8	60690	77163.7
1311	75289381			4049.88	262.768	1.16455	2799.86	0	49702.1	66630.6	67703.9	61669.5	64342.5	81807.6
2062	75289477			3816.43	248.697	1.1354	2900.77	0	46837.1	62789.8	63801.1	58114.6	60633.5	77091.8
4516	75294021			4399.17	345.58	1.4695	2863.53	0	53988.8	72377.4	73543.2	66988.4	69891.9	88863.3
631	75294285			4492.24	382.398	1.60913	2853.37	0	55131	73908.6	75099.1	68405.6	71370.5	90743.3
5284	75294545			4458.42	264.094	1.11551	2882.11	0	54716	73352.2	74533.7	67890.6	70833.2	90060.1
2154	75294547			4065.23	243.553	1.07736	2857.8	0	49890.5	66883.2	67960.5	61903.3	64586.4	82117.7
2038	75294553			3711.42	232.155	1.07477	3278.72	0	45548.4	61062.2	62045.7	56515.7	58965.2	74970.7
5216	75294771			3782.59	226.331	1.03791	3275.95	0	46421.9	62233.1	63235.5	57599.4	60096	76408.4
2790	75298807			4195.25	333.93	1.45406	2986.48	0	51486.2	69022.3	70134	63883.1	66652	84744
5813	75298829			3941.56	245.003	1.10064	3172.49	0	48372.8	64848.6	65893.1	60020.2	62621.6	79619.6
2823	75298835			3719.27	315.991	1.46135	2877.08	0	45644.8	61191.3	62176.9	56635.2	59089.9	75129.3
2337	82733485			4309.56	265.623	1.14119	3107.34	0	52889.1	70903.1	72045.1	65623.9	68468.2	87053.2
810	82733511			4348.39	393.028	1.681	3219.83	0	53365.6	71541.8	72694.1	66215.1	69085	87837.4
90	82733533			4494.71	286.021	1.20325	3194.38	0	55161.3	73949.2	75140.3	68443.2	71409.7	90793.1
12	82733561			3614.34	250.665	1.17594	3117.75	0	44357	59465	60422.8	55037.4	57422.9	73009.7
2304	82733593			4088.84	250.504	1.1049	3105.91	0	50180.3	67271.6	68355.2	62262.8	64961.4	82594.6
3743	82733707			3882.25	264.15	1.19569	3096.45	0	47644.9	63872.7	64901.5	59117	61679.3	78421.5
2973	82733739			3855.24	275.002	1.24916	2996.24	0	47313.5	63428.4	64450	58705.7	61250.2	77875.9
5399	82733755			3951.9	234.287	1.05112	2960.81	0	48499.7	65018.6	66065.9	60177.6	62785.8	79828.4
3013	82733761			3604.51	224.699	1.05557	3053.91	0	44236.4	59303.2	60258.4	54887.7	57266.7	72811.1
791	82733787			3772.83	230.972	1.06056	2991.51	0	46302	62072.4	63072.2	57450.7	59940.8	76211.1
4681	82733877			3616.12	259.596	1.21754	3023.56	0	44378.8	59494.2	60452.4	55064.4	57451.1	73045.6
4689	82733941			3984.71	272.554	1.21776	2921.1	0	48902.3	65558.4	66614.4	60677.2	63307.1	80491.1
30	82734047			3590.48	308.55	1.4523	2483.54	0	44064.1	59072.3	60023.8	54674	57043.7	72527.7
2990	82734053			3604.03	274.857	1.29128	2448.69	0	44230.4	59295.3	60250.4	54880.4	57259	72801.4
5457	82734091			4346.47	287.579	1.23026	2949.23	0	53342.1	71510.3	72662.1	66185.9	69054.5	87798.7
3993	82734575			3744.57	240.31	1.10759	2959.47	0	45955.3	61607.6	62599.9	57020.5	59491.9	75640.4
3060	72155433			3909.49	277.055	1.24972	3191.56	0	47979.3	64320.9	65356.9	59531.8	62112.1	78971.8
280	35205152			3800.08	291.255	1.33255	2808.37	0	46636.5	62520.8	63527.8	57865.7	60373.8	76761.6
1491	72140527			3564.18	255.175	1.2055	3143.99	0	43741.4	58639.7	59584.2	54273.6	56625.9	71996.5
3248	35188462			3516.58	230.316	1.0954	2882.71	0	43157.2	57856.5	58788.4	53548.7	55869.6	71034.9
1519	72140287			3515.43	240.77	1.14531	3151.06	0	43143.1	57837.6	58769.2	53531.2	55851.4	71011.7
4718	72140301			3367.15	222.898	1.08339	3095.08	0	41323.3	55398	56290.3	51273.2	53495.6	68016.4
3059	72155437			3338.44	270.597	1.32087	3200.28	0	40971.1	54925.8	55810.5	50836.2	53039.5	67436.6
3021	72140207			3298.24	252.922	1.24209	3095.45	0	40477.6	54264.2	55138.3	50223.9	52400.7	66624.4
3906	35204784			3269.73	217.623	1.07339	2699.15	0	40127.7	53795.2	54661.6	49789.7	51947.8	66048.5
3763	72130229			3227.16	222.245	1.10339	3105.35	0	39605.4	53094.9	53950.1	49141.6	51271.5	65188.7
2996	72130169			3195.74	221.564	1.10541	3032.42	0	39219.7	52577.8	53424.7	48663.1	50772.2	64553.9
2294	58228384			3141.92	252.34	1.26969	2800.23	0	38559.2	51692.5	52525.1	47843.6	49917.3	63466.8
2995	72130233			3118.22	232.683	1.17522	3180.21	0	38268.3	51302.5	52128.8	47482.7	49540.7	62988
3247	35188442			3109.47	297.904	1.50675	2854.18	0	38161	51158.6	51982.6	47349.5	49401.7	62811.3
6293	35193668			3075.62	275.811	1.40266	2826.53	0	37745.5	50601.6	51416.6	46834	48863.9	62127.5
6305	35180548			2748.82	195.789	1.05323	2783.66	0	33734.9	45225	45953.4	41857.7	43671.9	55526.2
6006	35180556			2904.53	206.379	1.08003	2781.53	0	35645.8	47786.7	48556.4	44228.7	46145.7	58671.4
6003	35180578			2912.84	233.471	1.22006	2756.88	0	35747.9	47923.5	48695.4	44355.3	46277.8	58839.4
3919	35180638			3381.91	228.83	1.10978	2808.99	0	41504.5	55640.9	56537.1	51498.1	53730.1	68314.6
3951	35180646			3078.17	210.257	1.06884	2875.61	0	37776.9	50643.6	51459.3	46872.8	48904.4	62179.1
3841	35180848			2500.61	226.13	1.27539	2856.59	0	30688.8	41141.3	41804	38078.1	39728.5	50512.4
5925	35180870			3290.89	209.54	1.03019	2938.01	0	40387.5	54143.4	55015.5	50112.1	52284.1	66476.1
5982	35180874			3407.23	314.456	1.51938	2856.31	0	41815.3	56057.5	56960.4	51883.6	54132.4	68826.1
3943	35180876			3450.44	250.616	1.20331	2966.83	0	42345.6	56768.4	57682.8	52541.6	54818.9	69698.9
3846	35180918			2792.51	206.553	1.1024	2863.18	0	34271.1	45943.8	46683.8	42523	44366	56408.8
3875	35180928			2526.65	199.806	1.1211	2839.8	0	31008.3	41569.7	42239.2	38474.5	40142.1	51038.3
5880	35180938			3288.08	222.516	1.09445	2827.68	0	40353	54097.2	54968.5	50069.3	52239.4	66419.3
1842	35180954			2763.14	238.465	1.27947	2877.37	0	33910.7	45460.6	46192.9	42075.8	43899.5	55815.5
388	35180964			2661.34	249.622	1.36471	2974.24	0	32661.3	43785.7	44490.9	40525.5	42282	53759
2622	35180976			2549.72	222.046	1.24024	2907.57	0	31291.4	41949.3	42625	38825.9	40508.7	51504.4
5773	35180984			2929.19	243.124	1.26696	2901.66	0	35948.4	48192.4	48968.7	44604.2	46537.4	59169.5
4303	35181150			3135.84	249.397	1.25609	2911.72	0	38484.6	51592.5	52423.5	47751.1	49820.7	63344.1
6288	35182222			2733.07	221.623	1.19563	2645.53	0	33541.6	44965.8	45690.1	41617.8	43421.6	55208
6315	35182250			2907.56	212.799	1.11305	2675.56	0	35683	47836.6	48607.1	44274.9	46193.9	58732.7
6295	35182264			2529.38	224.261	1.25763	2667.99	0	31041.8	41614.6	42284.9	38516.1	40185.5	51093.4
3792	35182276			3255.5	259.666	1.28355	2676.48	0	39953.2	53561.2	54423.9	49573.2	51721.8	65761.2
3769	35182318			2713.34	211.385	1.14454	2743.67	0	33299.5	44641.3	45360.3	41317.4	43108.3	54809.6
6287	35182320			2783.1	211.409	1.13023	2792.98	0	34155.5	45788.9	46526.4	42379.6	44216.4	56218.5
6004	35182324			3092.98	228.184	1.15719	2797.45	0	37958.6	50887.3	51706.9	47098.4	49139.7	62478.2
6319	35182340			2565.93	244.275	1.36008	2777.97	0	31490.4	42216	42895.9	39072.7	40766.2	51831.8
3909	35204732			2954.31	281.789	1.46219	2706.49	0	36256.8	48605.8	49388.7	44986.8	46936.7	59677.1
5877	35204780			2513.57	247.026	1.38965	2670.67	0	30847.8	41354.5	42020.6	38275.3	39934.3	50774.1
999	35205084			2716.37	214.641	1.16152	2900.9	0	33336.6	44691.1	45410.9	41363.5	43156.3	54870.6
292	35205258			2512.62	245.57	1.38172	2895.08	0	30836.1	41338.8	42004.7	38260.9	39919.2	50754.8
1760	35205266			3363.46	246.507	1.19879	2790.8	0	41278	55337.2	56228.6	51217	53436.9	67941.8
2569	35205274			3128.01	340.605	1.71761	2786.68	0	38388.5	51463.6	52292.5	47631.8	49696.3	63185.8
2567	35209546			3341.69	208.947	1.01944	3325.22	0	41010.9	54979.1	55864.7	50885.5	53091.1	67502.1
302	35209560			3180.02	216.579	1.0832	3371.92	0	39026.8	52319.3	53162	48423.8	50522.6	64236.4
287	35209584			3367.3	257.012	1.24917	3191.68	0	41325.1	55400.4	56292.8	51275.5	53497.9	68019.4
3296	35209678			2782.7	230.166	1.2306	3390.32	0	34150.7	45782.3	46519.8	42373.5	44210.1	56210.5
339	35210318			2685.76	208.745	1.13603	3206.27	0	32961	44187.5	44899.2	40897.4	42670	54252.3
1063	35210396			2781.86	202.171	1.08108	3290.5	0	34140.4	45768.6	46505.7	42360.8	44196.8	56193.6
2599	35210720			2991.35	227.08	1.17099	3402.38	0	36711.3	49215.1	50007.8	45550.7	47525	60425.2
4286	35210760			2652.57	215.48	1.18	3398.88	0	32553.6	43641.4	44344.3	40392	42142.7	53581.8
4982	35210796			2546.59	249.914	1.39675	3409.22	0	31253	41897.7	42572.6	38778.2	40458.9	51441.1
5627	35219160			2736.83	234.293	1.26311	3203.19	0	33587.7	45027.7	45752.9	41675	43481.4	55283.9
6297	35227610			2839.14	309.819	1.63992	2712.01	0	34843.3	46710.9	47463.2	43232.9	45106.8	57350.5
6261	35227616			2825.8	262.817	1.39441	2779.97	0	34679.6	46491.5	47240.3	43029.9	44894.9	57081.1
6308	35227618			3307.14	212.227	1.04084	2767.76	0	40586.9	54410.7	55287.1	50359.5	52542.2	66804.3
2831	40035445			2601.24	192.338	1.06361	3298.8	0	31923.7	42796.9	43486.3	39610.4	41327.2	52545.1
3608	40035503			2676.91	306.951	1.67325	3279.98	0	32852.3	44041.8	44751.2	40762.6	42529.4	54073.5
2121	40035513			2699.28	208.747	1.13319	3322.14	0	33126.9	44409.9	45125.2	41103.3	42884.8	54525.4
3672	40035573			3311.38	240.436	1.17843	3012.25	0	40638.9	54480.5	55358	50424	52609.6	66889.9
2215	40035587			2544.37	255.071	1.42619	2975.32	0	31225.8	41861.3	42535.5	38744.4	40423.7	51396.3
2906	40035639			3377.01	258.5	1.25459	2988.25	0	41444.4	55560.3	56455.2	51423.5	53652.3	68215.7
2235	40035707			2604.23	221.247	1.22277	2956.35	0	31960.4	42846.1	43536.2	39655.9	41374.7	52605.4
6196	40035709			2997.49	230.175	1.18573	3007.7	0	36786.7	49316.2	50110.6	45644.3	47622.7	60549.4
1384	40035789			2941.7	271.604	1.41236	3016.7	0	36102	48398.3	49177.8	44794.7	46736.2	59422.3
5350	40035811			2667.45	205.957	1.1247	2958.21	0	32736.3	43886.2	44593.1	40618.6	42379.1	53882.5
2207	40035841			3057.44	256.536	1.30851	2988.34	0	37522.4	50302.5	51112.8	46557.2	48575.1	61760.3
2210	40035859			3230.68	225.251	1.11771	2973.03	0	39648.6	53152.8	54009	49195.2	51327.5	65259.8
3690	40035861			2994.64	237.377	1.22341	2949.92	0	36751.7	49269.3	50062.9	45600.9	47577.4	60491.7
2950	40035873			2663.11	316.136	1.72777	2940.33	0	32683.1	43814.9	44520.6	40552.6	42310.2	53794.9
722	40035923			2794.56	210.017	1.12048	2938.9	0	34296.2	45977.5	46718	42554.1	44398.5	56450.1
2163	40035957			2561.23	187.14	1.04292	3144.62	0	31432.7	42138.6	42817.4	39001.1	40691.5	51736.8
6195	40035975			2906.15	280.826	1.46922	2984.78	0	35665.7	47813.4	48583.5	44253.4	46171.4	58704.2
2248	40035983			2659.39	207.173	1.13305	2931.2	0	32637.4	43753.6	44458.4	40495.9	42251.1	53719.7
1338	40036037			2769.76	198.648	1.06456	3300.18	0	33991.9	45569.4	46303.4	42176.5	44004.5	55949.1
3711	40036045			2958.2	203.327	1.05436	2932.1	0	36304.5	48669.8	49453.7	45046	46998.4	59755.6
1440	40036079			3212.12	320.118	1.59302	2913.72	0	39420.8	52847.5	53698.7	48912.6	51032.6	64884.9
2119	40036087			3013.25	203.497	1.04556	3220.17	0	36980.1	49575.5	50374	45884.2	47873	60867.6
2952	40036107			2592.3	197.739	1.09536	2923.13	0	31814	42649.8	43336.7	39474.2	41185.1	52364.4
1333	40036111			2742.45	201.313	1.0842	3195.62	0	33656.7	45120.2	45846.9	41760.7	43570.7	55397.5
5353	40036133			2653.26	190.904	1.04528	2910.32	0	32562.1	43652.8	44355.9	40402.5	42153.7	53595.9
6228	40036161			2512.79	317.457	1.78613	2918.53	0	30838.2	41341.6	42007.5	38263.5	39921.9	50758.3
5306	40036223			2513.42	189.999	1.06887	3133.32	0	30845.9	41352	42018.1	38273.1	39931.9	50771
2165	40036309			3118.23	288.883	1.45907	3153.81	0	38268.5	51302.7	52129.1	47482.9	49540.9	62988.3
2150	40036357			2726.8	284.437	1.53627	3279.01	0	33464.6	44862.6	45585.2	41522.3	43322	55081.3
6246	40036377			3300.67	244.708	1.20131	2897.82	0	40507.5	54304.3	55179	50261	52439.4	66673.6
1449	40036389			2526.36	243.336	1.36542	2893.15	0	31004.7	41564.9	42234.4	38470.1	40137.5	51032.4
2924	40036475			2805.81	209.436	1.11514	2947.08	0	34434.3	46162.6	46906.1	42725.5	44577.3	56677.3
6210	40036507			2836.07	265.285	1.40495	2947.41	0	34805.6	46660.4	47411.9	43186.2	45058	57288.5
4641	40036539			2972.1	278.771	1.44219	2873.79	0	36475.1	48898.5	49686.2	45257.7	47219.3	60036.5
4617	40036703			2968.44	231.631	1.19906	2932.16	0	36430.2	48838.3	49625	45202	47161.2	59962.6
2222	40036725			3330.36	339	1.65677	2950.03	0	40871.8	54792.8	55675.3	50713.1	52911.1	67273.3
694	40036743			2834.13	302.943	1.60494	2963.02	0	34781.9	46628.5	47379.6	43156.7	45027.3	57249.5
651	40036757			2958.07	234.713	1.21714	3215.24	0	36303	48667.7	49451.6	45044.1	46996.4	59753.1
1433	40036759			2652.27	293.444	1.60703	2932.94	0	32550	43636.5	44339.3	40387.4	42137.9	53575.8
6189	40036809			2567.49	260.302	1.44887	3036.53	0	31509.5	42241.6	42922	39096.5	40791	51863.3
2239	40036829			2770.59	276.067	1.47923	2925.78	0	34002.1	45583.1	46317.4	42189.2	44017.8	55965.9
6205	40036851			2724.72	219.321	1.18502	2975.29	0	33439.1	44828.4	45550.5	41490.7	43289	55039.3
6240	40036859			3093.92	316.054	1.60256	2852.41	0	37970.2	50902.8	51722.7	47112.7	49154.7	62497.3
3658	40036887			2789.29	267.496	1.42849	3043.22	0	34231.5	45890.7	46629.9	42473.9	44314.8	56343.6
658	40036903			3067.2	211.638	1.07778	3054.73	0	37642.2	50463.1	51275.9	46705.8	48730.1	61957.4
1388	40036915			2874.03	277.11	1.45786	3040.19	0	35271.5	47285	48046.6	43764.3	45661.1	58055.4
3702	40036919			2545.85	225.17	1.25864	2924.67	0	31243.9	41885.6	42560.2	38766.9	40447.2	51426.1
1423	40037033			2804.48	261.619	1.39332	2945.46	0	34418	46140.7	46883.9	42705.2	44556.2	56650.5
2915	40037047			3443.72	262.264	1.26047	2951.23	0	42263.1	56657.8	57570.4	52439.3	54712.1	69563.2
5339	40037069			2520.01	213.156	1.19758	2953.29	0	30926.8	41460.4	42128.2	38373.4	40036.6	50904.2
715	40037105			2778.98	269.023	1.43931	2906.49	0	34105.1	45721.2	46457.7	42317	44151.1	56135.5
4522	40037297			3002.95	242.972	1.25052	3031.14	0	36853.7	49406	50201.7	45727.4	47709.3	60659.5
3606	40037313			2740.71	209.316	1.12766	2973.22	0	33635.3	45091.5	45817.8	41734.1	43543	55362.3
3614	40037381			3234.77	275.546	1.36641	2869.65	0	39698.7	53220	54077.2	49257.4	51392.4	65342.3
3593	40037385			2914.89	232.07	1.21232	2968.74	0	35773	47957.3	48729.7	44386.5	46310.4	58880.8
623	40037411			2516.01	226.708	1.27473	2960.53	0	30877.7	41394.6	42061.3	38312.5	39973.1	50823.3
5519	46845747			2552.77	186.717	1.04228	2775.23	0	31328.9	41999.5	42676	38872.4	40557.2	51566
2397	46845761			3483.82	261.505	1.24957	2775.15	0	42755.1	57317.5	58240.7	53049.8	55349.1	70373.1
951	46845849			3076.97	227.759	1.15803	2724.3	0	37762.2	50623.9	51439.3	46854.6	48885.4	62154.9
202	46845921			2676.26	292.635	1.5954	3018.05	0	32844.4	44031.1	44740.3	40752.7	42519	54060.4
3211	46845985			3237.84	207.846	1.0302	3204.6	0	39736.4	53270.6	54128.6	49304.2	51441.2	65404.4
194	46846037			2516.35	229.697	1.29145	2703.71	0	30881.9	41400.3	42067.1	38317.8	39978.5	50830.3
2421	46846055			2885.46	257.846	1.35382	3107.9	0	35411.8	47473	48237.6	43938.3	45842.7	58286.2
2402	46846061			3461.4	221.643	1.06252	3118.22	0	42480	56948.6	57865.9	52708.4	54992.9	69920.2
1601	46846077			3265.45	236.468	1.1671	3180.53	0	40075.2	53724.7	54590.1	49724.6	51879.8	65962
2418	46846123			2900.77	220.858	1.15655	3289.29	0	35599.8	47725	48493.7	44171.5	46086	58595.6
1612	46846147			2552.17	236.233	1.31884	3228.68	0	31321.5	41989.6	42665.9	38863.2	40547.6	51553.9
2426	46848559			2872.92	207.703	1.09292	2589.98	0	35257.9	47266.7	48028	43747.4	45643.5	58033
4784	46848601			3377.79	259.182	1.25776	2614.8	0	41453.9	55573.1	56468.2	51435.3	53664.6	68231.4
858	46848623			2565.11	189.145	1.0533	2685.8	0	31480.3	42202.5	42882.2	39060.2	40753.2	51815.2
154	46848627			2788.64	204.331	1.09131	2633.13	0	34223.6	45880.2	46619.2	42464.1	44304.6	56330.6
144	46848677			2674.41	213.858	1.16632	2693.57	0	32821.8	44000.8	44709.5	40724.6	42489.8	54023.2
4769	46848681			3489.5	284.292	1.35735	2731.23	0	42824.9	57411	58335.7	53136.4	55439.4	70487.9
2398	46848751			3122.34	238.533	1.20397	2732.54	0	38318.9	51370.3	52197.7	47545.4	49606.1	63071.2
227	46849745			3386.12	246.638	1.19541	2949.03	0	41556.2	55710.2	56607.5	51562.2	53797	68399.7
167	46852509			2507.35	207.507	1.16878	3306.48	0	30771.5	41252.2	41916.7	38180.7	39835.6	50648.5
184	46852529			3072	212.502	1.08134	3219	0	37701.1	50542	51356.1	46778.8	48806.3	62054.3
5572	46852547			3240.13	234.401	1.16141	3224.19	0	39764.5	53308.2	54166.8	49339	51477.5	65450.6
5558	46852549			2950.38	211.948	1.10052	3225.39	0	36208.6	48541.2	49323	44927	46874.2	59597.8
3087	46858675			2879.92	195.613	1.02805	3165.98	0	35343.8	47381.8	48145	43853.9	45754.7	58174.3
838	46858681			2757.97	219.442	1.17851	3147.82	0	33847.2	45375.5	46106.3	41997	43817.2	55710.9
117	46858683			3071.47	216.508	1.10181	3175.87	0	37694.6	50533.4	51347.3	46770.8	48798	62043.7
964	46867095			2669.36	213.026	1.16289	3241.86	0	32759.8	43917.7	44625.1	40647.7	42409.5	53921.1
2487	46867135			2560.26	258.639	1.44165	3390.14	0	31420.8	42122.7	42801.2	38986.4	40676.2	51717.3
1688	46867139			2587.86	243.362	1.34924	3302.82	0	31759.5	42576.8	43262.6	39406.7	41114.7	52274.8
4018	46871599			2821.68	280.893	1.4914	2688.67	0	34629.1	46423.7	47171.5	42967.2	44829.5	56998
4725	46871607			3278.03	212.255	1.04559	2705.23	0	40229.6	53931.8	54800.4	49916.2	52079.7	66216.2
68	46871787			3003.47	207.953	1.07019	2847.28	0	36860	49414.5	50210.4	45735.3	47717.6	60670
1522	46871791			2871.68	208.49	1.0973	2865.49	0	35242.7	47246.3	48007.3	43728.5	45623.8	58007.9
4685	46878165			3469.98	218.208	1.04476	2923.15	0	42585.3	57089.8	58009.4	52839.1	55129.3	70093.6
805	46878211			3161.47	224.917	1.1282	2841.03	0	38799.1	52014.1	52851.9	48141.3	50227.9	63861.7
3097	46878307			2711.41	247.411	1.34007	2776.46	0	33275.8	44609.5	45328	41288	43077.5	54770.5
1574	46878349			2724.82	207.911	1.12335	3059.87	0	33440.4	44830.1	45552.2	41492.2	43290.6	55041.4
5084	58223960			3304.92	220.656	1.08254	3408.47	0	40559.7	54374.3	55250.1	50325.7	52507	66759.5
462	58224000			2955.08	203.94	1.0581	3350.05	0	36266.2	48618.4	49401.5	44998.4	46948.8	59692.5
230	58224002			2723.59	229.87	1.24228	3460.07	0	33425.3	44809.9	45531.7	41473.5	43271.1	55016.6
2390	58224010			2512.26	191.062	1.0751	3225.86	0	30831.7	41332.9	41998.6	38255.4	39913.5	50747.6
1807	58224016			3155.67	210.596	1.05734	3561.15	0	38727.9	51918.6	52754.8	48052.9	50135.6	63744.4
479	58224038			3286.93	223.015	1.0971	3346.31	0	40338.9	54078.3	54949.3	50051.8	52221.2	66396.1
127	58224106			3222.92	218.455	1.08528	3157.73	0	39553.3	53025.2	53879.2	49077.1	51204.2	65103.1
5506	58224126			2976.41	222.692	1.15124	3158.06	0	36528	48969.4	49758.1	45323.3	47287.7	60123.5
4152	58224156			3266.03	208.006	1.02654	3424.52	0	40082.4	53734.4	54599.9	49733.5	51889.1	65973.8
4821	58224216			2867.92	202.156	1.06466	3348.42	0	35196.6	47184.5	47944.5	43671.3	45564.1	57932
4847	58224226			3247.07	250.37	1.23921	3384.9	0	39849.7	53422.4	54282.9	49444.8	51587.8	65590.8
212	58224266			2774.33	221.484	1.18596	3278.79	0	34048	45644.7	46379.9	42246.2	44077.2	56041.5
5505	58224272			2647.89	185.617	1.01736	3102.99	0	32496.2	43564.4	44266.1	40320.7	42068.3	53487.4
1676	58224276			2604.63	196.612	1.08654	3337.02	0	31965.3	42852.6	43542.9	39662	41381	52613.5
967	58224284			2892.2	251.589	1.31943	3371.97	0	35494.5	47583.9	48350.3	44040.9	45949.8	58422.4
486	58224298			3405.24	239.401	1.15707	3310.88	0	41790.8	56024.7	56927.1	51853.3	54100.7	68785.8
2380	58224344			2567.26	199.951	1.113	3094.72	0	31506.7	42237.8	42918.2	39092.9	40787.3	51858.6
4151	58224362			2891.64	204.158	1.07078	3302.65	0	35487.7	47574.7	48341	44032.5	45941	58411.2
1677	58224406			3201.01	269.806	1.34498	3327.69	0	39284.4	52664.6	53512.9	48743.4	50856	64660.4
2716	58224422			3018.27	424.255	2.17799	3256.55	0	37041.7	49658.1	50457.9	45960.7	47952.8	60969
943	58224480			3461.31	228.733	1.09652	3239.54	0	42478.9	56947.2	57864.4	52707.1	54991.6	69918.5
4322	58224532			2866.17	285.615	1.50466	3458.59	0	35175	47155.6	47915.1	43644.5	45536.2	57896.6
1696	58224554			2577.96	183.776	1.02084	3329.18	0	31638	42413.9	43097.1	39255.9	40957.4	52074.8
4265	58224598			2896.61	222.346	1.16518	3446.37	0	35548.6	47656.4	48424	44108.1	46019.9	58511.5
5583	58224600			2615.46	189.643	1.04585	3328.71	0	32098.2	43030.8	43723.9	39826.8	41553	52832.2
2714	58224608			2660.24	246.316	1.34691	3298.1	0	32647.8	43767.6	44472.6	40508.8	42264.6	53736.9
906	58224632			3260.58	217.729	1.07542	3313.44	0	40015.5	53644.7	54508.7	49650.5	51802.5	65863.7
5607	58224636			3114.63	307.274	1.55285	3264.59	0	38224.3	51243.5	52068.8	47428	49483.7	62915.5
541	58224702			3173.47	244.446	1.22383	3342.23	0	38946.4	52211.5	53052.5	48324	50418.5	64104.1
5161	58224716			2958.66	220.113	1.14131	3317.73	0	36310.2	48677.4	49461.4	45053	47005.8	59765
4096	58224720			2855.57	202.221	1.0673	3332.3	0	35045	46981.3	47738	43483.2	45367.9	57682.5
3501	58224726			3402.67	239.165	1.15637	3335.18	0	41759.2	55982.4	56884.1	51814.1	54059.9	68733.9
5570	58224742			2566.46	184.281	1.02594	3327.2	0	31496.9	42224.7	42904.9	39080.8	40774.7	51842.6
3497	58224776			3134.86	250.165	1.26016	3305.27	0	38472.6	51576.3	52407	47736.1	49805.1	63324.2
1783	58224874			2901.4	230.827	1.20862	3458.77	0	35607.4	47735.3	48504.1	44181.1	46096	58608.3
1056	58224878			3463.16	244.277	1.17072	3462.85	0	42501.7	56977.7	57895.4	52735.3	55021	69955.9
3294	58224932			3312.05	233.689	1.14524	3312.4	0	40647.2	54491.6	55369.3	50434.3	52620.3	66903.5
1673	58224964			3387.99	220.236	1.06715	3277.16	0	41579.1	55740.9	56638.7	51590.6	53826.7	68437.4
1735	58224980			2963.56	206.504	1.06987	3286.53	0	36370.3	48757.9	49543.3	45127.6	47083.5	59863.9
4206	58225020			3057.57	236.139	1.20444	3304.83	0	37524	50304.7	51115	46559.2	48577.2	61762.9
183	58225026			2739.86	194.043	1.04554	3198.29	0	33624.9	45077.5	45803.6	41721.2	43529.5	55345.1
1246	58225046			2974.43	203.473	1.05223	3313.94	0	36503.7	48936.8	49725	45293.1	47256.2	60083.5
3201	58225048			2700.31	200.8	1.08985	3304.34	0	33139.5	44426.8	45142.4	41119	42901.2	54546.2
3380	58225062			2590.1	197.176	1.09271	3474.33	0	31787.1	42613.7	43300.1	39440.8	41150.3	52320.1
3202	58225070			3286.07	212.722	1.0466	3228.17	0	40328.3	54064.1	54934.9	50038.7	52207.5	66378.6
4041	58225108			2831.96	206.42	1.094	3010.24	0	34755.2	46592.8	47343.3	43123.7	44992.8	57205.6
2028	58225110			2954.05	253.423	1.31506	3243.38	0	36253.6	48601.5	49384.3	44982.8	46932.4	59671.8
1685	58225136			2752.07	197.931	1.06412	3214.71	0	33774.8	45278.4	46007.7	41907.1	43723.5	55591.8
3271	58225162			2868.29	209.271	1.10206	3263.57	0	35201	47190.5	47950.6	43676.8	45569.9	57939.4
1011	58225172			2936.72	209.203	1.08879	3308.18	0	36041	48316.5	49094.7	44719	46657.2	59321.8
215	58225174			3438.74	238.475	1.14697	3226.82	0	42201.9	56575.9	57487.1	52363.4	54633	69462.5
256	58225190			2756.95	224.568	1.20626	3388.08	0	33834.6	45358.7	46089.3	41981.4	43801	55690.3
4826	58225270			2796.09	204.532	1.09092	3264.91	0	34315	46002.6	46743.6	42577.4	44422.8	56480.9
411	58225298			2613.77	219.98	1.21355	3387.43	0	32077.5	43003	43695.7	39801.2	41526.3	52798.1
123	58225352			2690.75	189.882	1.03242	3046.31	0	33022.2	44269.6	44982.6	40973.4	42749.3	54353.2
2738	58225370			2665.11	225.748	1.23332	3255.25	0	32707.6	43847.7	44554	40583	42341.9	53835.2
1116	58225454			3021.85	201.915	1.03595	3555.8	0	37085.6	49716.9	50517.7	46015.2	48009.6	61041.3
4456	58225500			2719.91	206.78	1.11825	3151.04	0	33380.1	44749.3	45470.1	41417.4	43212.6	54942.2
6087	58225536			2949.18	207.584	1.07808	3290.59	0	36193.8	48521.4	49302.9	44908.6	46855.1	59573.4
3270	58225544			3172.15	279.731	1.40078	3226.49	0	38930.3	52189.9	53030.5	48304	50397.6	64077.5
833	58225558			3258.37	207.484	1.02516	3009.17	0	39988.4	53608.3	54471.8	49616.8	51767.4	65819.1
5138	58225596			2623.32	273.828	1.50785	3203.12	0	32194.7	43160.1	43855.3	39946.6	41678	52991
4316	58225608			3093.57	240.688	1.22049	3439.33	0	37965.8	50897	51716.8	47107.3	49149.1	62490.1
390	58225610			2876.58	222.052	1.16768	3438.54	0	35302.8	47326.9	48089.1	43803.1	45701.6	58106.8
5647	58225614			3219.82	209.245	1.04003	3401.22	0	39515.3	52974.1	53827.4	49029.8	51154.9	65040.4
6041	58225644			2535.09	236.001	1.32198	3194.98	0	31111.9	41708.5	42380.3	38603	40276.2	51208.8
5051	58225672			2552.88	246.686	1.37701	3265.95	0	31330.3	42001.3	42677.8	38874	40559	51568.3
182	58225674			2910.55	211.149	1.10385	3083.26	0	35719.7	47885.8	48657.1	44320.4	46241.4	58793.1
4819	58225728			2597.29	193.952	1.07335	3264.97	0	31875.3	42732	43420.2	39550.3	41264.5	52465.3
2464	58225730			2578.08	199.855	1.11013	3287.72	0	31639.5	42415.9	43099.1	39257.7	40959.3	52077.2
4106	58225750			3088.48	216.633	1.09941	3136.21	0	37903.4	50813.2	51631.7	47029.8	49068.2	62387.3
2008	58225794			3345.37	268.143	1.30753	3214.69	0	41056.1	55039.7	55926.3	50941.7	53149.6	67576.5
1108	58225810			3016.26	228.033	1.17104	3386.45	0	37017	49625	50424.3	45930	47920.8	60928.4
5646	58225814			2943.2	227.406	1.18223	3351.79	0	36120.4	48422.9	49202.9	44817.5	46760	59452.6
5013	58225822			2821.7	201.023	1.06733	3385.73	0	34629.3	46424	47171.7	42967.4	44829.7	56998.3
2494	58225852			3291.4	220.899	1.08595	3177.69	0	40393.7	54151.8	55024	50119.8	52292.1	66486.3
1827	58225882			2535.25	219.494	1.22948	3299.86	0	31113.8	41711.1	42383	38605.5	40278.7	51212
1610	58225900			2502.21	188.154	1.06086	3179.36	0	30708.4	41167.7	41830.8	38102.5	39753.9	50544.7
955	58225950			3316.85	305.455	1.49586	3217.11	0	40706.1	54570.5	55449.5	50507.4	52696.5	67000.4
927	58225954			3300.36	238.973	1.17321	3189.67	0	40503.7	54299.2	55173.8	50256.2	52434.5	66667.3
926	58225994			2814.54	200.866	1.06785	3180.15	0	34541.5	46306.2	47052.1	42858.4	44716	56853.7
1702	58226054			2859.32	197.15	1.03986	3218.65	0	35091	47043	47800.7	43540.3	45427.5	57758.3
1718	58226100			3150.85	216.874	1.08969	3279.11	0	38668.8	51839.3	52674.3	47979.5	50059.1	63647.1
1703	58226120			2805.41	216.56	1.15315	3241.68	0	34429.3	46155.9	46899.4	42719.3	44570.9	56669.2
2452	58226246			2733.98	194.895	1.05126	3030.46	0	33552.8	44980.8	45705.3	41631.7	43436.1	55226.4
890	58226248			2795.66	201.65	1.07563	3153.06	0	34309.8	45995.7	46736.5	42571	44416.1	56472.4
1646	58226292			3265.87	222.293	1.09707	3009.91	0	40080.4	53731.7	54597.1	49731	51886.5	65970.5
3317	58226298			2779.93	256.012	1.36946	3290.35	0	34116.7	45736.8	46473.5	42331.4	44166.2	56154.6
4929	58226322			3319.16	235.931	1.15499	3180.14	0	40734.4	54608.4	55488	50542.5	52733.1	67047
5834	58226336			2851.51	206.535	1.09085	3230.11	0	34995.2	46914.5	47670.1	43421.4	45303.4	57600.5
5642	58226360			3403.45	256.15	1.23835	3205.15	0	41768.8	55995.2	56897.1	51826	54072.3	68749.6
2634	58226364			2953.84	208.572	1.08236	3315.13	0	36250.9	48598	49380.7	44979.5	46929.1	59667.5
4790	58226376			2610.92	191.364	1.05626	3141.62	0	32042.6	42956.2	43648.1	39757.8	41481	52740.6
5058	58226394			2777.87	198.373	1.06153	3279.05	0	34091.5	45703	46439.1	42300.1	44133.5	56113.1
4091	58226404			2821.85	225.959	1.19969	3119.35	0	34631.2	46426.5	47174.3	42969.7	44832.2	57001.4
5567	58226406			2954.27	204.49	1.06109	3115.08	0	36256.3	48605.2	49388.1	44986.2	46936	59676.3
3488	58226428			2657.4	223.182	1.22107	3169.86	0	32612.9	43720.9	44425.1	40465.5	42219.4	53679.5
109	58226432			2593.68	197.986	1.09644	2486.23	0	31830.9	42672.5	43359.8	39495.2	41207.1	52392.3
255	58226440			3122.8	233.19	1.17692	3230.74	0	38324.5	51377.8	52205.3	47552.4	49613.4	63080.5
3180	58226458			3076.47	242.834	1.23479	3045.67	0	37756	50615.6	51430.9	46846.9	48877.4	62144.7
900	58226466			2668.75	202.32	1.10457	3117.42	0	32752.2	43907.6	44614.8	40638.4	42399.8	53908.8
1656	58226504			3429.73	223.944	1.07849	2970.06	0	42091.4	56427.6	57336.5	52226.2	54489.8	69280.5
1643	58226512			3137.21	229.141	1.15382	3051.85	0	38501.4	51614.9	52446.3	47771.9	49842.4	63371.6
2415	58226514			3259.33	234.11	1.15655	3138.87	0	40000.2	53624.2	54487.9	49631.5	51782.6	65838.5
2512	58226558			2760.08	212.192	1.13914	3159.18	0	33873.1	45410.2	46141.6	42029.1	43850.8	55753.6
1622	58226620			2623.77	223.183	1.22887	3125.3	0	32200.2	43167.6	43862.9	39953.5	41685.1	53000.1
3284	58226628			2846.71	211.125	1.11603	3251.04	0	34936.2	46835.4	47589.8	43348.2	45227.1	57503.5
3534	58226632			2964.08	250.711	1.29878	3230.26	0	36376.7	48766.5	49552	45135.5	47091.8	59874.4
88	58226666			3008.5	206.553	1.0621	2999.67	0	36921.8	49497.3	50294.6	45811.9	47797.5	60771.6
5544	58226684			2640.51	232.22	1.27457	3188.58	0	32405.6	43442.9	44142.6	40208.3	41951	53338.2
4185	58226756			2986.95	235.097	1.21322	3266.29	0	36657.3	49142.8	49934.3	45483.8	47455.1	60336.4
148	58226764			2531.12	185.52	1.04002	3212.33	0	31063.2	41643.2	42314	38542.6	40213.2	51128.6
4788	58226794			2541.16	222.678	1.24586	3177.96	0	31186.4	41808.5	42481.9	38695.6	40372.7	51331.5
1598	58226830			3406.53	244.182	1.17995	3200.1	0	41806.6	56045.9	56948.7	51872.9	54121.3	68811.9
87	58226832			3326	242.73	1.18705	3004.19	0	40818.4	54721.1	55602.5	50646.7	52841.9	67185.3
196	58226880			2800.62	237.378	1.26509	3032.94	0	34370.7	46077.3	46819.4	42646.5	44494.9	56572.6
885	58226896			2941.82	233.367	1.2135	3181.43	0	36103.5	48400.3	49179.9	44796.6	46738.2	59424.8
1556	58226918			2730.58	200.771	1.08363	2903.95	0	33511	44924.8	45648.4	41579.9	43382.1	55157.7
177	58227022			2930.54	210.985	1.09922	3193.72	0	35965	48214.7	48991.3	44624.8	46558.9	59196.9
5576	58227040			3023.69	209.424	1.07415	3105.74	0	37108.2	49747.2	50548.5	46043.2	48038.9	61078.5
4348	58227072			2793.74	200.394	1.0693	3373.96	0	34286.2	45964	46704.4	42541.7	44385.5	56433.6
4872	58227110			2848.32	196.578	1.03884	3193.17	0	34956	46862	47616.8	43372.8	45252.7	57536.1
2344	58227138			2849.35	215.831	1.14038	2986.11	0	34968.6	46878.9	47634	43388.4	45269	57556.8
4116	58227224			3091.18	209.013	1.06028	3195.2	0	37936.5	50857.7	51676.8	47071	49111.2	62441.9
5624	58227282			2937.52	215.285	1.12029	2873.63	0	36050.7	48329.6	49108	44731.1	46669.9	59337.9
1006	58227326			3061.55	205.346	1.0467	3180.4	0	37572.9	50370.1	51181.4	46619.7	48640.4	61843.3
5060	58227342			2771.59	243.46	1.30428	3264.4	0	34014.4	45599.7	46334.1	42204.5	44033.7	55986.2
4199	58227356			3085.7	220.859	1.12136	3151.61	0	37869.2	50767.4	51585.1	46987.4	49024	62331
1756	58227384			2841.09	208.463	1.10305	2541.38	0	34867.3	46743.1	47496	43262.8	45137.9	57390.1
1034	58227436			3102.45	278.726	1.41135	2511.33	0	38074.8	51043	51865.1	47242.5	49290.1	62669.4
3313	58227496			3068.74	204.274	1.04002	3132.25	0	37661.1	50488.5	51301.7	46729.2	48754.6	61988.6
4237	58227498			3164.06	210.316	1.05453	3169.18	0	38830.9	52056.6	52895.1	48180.7	50268.9	63913.9
5041	58227506			3316.7	226.381	1.10865	3144.1	0	40704.2	54568	55446.9	50505	52694.1	66997.3
1731	58227540			2593.1	218.376	1.20949	3158.53	0	31823.8	42663	43350.2	39486.5	41197.9	52380.7
426	58227606			2559.41	203.977	1.13715	3092.45	0	31410.3	42108.6	42786.9	38973.3	40662.6	51700
1965	58227658			2596.72	205.685	1.13841	2353.55	0	31868.2	42722.5	43410.6	39541.5	41255.3	52453.7
1027	58227690			3413.38	219.146	1.05791	2838.32	0	41890.8	56158.7	57063.3	51977.3	54230.2	68950.4
1106	58227746			2994.03	291.506	1.50254	2475.56	0	36744.2	49259.3	50052.7	45591.6	47567.7	60479.4
3419	58227774			3232.88	296.796	1.47222	2947.49	0	39675.5	53189	54045.7	49228.7	51362.4	65304.2
5067	58227814			2876.17	219.864	1.15626	2944.21	0	35297.7	47320.1	48082.3	43796.8	45695.1	58098.6
3524	58227816			3027.87	233.549	1.19707	2559.76	0	37159.5	49816	50618.4	46106.8	48105.2	61162.9
2383	58227824			2620.16	229.032	1.26194	2254.75	0	32155.9	43108.1	43802.4	39898.4	41627.7	52927.1
5066	58227854			2648.16	194.788	1.06757	2889.3	0	32499.5	43568.8	44270.6	40324.8	42072.6	53492.8
5839	58227888			3117.17	300.877	1.5199	2871.71	0	38255.5	51285.2	52111.3	47466.7	49524	62966.8
501	58227918			3325.15	304.693	1.49027	2292.53	0	40807.8	54706.9	55588.1	50633.6	52828.2	67167.9
44	58227970			2915.81	208.18	1.08734	2885.97	0	35784.2	47972.3	48745	44400.5	46324.9	58899.3
5833	58228040			3338.74	287.575	1.40368	2803.3	0	40974.7	54930.7	55815.4	50840.7	53044.3	67442.6
2674	58228078			3026.85	226.288	1.16004	2817.1	0	37147	49799.3	50601.4	46091.4	48089.1	61142.4
1654	58228324			3247.12	263.086	1.30213	2728.34	0	39850.3	53423.3	54283.8	49445.6	51588.7	65591.9
2739	58228326			2618.82	275.787	1.51995	2217.91	0	32139.5	43086.1	43780.1	39878.1	41606.5	52900.2
4965	58228478			2780.2	368.405	1.97059	2304.16	0	34120	45741.2	46478	42335.5	44170.4	56160
3485	58228534			2778.61	357.336	1.91192	2170.39	0	34100.6	45715.2	46451.5	42311.4	44145.2	56128
5292	72130167			2918.56	206.749	1.07936	2395.9	0	35818	48017.6	48791	44442.4	46368.6	58954.9
2299	72130349			2671.92	193.488	1.05572	3103.73	0	32791.1	43959.7	44667.8	40686.6	42450.1	53972.7
6277	72130473			3117.55	226.97	1.14649	2998.61	0	38260.2	51291.5	52117.7	47472.5	49530.1	62974.5
1	72137299			2576.55	192.806	1.07129	2958.32	0	31620.8	42390.8	43073.6	39234.5	40935	52046.4
868	72137309			2504.89	201.38	1.13483	2971.64	0	30741.3	41211.7	41875.5	38143.3	39796.5	50598.8
5447	72147735			2847.07	201.4	1.06455	2655.72	0	34940.6	46841.4	47595.9	43353.7	45232.8	57510.8
57	72147795			2936.86	219.708	1.14343	2712.39	0	36042.6	48318.7	49097	44721.1	46659.4	59324.6
1501	72147901			2621.72	202.324	1.11446	2870.61	0	32175	43133.8	43828.6	39922.2	41652.6	52958.7
2321	72147961			2528.96	197.517	1.10775	2944.46	0	31036.6	41607.6	42277.8	38509.7	40178.8	51084.9
3161	72150661			2720.54	205.246	1.10983	2679.55	0	33387.9	44759.7	45480.7	41427.1	43222.6	54955
2286	72150679			3366.63	278.987	1.35611	2728.45	0	41316.9	55389.4	56281.6	51265.3	53487.3	68005.9
34	72155283			2979.55	359.981	1.85999	2402.09	0	36566.5	49021	49810.6	45371.1	47337.6	60186.9
4680	72156619			3318.84	219.721	1.07569	2605.64	0	40730.4	54603.2	55482.7	50537.6	52728	67040.5
3486	75273145			3155.6	219.887	1.10399	3058.53	0	38727.1	51917.5	52753.8	48051.9	50134.6	63743.1
4432	75273149			3200.86	231.976	1.15643	3071.65	0	39282.6	52662.2	53510.5	48741.2	50853.7	64657.5
3490	75273327			2857.32	275.355	1.45285	3277.07	0	35066.4	47010	47767.2	43509.8	45395.6	57717.8
451	75276669			3114.43	205.351	1.0378	3199.98	0	38221.8	51240.1	52065.4	47424.9	49480.5	62911.4
1169	75276719			2937.11	218.912	1.13924	3319.09	0	36045.7	48322.9	49101.2	44724.9	46663.4	59329.7
5844	75276729			2501.06	185.938	1.04861	3364.82	0	30694.2	41148.6	41811.4	38084.8	39735.5	50521.3
450	75276735			2720.8	216.191	1.16895	3364.75	0	33391	44764	45485	41431	43226.7	54960.2
3460	75276753			3098.3	241.708	1.22472	3326.82	0	38023.9	50974.8	51795.9	47179.4	49224.3	62585.7
5994	75277015			2766.54	219.505	1.17702	2742.99	0	33952.3	45516.5	46249.6	42127.4	43953.4	55884.1
3822	75277025			3216.31	224.809	1.118	2731.73	0	39472.1	52916.3	53768.6	48976.3	51099.1	64969.4
3970	75277027			3424.14	217.12	1.04648	2723.47	0	42022.7	56335.6	57243	52141.1	54401	69167.6
3927	75277065			3216.16	256.197	1.27413	2750.09	0	39470.3	52913.8	53766.1	48974	51096.7	64966.4
5904	75277101			2506.75	196.765	1.10841	2761.28	0	30764.1	41242.4	41906.7	38171.6	39826.1	50636.4
3860	75277117			2754.9	221.412	1.18975	2773.07	0	33809.5	45325	46055.1	41950.3	43768.5	55649
3961	75277121			2855.05	215.562	1.13782	2773.68	0	35038.6	46972.6	47729.2	43475.2	45359.5	57671.9
5987	75277127			344.9	79.2437	1.20344	2773.06	0	4232.79	5674.47	5765.87	5251.97	5479.61	6966.99
3818	75277131			3139.67	213.176	1.07301	2767.47	0	38531.6	51655.5	52487.5	47809.4	49881.6	63421.4
3928	75277139			3223.1	219.472	1.09031	2775.13	0	39555.4	53028	53882.1	49079.7	51206.9	65106.5
3923	75277163			3354.98	214.416	1.04405	2790.45	0	41174	55197.8	56086.9	51088	53302.3	67770.6
5902	75277167			2828.94	218.039	1.15619	2791.81	0	34718.1	46543.1	47292.8	43077.6	44944.7	57144.5
5906	75277177			2903.25	205.63	1.07635	2787.52	0	35630.2	47765.7	48535.1	44209.3	46125.4	58645.7
3960	75277191			3019.33	206.781	1.06136	2803.84	0	37054.7	49675.5	50475.6	45976.8	47969.6	60990.4
5034	75277275			2835.78	218.585	1.15769	2779.79	0	34802.1	46655.6	47407.1	43181.8	45053.4	57282.7
5830	75277339			222.928	99.7698	1.88462	2957.27	0	2735.89	3667.73	3726.8	3394.64	3541.77	4503.15
456	75279983			2587.13	189.55	1.05105	2871.48	0	31750.5	42564.7	43250.3	39395.4	41103	52259.9
4392	75280001			3343.07	213.32	1.04056	2913.3	0	41027.9	55001.9	55887.9	50906.7	53113.1	67530.1
5080	75280093			3338.32	220.544	1.07656	2773.74	0	40969.5	54923.7	55808.4	50834.3	53037.6	67434.1
5108	75280137			256.955	69.0124	1.21424	2822.7	0	3153.48	4227.55	4295.65	3912.78	4082.37	5190.49
485	75280145			2668.8	234.369	1.27952	2827.89	0	32752.9	43908.5	44615.7	40639.2	42400.6	53909.9
1187	75280177			2650.27	191.315	1.04812	2814.39	0	32525.4	43603.5	44305.8	40356.9	42106.1	53535.4
1949	75280215			2965.16	202.651	1.04962	2887.67	0	36389.9	48784.2	49570	45151.9	47108.9	59896.1
3447	75280241			2708.04	206.871	1.12119	2890.86	0	33234.4	44554	45271.6	41236.6	43023.9	54702.3
1910	75280259			2533.24	244.356	1.36928	2831.38	0	31089.2	41678.2	42349.5	38574.9	40246.9	51171.5
3466	75280355			2852.06	204.349	1.0792	3139.67	0	35001.9	46923.5	47679.3	43429.7	45312.1	57611.6
3444	75280363			2967.39	201.757	1.0446	3010.91	0	36417.3	48820.9	49607.3	45185.9	47144.4	59941.2
5008	75283681			3263.54	265.875	1.31263	3362.59	0	40051.8	53693.4	54558.2	49695.5	51849.5	65923.5
5812	75283711			2570.17	202.574	1.12696	3192.73	0	31542.4	42285.8	42966.8	39137.3	40833.6	51917.5
1141	75283713			2753.79	196.49	1.05605	3193.11	0	33795.9	45306.8	46036.5	41933.4	43750.9	55626.6
3387	75283729			2982.06	200.362	1.03482	3280.28	0	36597.3	49062.3	49852.6	45409.3	47377.5	60237.6
1878	75283731			2634.09	214.398	1.17818	3289.46	0	32326.9	43337.4	44035.4	40110.6	41849.1	53208.6
4329	75283807			3273.28	220.184	1.08543	3423.7	0	40171.3	53853.6	54721	49843.8	52004.2	66120.2
2875	75284025			3324.84	222.343	1.08754	2895.47	0	40804.1	54701.9	55583	50629	52823.4	67161.8
1347	75284027			2673.92	212.835	1.16085	2900.63	0	32815.6	43992.6	44701.2	40717.1	42481.9	54013.1
643	75284065			3312.37	226.024	1.10763	2837.79	0	40651	54496.7	55374.5	50439.1	52625.3	66909.8
2880	75284101			3374.88	220.22	1.06914	3010.04	0	41418.3	55525.3	56419.6	51391.1	53618.5	68172.7
5756	75288899			2512.78	220.826	1.24245	3469.95	0	30838.1	41341.5	42007.4	38263.3	39921.8	50758.1
1086	75288933			2998.4	207.694	1.06976	3411.77	0	36797.9	49331.2	50125.8	45658.2	47637.1	60567.7
1269	75289279			2972.97	219.676	1.1363	2983.76	0	36485.8	48912.8	49700.7	45270.9	47233.1	60054
557	75289281			3336.07	228.935	1.1179	2975.21	0	40942	54886.8	55770.8	50800.1	53001.9	67388.7
3531	75289297			509.575	108.449	1.35498	2935.21	0	6253.75	8383.78	8518.81	7759.55	8095.87	10293.4
6107	75289331			3477.41	219.856	1.05152	2834.32	0	42676.6	57212.2	58133.7	52952.3	55247.4	70243.8
6075	75289395			2606.09	240.861	1.3307	2997.53	0	31983.2	42876.7	43567.3	39684.2	41404.2	52643
6072	75289407			3059.34	212.979	1.086	2992.13	0	37545.7	50333.8	51144.5	46586.1	48605.2	61798.6
1278	75289415			2541.73	251.81	1.40869	2970.15	0	31193.4	41817.8	42491.4	38704.2	40381.8	51343
2087	75289459			3027.8	205.424	1.05292	2828.61	0	37158.7	49814.9	50617.3	46105.9	48104.2	61161.6
2817	75294155			2595.51	186.827	1.03427	2902.16	0	31853.3	42702.6	43390.4	39523.1	41236.1	52429.2
3601	75294261			3476.28	213.963	1.0235	2841.05	0	42662.6	57193.4	58114.6	52935	55229.3	70220.8
4536	75294289			3009.42	219.497	1.12848	2852.81	0	36933.1	49512.5	50310	45826	47812.2	60790.3
1337	75294429			3045.29	248.063	1.26781	2874.46	0	37373.3	50102.7	50909.7	46372.2	48382.1	61514.9
4534	75294435			2599.3	204.898	1.13349	2885	0	31899.9	42765	43453.8	39580.8	41296.4	52505.8
2125	75294453			3077.2	212.759	1.08173	2894.19	0	37765	50627.7	51443.1	46858.1	48889	62159.5
3549	75294501			2870.96	201.849	1.06248	3105.71	0	35233.9	47234.5	47995.3	43717.6	45612.4	57993.5
648	75294541			2946.15	243.27	1.26406	2851.99	0	36156.6	48471.5	49252.2	44862.4	46806.9	59512.1
647	75294557			3261.35	280.388	1.38474	2865.09	0	40024.9	53657.3	54521.6	49662.2	51814.7	65879.2
4554	75294565			2998.72	211.232	1.08793	2889.04	0	36801.9	49336.5	50131.2	45663.1	47642.2	60574.2
607	75294645			3223.42	219.741	1.09159	2885.59	0	39559.4	53033.3	53887.5	49084.6	51212.1	65113
1833	75294661			2833.92	247.802	1.31286	3413.84	0	34779.3	46625.1	47376.1	43153.5	45023.9	57245.2
5260	75294683			2538.76	218.319	1.22205	3104.98	0	31156.9	41768.9	42441.7	38658.9	40334.5	51282.9
4314	75298317			2667.47	242.812	1.32596	3349.65	0	32736.5	43886.5	44593.4	40618.8	42379.4	53882.8
2821	75298811			2884.79	304.713	1.60008	2875.74	0	35403.6	47462.1	48226.6	43928.2	45832.2	58272.9
3559	75298863			2668.4	370.287	2.02172	2898.47	0	32747.9	43901.9	44609	40633.1	42394.2	53901.7
5453	82733497			2582.76	212.4	1.17874	3115.36	0	31697	42492.9	43177.4	39329	41033.7	52171.8
1518	82733507			3324.64	220.541	1.07876	3109.17	0	40801.6	54698.6	55579.6	50625.9	52820.2	67157.7
2358	82733513			2909.75	203.186	1.06237	3224.89	0	35709.8	47872.6	48643.7	44308.1	46228.6	58776.9
2359	82733575			2512.72	204.74	1.15196	3217.93	0	30837.4	41340.5	42006.4	38262.4	39920.8	50757
1481	82733611			3005.19	240.324	1.23643	3104.35	0	36881.2	49442.9	50239.2	45761.5	47744.9	60704.8
1489	82733635			2568.19	259.257	1.44286	3049.46	0	31518.1	42253.2	42933.7	39107.1	40802.1	51877.5
3004	82733647			2545.58	204.866	1.14521	3094.18	0	31240.6	41881.2	42555.8	38762.8	40442.9	51420.7
4698	82733667			3077.26	206.849	1.05167	3023.05	0	37765.6	50628.6	51444.1	46858.9	48889.9	62160.6
13	82733711			2541.32	197.166	1.10309	2973.12	0	31188.4	41811.1	42484.5	38698	40375.2	51334.7
755	82733857			3060.38	217.135	1.10701	2827.37	0	37558.5	50350.9	51161.9	46602	48621.8	61819.7
2325	82733885			2762.6	196.278	1.05322	2962.18	0	33904	45451.7	46183.8	42067.5	43890.8	55804.5
4276	82733939			3231.76	214.376	1.06357	2435.06	0	39661.8	53170.6	54027	49211.7	51344.7	65281.6
751	82734019			2659.43	248.034	1.35651	2327.07	0	32637.8	43754.3	44459	40496.5	42251.7	53720.5
72	82734083			2527.27	213.27	1.1965	2950.41	0	31015.9	41579.9	42249.6	38484	40151.9	51050.8
2302	82734335			3200.57	253.996	1.26626	2727.52	0	39279	52657.4	53505.5	48736.7	50849	64651.5
4674	82734433			3147.7	204.755	1.02931	2863.42	0	38630.1	51787.5	52621.6	47931.6	50009	63583.5
6322	120025295			3056.34	243.94	1.24448	2787.44	0	37509	50284.5	51094.4	46540.5	48557.6	61738.1
2356	120026713			2508.46	190.778	1.07432	2935.66	0	30785.1	41270.5	41935.2	38197.6	39853.2	50670.9
5410	120030838			2633.82	234.175	1.28693	3167.33	0	32323.6	43333	44031	40106.6	41844.9	53203.2
826	72140257			2848.87	221.444	1.17013	3104.18	0	34962.8	46871.1	47626	43381.2	45261.4	57547.2
765	72130163			2839.74	198.978	1.05311	2982.46	0	34850.7	46720.9	47473.4	43242.2	45116.4	57362.8
1142	75283697			2835.74	196.743	1.04201	3460.39	0	34801.6	46655	47406.5	43181.3	45052.8	57282
4699	72140277			2828.89	209.347	1.11011	3108.2	0	34717.5	46542.3	47292	43076.9	44944	57143.6
3972	75277227			2747.98	247.973	1.33415	2822.22	0	33724.6	45211.2	45939.4	41844.9	43658.5	55509.2
104	72140179			2725.74	249.904	1.35001	3204.33	0	33451.7	44845.3	45567.6	41506.2	43305.2	55060
3397	75277257			2673.62	213.733	1.16582	2860.52	0	32812	43987.7	44696.2	40712.5	42477.1	54007.1
762	72130327			2599.49	205.274	1.13553	3179.59	0	31902.2	42768.1	43457	39583.7	41299.4	52509.7
4015	72140361			2590	215.659	1.19516	3157.97	0	31785.8	42612	43298.3	39439.2	41148.6	52318
1500	72140519			2559.85	208.636	1.16303	3191.23	0	31415.8	42116	42794.3	38980.1	40669.7	51709
1033	35205168			2496.63	181.52	1.0246	2839.29	0	30639.9	41075.9	41737.5	38017.5	39665.3	50432
2988	72130181			2447.02	191.985	1.09461	3042.18	0	30031	40259.5	40908	37261.9	38877	49429.7
800	72155371			2433.8	228.231	1.30479	3118.84	0	29868.8	40042	40687	37060.6	38666.9	49162.7
3084	72140269			2401.22	180.371	1.03814	3105	0	29469	39506.1	40142.4	36564.6	38149.4	48504.7
793	72140291			2393.06	208.777	1.20369	3151.33	0	29368.8	39371.8	40006	36440.3	38019.7	48339.8
2305	72130293			2350.64	224.379	1.30526	3164.76	0	28848.3	38674	39296.9	35794.4	37345.9	47483
3061	72155439			2342.4	201.48	1.17411	3192.24	0	28747	38538.3	39159	35668.8	37214.8	47316.4
1478	72130195			2319.87	177.526	1.03953	3104.68	0	28470.6	38167.6	38782.4	35325.8	36856.9	46861.3
2371	72140177			2286.67	201.247	1.18696	3293.78	0	28063.1	37621.4	38227.3	34820.2	36329.4	46190.7
3042	72140289			2221.83	179.309	1.07289	3083.81	0	27267.4	36554.6	37143.4	33832.9	35299.3	44880.9
2319	72140379			2180.1	194.126	1.17261	3133.15	0	26755.3	35868.2	36445.9	33197.5	34636.4	44038.1
3020	72140223			2130.82	210.786	1.28788	3154.58	0	26150.5	35057.3	35622	32447.1	33853.4	43042.6
3071	72140249			2112.97	192.255	1.17961	3106.62	0	25931.4	34763.6	35323.5	32175.2	33569.7	42681.9
94	72155445			2100.14	200.584	1.23447	3203.62	0	25774	34552.5	35109.1	31979.9	33366	42422.8
67	72140283			2045.26	177.11	1.10453	3149.74	0	25100.4	33649.6	34191.6	31144.1	32494	41314.2
811	72140365			2024.85	178.245	1.11719	3132.55	0	24850	33313.9	33850.5	30833.4	32169.8	40902
[truncated: 4,321 more rows]
